# Supplementary material for: Thirty-year follow-up of the NICHD Study of Early Child Care and Youth Development (SECCYD): the challenges and triumphs of conducting in-person research at a distance
Source: PubMed Central journal article supplement — BMJ Open. 2023 Mar 20;13(3):e066655. doi: 10.1136/bmjopen-2022-066655 (PMC10030288; doi:10.1136/bmjopen-2022-066655), 2023-03-20
Supplement: bmjopen-2022-066655.draft_revisions.pdf [file bmjopen-2022-066655.draft_revisions.pdf]

# BMJ Open

BMJ Open is committed to open peer review. As part of this commitment we make the peer review history of every article we publish publicly available.

When an article is published we post the peer reviewers' comments and the authors' responses online. We also post the versions of the paper that were used during peer review. These are the versions that the peer review comments apply to.

The versions of the paper that follow are the versions that were submitted during the peer review process. They are not the versions of record or the final published versions. They should not be cited or distributed as the published version of this manuscript.

BMJ Open is an open access journal and the full, final, typeset and author-corrected version of record of the manuscript is available on our site with no access controls, subscription charges or pay-per-view fees (<http://bmjopen.bmj.com>).

If you have any questions on BMJ Open's open peer review process please email [info.bmjopen@bmj.com](mailto:info.bmjopen@bmj.com)

# BMJ Open

## Cohort Profile of a 30-Year Follow-up of the NICHD Study of Early Child Care and Youth Development (SECCYD): The Challenges and Triumphs of Conducting In-Person Research at a Distance

|                               |                                                                                                                                                                                                                                                                                                                                                                                                                                                                                                                                                                                                                                                                                                                                                                                                                                                                                                                                                                                                                                                                              |
|-------------------------------|------------------------------------------------------------------------------------------------------------------------------------------------------------------------------------------------------------------------------------------------------------------------------------------------------------------------------------------------------------------------------------------------------------------------------------------------------------------------------------------------------------------------------------------------------------------------------------------------------------------------------------------------------------------------------------------------------------------------------------------------------------------------------------------------------------------------------------------------------------------------------------------------------------------------------------------------------------------------------------------------------------------------------------------------------------------------------|
| Journal:                      | <i>BMJ Open</i>                                                                                                                                                                                                                                                                                                                                                                                                                                                                                                                                                                                                                                                                                                                                                                                                                                                                                                                                                                                                                                                              |
| Manuscript ID                 | bmjopen-2022-066655                                                                                                                                                                                                                                                                                                                                                                                                                                                                                                                                                                                                                                                                                                                                                                                                                                                                                                                                                                                                                                                          |
| Article Type:                 | Cohort profile                                                                                                                                                                                                                                                                                                                                                                                                                                                                                                                                                                                                                                                                                                                                                                                                                                                                                                                                                                                                                                                               |
| Date Submitted by the Author: | 23-Aug-2022                                                                                                                                                                                                                                                                                                                                                                                                                                                                                                                                                                                                                                                                                                                                                                                                                                                                                                                                                                                                                                                                  |
| Complete List of Authors:     | Bleil, Maria E; University of Washington, Department of Child, Family, & Population Health Nursing<br>Roisman, Glenn; University of Minnesota Twin Cities, Institute of Child Development<br>Gregorich, Steven; University of California San Francisco, School of Medicine<br>Appelhans, Bradley; Rush University Medical Center, Department of Preventive Medicine<br>Hiatt, Robert; University of California San Francisco, Department of Epidemiology and Biostatistics<br>Pianta, Robert; University of Virginia, School of Education and Human Development<br>Marsland, Anna; University of Pittsburgh, Department of Psychology<br>Slavich, George; University of California Los Angeles, Department of Psychiatry and Biobehavioral Sciences<br>Thomas, Alexis; University of Washington, Department of Child, Family, & Population Health Nursing<br>Yeung, Winnie; University of Washington, Department of Child, Family, & Population Health Nursing<br>Booth-LaForce, Cathryn; University of Washington, Department of Child, Family, & Population Health Nursing |
| Keywords:                     | EPIDEMIOLOGY, MENTAL HEALTH, PREVENTIVE MEDICINE, PUBLIC HEALTH, SOCIAL MEDICINE, CARDIOLOGY                                                                                                                                                                                                                                                                                                                                                                                                                                                                                                                                                                                                                                                                                                                                                                                                                                                                                                                                                                                 |
|                               |                                                                                                                                                                                                                                                                                                                                                                                                                                                                                                                                                                                                                                                                                                                                                                                                                                                                                                                                                                                                                                                                              |

SCHOLARONE™  
Manuscripts

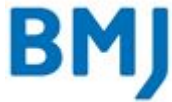

I, the Submitting Author has the right to grant and does grant on behalf of all authors of the Work (as defined in the below author licence), an exclusive licence and/or a non-exclusive licence for contributions from authors who are: i) UK Crown employees; ii) where BMJ has agreed a CC-BY licence shall apply, and/or iii) in accordance with the terms applicable for US Federal Government officers or employees acting as part of their official duties; on a worldwide, perpetual, irrevocable, royalty-free basis to BMJ Publishing Group Ltd ("BMJ") its licensees and where the relevant Journal is co-owned by BMJ to the co-owners of the Journal, to publish the Work in this journal and any other BMJ products and to exploit all rights, as set out in our [licence](#).

The Submitting Author accepts and understands that any supply made under these terms is made by BMJ to the Submitting Author unless you are acting as an employee on behalf of your employer or a postgraduate student of an affiliated institution which is paying any applicable article publishing charge ("APC") for Open Access articles. Where the Submitting Author wishes to make the Work available on an Open Access basis (and intends to pay the relevant APC), the terms of reuse of such Open Access shall be governed by a Creative Commons licence – details of these licences and which [Creative Commons](#) licence will apply to this Work are set out in our licence referred to above.

Other than as permitted in any relevant BMJ Author's Self Archiving Policies, I confirm this Work has not been accepted for publication elsewhere, is not being considered for publication elsewhere and does not duplicate material already published. I confirm all authors consent to publication of this Work and authorise the granting of this licence.

1  
2  
3 **Cohort Profile of a 30-Year Follow-up of the NICHD Study of Early Child Care and Youth Development**  
4 **(SECCYD): The Challenges and Triumphs of Conducting In-Person Research at a Distance**  
5  
6

7  
8 Maria E. Bleil, PhD<sup>1\*</sup>; Glenn I. Roisman, PhD<sup>2</sup>; Steven E. Gregorich, PhD<sup>3</sup>; Bradley M. Appelhans, PhD<sup>4</sup>; Robert A.  
9 Hiatt, MD, PhD<sup>5</sup>; Robert C. Pianta, PhD<sup>6</sup>; Anna L. Marsland, PhD<sup>7</sup>; George M. Slavich, PhD<sup>8</sup>; Alexis S. Thomas,  
10 MPH<sup>1</sup>; Winnie S. Yeung, BA<sup>1</sup>; and Cathryn Booth-LaForce, PhD<sup>1</sup>  
11

12 <sup>1</sup>Child, Family, and Population Health Nursing, University of Washington, Seattle, WA, USA

13 <sup>2</sup>Institute of Child Development, University of Minnesota, Minneapolis, MN, USA

14 <sup>3</sup>Department of Medicine, University of California San Francisco, San Francisco, CA, USA

15 <sup>4</sup>Department of Preventive Medicine, Rush University Medical Center, Chicago, IL, USA

16 <sup>5</sup>Department of Epidemiology and Biostatistics, University of California San Francisco, San Francisco, CA, USA

17 <sup>6</sup>School of Education and Human Development, University of Virginia, Charlottesville, VA, USA

18 <sup>7</sup>Department of Psychology, University of Pittsburgh, Pittsburgh, PA, USA

19 <sup>8</sup>Department of Psychiatry and Biobehavioral Sciences, University of California Los Angeles, Los Angeles, CA, USA  
20  
21  
22

23 **\*Corresponding Author:** Maria E. Bleil, PhD, Department of Child, Family, and Population Health Nursing,  
24 University of Washington, Box 357262, Seattle, WA 98195, USA.

25 Email: [mbleil@uw.edu](mailto:mbleil@uw.edu)  
26  
27

28 **Acknowledgements:**

29 We would like to recognize the important contributions of the large investigative team dedicated to the high-  
30 quality data collection of the SECCYD follow-up, SHINE. In addition to the lead investigators and co-investigators  
31 identified as co-authors, the internal UW research team included Rebecca Christopf, Madalyn Osbourne,  
32 Hailey Hagins, and Linda Nzabamwita. The in-field data collectors and phlebotomists included Damara Acosta,  
33 Taylor Haase, Connie Showalter, Mary Koller, Khamia Powell, Rochelle Eskridge, Megan Buss, Kay Harrington,  
34 Amanda O'Brien, Angie Mondestin, Leah Welker, Karen Nowden, Emily Goodrum, Tracey Pinkney, Libby Shook,  
35 Kelsey Smith, Danielle Heusted, and Kristen Roynesdal. The laboratory work was conducted by the UW Research  
36 Testing Services; the UW School of Nursing Biobehavioral Lab Testing and Education Core (Ernie Tolentino); the  
37 UVA Center for Research in Reproduction Ligand Assay and Analysis Core, supported by NIH/NICHD R24  
38 HD102061; and the UW Center for Studies in Demography & Ecology (Eleanor Brindle, Melanie Martin, Carmen  
39 Hove, and Maia Kent), supported by NIH/NICHD P2C HD042828. Questionnaire administration was conducted  
40 using REDCap, supported by the UW Institute of Translational Health Sciences, NIH/NCATS UL1 TR002319.  
41  
42

43 **Patient and public involvement:** None.  
44  
45

46 **Patient consent for publication:** Not required.  
47

48 **Ethics approval:** Informed consent for the NICHD SECCYD follow-up study, SHINE, was obtained from the target  
49 participants. The research was approved by the Human Subjects Division of the University of Washington  
50 (STUDY00001821).  
51

52 **Provenance and peer review:** Not commissioned; externally peer reviewed.  
53

54 **Data availability statement:** Data and materials from the NICHD SECCYD are available online:  
55 [icpsr.umich.edu/web/ICPSR/series/233](http://icpsr.umich.edu/web/ICPSR/series/233). Researchers interested in working with the team of investigators who  
56  
57  
58  
59

1  
2  
3 led the SHINE follow-up data collection are invited to contact MEB and GIR. Potential collaborative efforts will be  
4 considered under specific conditions, including, but not limited to, the proposed scope of work and assurances  
5 related to data security and integrity.  
6

7  
8 **Open access:** This is an open access article distributed in accordance with the Creative Commons Attribution  
9 Non Commercial (CC BY-NC 4.0) license, which permits others to distribute, remix, adapt, build upon this work  
10 non-commercially, and license their derivative works on different terms, provided the original work is properly  
11 cited, appropriate credit is given, any changes made indicated, and the use is non-commercial.

12 See: <http://creativecommons.org/licenses/by-nc/4.0/>.  
13

14 **ORCID IDs:**

15 **Maria Bleil**, <https://orcid.org/0000-0002-2006-4533>  
16  
17  
18  
19  
20  
21  
22  
23  
24  
25  
26  
27  
28  
29  
30  
31  
32  
33  
34  
35  
36  
37  
38  
39  
40  
41  
42  
43  
44  
45  
46  
47  
48  
49  
50  
51  
52  
53  
54  
55  
56  
57  
58  
59  
60

## ABSTRACT

### Purpose

The purpose of the current study, The Study of Health in Early and Adult Life (SHINE), was to build on the landmark NICHD Study of Early Child Care and Youth Development (SECCYD), a longitudinal birth cohort initiated in 1991, by conducting a health-focused follow-up of the now adult participants. This effort has produced an invaluable resource for the pursuit of life course research examining links between early life exposures and adulthood health and disease risk.

### Participants

Of the 927 NICHD SECCYD participants available for recruitment in the current study, 705 (76.1%) participated. Participants were between 26-31 years and living in diverse geographic locations throughout the United States.

### Findings to date

In descriptive analyses, the sample exhibited risk on health status indicators, especially related to obesity, hypertension, and diabetes. Of particular concern, the prevalence of hypertension and pre-diabetes and diabetes exceeded national estimates in similar-age individuals. Also in descriptive analyses, the health behavior indicators generally tracked with the parameters of poor health status, showing a pattern of poor diet, low activity, and disrupted sleep. The juxtaposition of the sample's relatively young age and high educational status (55.6% with a college degree or greater) with its poor health status is noteworthy, suggesting a dissociation between health and factors that are typically health protective. This is consistent with observed population health trends which show a worsening of cardiometabolic health status in younger generations of Americans.

### Future plans

The current study, SHINE, lays the groundwork for future analyses in which the uniquely robust measures collected as a part of the original NICHD SECCYD will be leveraged to pinpoint specific early life risk and resilience factors as well as the correlates and potential mechanisms accounting for variability in health and disease risk indicators in the period of young adulthood.

### Strengths and limitations of this study

- The current study, SHINE, leveraged the original NICHD SECCYD to extend and maximize the value of this longitudinal birth cohort by collecting adulthood measures of health, thereby, creating an invaluable resource for the pursuit of life course research relating early life exposures to adulthood health and disease risk.
- Gold standard methods were used for the measurement of each health status and health behavior indicator.
- Extensive recruitment methods were used to engage participants living in different locations throughout the United States and adaptations to the study procedures were developed (e.g., 'self-administered' study protocol) to allow flexibility with participation, especially needed through the COVID-19 pandemic.
- The nature of the data collection required that data collection teams work in the field to implement the study protocols, thus, resulting in many challenges, including the management of numerous staff persons, physical distance from the participants, and varied data collection environments.

## INTRODUCTION

The NICHD Study of Early Child Care and Youth Development (SECCYD) is a landmark study of child development conducted in the United States between 1991 and 2009.<sup>1</sup> It was initiated by the NIH National Institute of Child Health and Human Development (NIH/NICHD) to characterize impacts of early childcare environments on domains of child social, emotional, and cognitive development as well as aspects of physical development and health. Families were enrolled at the child's birth from diverse geographic locations and followed annually over the course of the study. The breadth and depth of measurement available in the NICHD SECCYD has made it a unique resource for developmental scientists, supporting a wealth of discovery in broad areas of child health and well-being. To date, well over one thousand scientific research articles have been published leveraging these data with additional efforts employed to follow the members of this longitudinal birth cohort who are now in young adulthood.

The value of the NICHD SECCYD continues to grow over time, most especially in its potential to inform timely research questions relating early life environments to adulthood health and disease risk.<sup>2,3</sup> Burgeoning areas of research suggest the origins of adulthood health and disease are rooted in early life environments.<sup>4-9</sup> In these studies, markers indexing childhood exposures such as maladaptive family interactions (e.g., abuse) and lower socioeconomic status (e.g., low parental education) have been identified as early life risk factors for long-term disease and mortality outcomes, as well as intermediate health conditions (e.g., obesity).<sup>10-15</sup> The epidemiological studies reporting these associations, however, typically lack the depth of measurement present in a study such as the NICHD SECCYD, precluding opportunities to pinpoint the processes and mechanisms underlying these effects, but see studies.<sup>16-19</sup> As examples, areas of measurement uniquely available at scale in the NICHD SECCYD include repeated, multi-method assessments of attachment security, parenting sensitivity, childcare quality, and nuances of early educational environments as well as child-level assessments of intelligence, temperament, and social relationships. Moreover, a focus on upstream factors relevant to later life health is a growing imperative as traditional disease-focused approaches targeting the remediation of poor health in adulthood are simply not working. The United States, compared to other high-income countries, ranks the lowest in life expectancy, the highest in infant mortality, and has the highest percentage of adults who are overweight or obese,<sup>20-22</sup> itself a significant predictor of morbidity and mortality.<sup>23-25</sup> All the while, spending on healthcare exceeds \$3 trillion USD per year.<sup>26,27</sup> These worsening trends underscore the profound need to move away from conventional strategies for intervention to instead consider how early life risk and resilience factors may be leveraged in the context of primary prevention efforts.



1  
2  
3 The objective of the current study was to actualize the potential of the NICHD SECCYD by conducting a  
4 follow-up assessment of the now adult participants (ages 26-31 years). This follow-up, re-branded The Study of  
5 Health in Early and Adult Life (SHINE) focused on the collection of detailed health information, using gold  
6 standard methods for the assessment of blood pressure and anthropometrics, the ascertainment of blood and  
7 hair samples, the implementation of 24-hour diet recall interviews and 7-day actigraphy for activity/sleep  
8 monitoring, and the completion of comprehensive self-report questionnaires in multiple areas of health and  
9 well-being. The availability of these measures will make possible the pursuit of prospective research questions  
10 linking the wealth of existing data characterizing the early life environments of the participants as children and  
11 adolescents with the newly collected data characterizing the health status of the participants now as adults.  
12 Here, in the current report, we present results describing these adulthood health measures and outline our  
13 analytical plans to test a series of life course models integrating the NICHD SECCYD and SHINE data. Additionally,  
14 we also discuss our unique experiences and lessons learned during the SHINE data collection in which we faced  
15 many challenges conducting in-person health assessments among participants living in distant locations  
16 throughout the United States and in a period overlapping with the COVID-19 pandemic.  
17  
18  
19  
20  
21  
22  
23  
24  
25  
26  
27

## 28 **COHORT DESCRIPTION**

### 31 **Sample overview:**

32  
33 Participants in the current study were originally recruited at birth as a part of the NICHD SECCYD, a  
34 prospective study of children and their families followed between birth and adolescence to examine trajectories  
35 of child health and development.<sup>1</sup> Families were from 10 geographically diverse study sites in the United States:  
36 Seattle, WA; Madison, WI; Irvine, CA; Pittsburgh, PA; Wellesley, MA; Little Rock, AR; Philadelphia, PA;  
37 Morganton, NC; Lawrence, KS; and Charlottesville, VA. In the first 11 months of 1991, all mother-infant dyads of  
38 babies born within preselected 24-hour intervals at participating hospitals were screened. Exclusion criteria  
39 were mother <18 years old, non-English speaking, or had a substance use disorder; serious medical problems  
40 (mother or infant); lived >1 hour from the study site; child being placed for adoption; concurrent participation in  
41 another study; and refusal to participate in initial screening. Additional sampling requirements were imposed  
42 (e.g., 10% recruitment of single parent households) to ensure that the sociodemographic composition of the  
43 final sample (N=1364 families; n=659 girls [48.3%] and n=705 boys [51.7%]) was proportionate to the population  
44 in the same geographic regions, according to the 1990 US Census.  
45  
46  
47  
48  
49  
50  
51  
52  
53  
54  
55  
56  
57  
58  
59  
60

1  
2  
3 Following completion of the original NICHD SECCYD data collection at age 15 years, 946 adolescent  
4 participants and their parents agreed to be re-contacted for future research studies. Additional research  
5 contacts occurred at participant ages 17-18 years, age 22 years, and ages 26-27 years, after which time 930  
6 young adults remained in the sample. This reduction in sample size was due to 14 participants who rescinded  
7 their consent for future contact and 2 participants who died. Among these 930 subjects, 3 additional  
8 participants died subsequently, leaving 927 participants available for recruitment in the current study. All  
9 participant deaths were confirmed by death records, obituaries, or verbal confirmation by parents.  
10  
11  
12  
13  
14  
15

16  
17 The current study, a follow-up to the NICHD SECCYD re-branded SHINE, located these now young adults  
18 (n=927, ages 26-31) to complete an in-person study visit. Extensive social, behavioral, and health data were  
19 collected with the goal of testing effects of early life exposures, and the mechanisms of these effects, on  
20 trajectories of health and disease risk over time. The current study is the first among the existing NICHD SECCYD  
21 data collection efforts to engage the participants as adults and with an in-depth, in-person protocol focused on  
22 the assessment of cardiometabolic health specifically. The current study is also unique in its design and  
23 methodological approach as it was led by a single research team at the University of Washington (UW) who  
24 oversaw the in-person data collection at numerous locations throughout the United States. To execute the study  
25 from a distance, and during the COVID-19 pandemic, many useful adaptations were developed, some originating  
26 from experiences of failure that are shared here as lessons to other investigators interested in conducting  
27 similar work (see details in Challenges and lessons learned section below).  
28  
29  
30  
31  
32  
33  
34  
35  
36

37 Informed consent and assent for the original NICHD SECCYD were obtained from parents and children,  
38 respectively. Informed consent for the NICHD SECCYD follow-up study, SHINE, was obtained from the now adult  
39 target participants. For the NICHD SECCYD, the research was approved by the Institutional Review Boards (IRB)  
40 of each university-based study site. For SHINE, the research was approved by the Human Subjects Division of the  
41 University of Washington. All methods were carried out in accordance with relevant guidelines and regulations.  
42  
43  
44  
45  
46

#### 47 **Participation rates:**

48 The 927 participants (468 [50.5%] women, 459 men [49.5%]) available for recruitment in the current  
49 study were contacted using information from prior assessments. Contacts were initiated via email, phone, text,  
50 or social media, including Facebook and LinkedIn. Efforts to update participant contact information included  
51 reaching out to alternative contacts such as parents or grandparents, searching social media sites, mailing  
52 postcards to physical addresses, and using free (with pay option) open services such as White Pages, as well as  
53  
54  
55  
56  
57  
58  
59  
60

1  
2  
3 paid, secured services such as LexisNexis and TransUnion. Over time, various strategies were used to further  
4 incentivize participation, including increasing the study payment, offering payment for screening, engaging  
5 participants through newsletters and e-cards, and developing alternate protocols that allowed flexibility in  
6 completing only portions of the study or in completing some portions of the study remotely and independently.  
7  
8  
9

10  
11 Extensive recruitment efforts resulted in the following participation rates. In the full sample, 705 (of  
12 927; 76.1%) individuals participated in the study. Of the 222 non-participants, 31 (13.9%) declined, primarily due  
13 to being too busy, 6 (2.7%) rescinded their consent for future contact, 79 (35.6%) were initially engaged but did  
14 not follow up, 90 (40.5%) were unresponsive to all contact efforts (using contact information that was presumed  
15 to be valid but was not verified), 13 (5.9%) had no contact information, and 3 (1.4%) were confirmed to be  
16 incarcerated during the period of recruitment. With respect to sex assigned at birth, 378 (of 468; 80.8%) women  
17 and 327 (of 459; 71.2%) men participated in the study, reflecting a significant difference in rates of participation  
18 with women more likely to participate ( $\chi^2(1, N=927) = 11.5, p < .001$ ). Five participants no longer identified as the  
19 sex assigned at birth. Instead, two participants identified as transgender male, one as transgender female, and  
20 two as non-binary. Finally, participation rates by original recruitment site were as follows: Seattle, WA (88.1%);  
21 Madison, WI (75.5%); Irvine, CA (76.2%); Pittsburgh, PA (76.6%); Wellesley, MA (67.0%); Little Rock, AR (85.2%);  
22 Philadelphia, PA (71.9%); Morganton, NC (65.3%); Lawrence, KS (79.6%); and Charlottesville, VA (78.3%).  
23 However, reports of rates by original recruitment site are misleading insofar as a sizable proportion of  
24 participants (221 [31.3%]) had relocated and completed the protocol at a different main or ancillary site or  
25 chose to complete one of the remote protocols even if they were within travel distance. Of note, all subjects  
26 were offered paid travel accommodations to reduce barriers to in-person participation.  
27  
28  
29  
30  
31  
32  
33  
34  
35  
36  
37  
38  
39

#### 40 **Data collection overview:**

41 All participants were engaged using an introductory letter describing the study, followed by phone and  
42 email contacts. Exclusions were temporary, including pregnancy or breastfeeding and current/recent cold or flu,  
43 and participants were followed and re-screened as necessary to identify changes in eligibility. Women who were  
44 not using medications affecting their menstrual cycle, and who could predict the start of their period within 5  
45 days, were scheduled to participate in the early follicular phase between menstrual cycle days 2-7. All  
46 participants were invited to participate in the full study protocol with paid accommodations for travel offered  
47 when necessary. However, based on participant preferences and circumstances, alternate study protocols were  
48 also developed to reduce the time/burden of study participation. Of the 705 participants, 551 (78.2%)  
49 participated in the full study protocol which entailed an in-person home visit (3-4 hours) and two post-visit  
50  
51  
52  
53  
54  
55  
56  
57  
58  
59  
60

1  
2  
3 activities occurring over a 1- to 2-week period. Sixteen (2.3%) participated in the partial study protocol, which  
4 entailed a standard subset of study activities. Ninety-nine (14.0%) participated in the self-administered study  
5 protocol, which entailed a standard subset of study activities that could be performed by the participant  
6 remotely and independently. Finally, 39 (5.5%) completed the study questionnaires only. See details in the 'Data  
7 collection protocols' section below.  
8  
9  
10

11  
12  
13 The structure of the data collection both retained and built on the 10 original recruitment sites. At each  
14 of these 10 main sites, a data collector and mobile phlebotomist were hired and trained to administer the study  
15 protocol. The study visits occurred primarily in the homes of the participants. However, based on the locations  
16 of participants, at times, a central location for data collection was established (e.g., in a rented professional  
17 office space) and the participants would travel to the data collection team. After each study visit, all associated  
18 research materials were returned to the UW research team in Seattle WA who managed and oversaw the data  
19 collection efforts at all locations throughout the study period. At the study visit, collected data were entered  
20 into the online data capture tool, REDCap, making them available to the UW research team in real-time. Limited  
21 paperwork and the hair samples were shipped by regular mail and the processed blood samples were  
22 immediately placed on dry ice and shipped overnight by FedEx. The UW research team also conducted all of the  
23 post-visit research activities as well as the three study protocols that did not have an in-person component.  
24  
25  
26  
27  
28  
29  
30  
31

32  
33 All data collectors and mobile phlebotomists received intensive training led by MEB and the UW  
34 research team. The data collector training included human subjects research training (online), formal orientation  
35 to the study procedures (online), and a 2-day in-person training session at UW. The first day focused on training  
36 for each protocol segment and the second day required the successful execution of the full study protocol on a  
37 practice participant to receive certification. The mobile phlebotomist training included human subjects research  
38 training (online), formal training on the blood collection and blood processing procedures (online), and a 1-day  
39 in-person training session at UW. The in-person training required the successful execution of the blood  
40 collection and blood processing procedures on a practice participant to receive certification. For both the data  
41 collector and mobile phlebotomist, as needed, additional training was offered in-person and online and practice  
42 supplies were provided for independent practice before beginning data collection. After data collection began,  
43 all data collection materials and samples were inspected by the UW research team, research visits were  
44 observed periodically via Zoom, and constructive feedback was provided throughout the period of data  
45 collection.  
46  
47  
48  
49  
50  
51  
52  
53  
54  
55  
56  
57  
58  
59  
60

1  
2  
3 The 10 main data collection sites were set up over time in this order: Seattle, WA (started January 2018);  
4 Madison, WI (started May 2018); Irvine, CA (started May 2018); Pittsburgh, PA (started October 2018);  
5 Wellesley, MA (started November 2018); Little Rock, AR (started March 2019); Philadelphia, PA (started March  
6 2019); Morganton, NC (started June 2019); Lawrence, KS (started July 2019); and Charlottesville, VA (started  
7 February 2020). Once a site was set up, it generally remained open. However, intermittent disruptions were  
8 experienced based on turnover among the data collectors/mobile phlebotomists and the COVID-19 pandemic.  
9 All sites were open for at least 2 years, ranging between 2-4 years.  
10  
11  
12  
13  
14  
15

16 In addition, based on the locations of participants outside of these 10 main sites, several ancillary sites  
17 were set up. A data collector and mobile phlebotomist from one of the main sites traveled to the indicated  
18 ancillary site to conduct the study protocol among a pre-identified 'cluster' of participants over a period of days.  
19 The ancillary data collection sites included the following: San Francisco Bay Area (2019); San Jose, CA (2019);  
20 Denver, CO (2020); Atlanta, GA (2020); Washington, DC (2020); New York, NY (two times in 2021); Portland, OR  
21 (2019, 2021); Kansas City, MO (2021); and Nashville, TN (2021).  
22  
23  
24  
25  
26  
27

### 28 **Data collection protocols:**

29  
30 **Full study protocol.** The full study protocol entailed an in-person home visit (3-4 hours) and two post-  
31 visit activities occurring over a 1- to 2-week period. The in-person home visit was scheduled in the morning  
32 between 7 am and 10 am local time and included the measurement of blood pressure and anthropometrics  
33 (height, weight, and waist and hip circumferences), the collection of blood and hair samples, participation in one  
34 24-hour diet recall interview, and the completion of self-report questionnaires in areas of health and well-being.  
35 The post-visit activities included participation in two additional 24-hour diet recall interviews (by phone) and  
36 completion of activity/sleep monitoring using an activity monitor worn 24 hours/day over a 7-day period.  
37  
38  
39  
40  
41  
42

43 **Partial study protocol.** The 'partial' study protocol included participation in three 24-hour diet recall  
44 interviews (by phone), completion of the self-report questionnaires (online), and completion of activity/sleep  
45 monitoring using an activity monitor worn 24 hours/day over a 7-day period. Therefore, in the 'partial' study  
46 protocol, data are missing for the assessment of blood pressure and anthropometrics as well as the collection of  
47 blood and hair samples. Among the 16 (2.3%) participants who completed this protocol, 6 (37.5%) did so  
48 because they were living outside of the US and the remainder expressed miscellaneous reasons for their  
49 preference for this protocol.  
50  
51  
52  
53  
54  
55  
56  
57  
58  
59  
60

1  
2  
3 Self-administered study protocol. The 'self-administered' study protocol included the study protocol  
4 segments that could be performed by the participant remotely and independently, albeit with support and  
5 oversight by the UW research team. These segments included the measurement of blood pressure and  
6 anthropometrics (height, weight, and waist and hip circumferences), participation in three 24-hour diet recall  
7 interviews (by phone), completion of the self-report questionnaires (online), and completion of activity/sleep  
8 monitoring using an activity monitor worn 24 hours/day over a 7-day period. Participants were provided all the  
9 supplies/equipment (e.g., blood pressure monitor, flat scale, tape measure, and activity monitor) and detailed  
10 instructions necessary to complete this protocol at home. Real-time support was provided by the UW research  
11 team over phone/email at the time of the collection. Participants were also provided videos produced by the  
12 UW research team that demonstrated the correct method of taking the blood pressure and anthropometric  
13 measures. The self-administered study protocol was developed, in part, in response to the COVID-19 pandemic,  
14 allowing data collection to continue without having in-person contact with the participants. Therefore, in the  
15 'self-administered' protocol, data are missing for the collection of blood and hair samples. Among the 99 (14.0%)  
16 participants who completed this protocol, the majority (90 [90.9%]) did so because they lived in locations that  
17 were distant from one of the main or ancillary data collection sites and they did not want to travel to the site,  
18 even though paid travel accommodations were offered. The remainder expressed miscellaneous reasons for  
19 their preference for this protocol.  
20  
21  
22  
23  
24  
25  
26  
27  
28  
29  
30  
31  
32

33 Questionnaires only study protocol. The 'questionnaires-only' study protocol included completion of the  
34 self-report questionnaires online with real-time support and follow-up offered by the UW research team.  
35 Therefore, in the 'questionnaires only' protocol, data are missing for all of the other study assessments (i.e.,  
36 blood pressure, anthropometrics, blood and hair samples, 24-hour diet recall interviews, and the activity  
37 monitor). Among the 39 (5.5%) participants who completed this protocol, the majority (29 [74.4%]) responded  
38 to the questionnaire link without communicating with the study team directly and the remainder expressed  
39 miscellaneous reasons for their preference for this protocol.  
40  
41  
42  
43  
44  
45  
46

47 Across the study protocols, with respect to the main data collection components, complete data are  
48 available for 647 (91.8%) participants for the blood pressure assessment, 664 (94.2%) participants for the  
49 anthropometric assessment, 527 (74.8%) participants for the blood collection, 468 (66.4%) participants for the  
50 hair collection, 700 (99.3%) for the self-report questionnaires, 664 (94.2%) participants for at least one 24-hour  
51 diet recall interview, and 581 (82.4%) participants for the valid wear of the activity monitor.  
52  
53  
54  
55  
56  
57  
58  
59  
60

1  
2  
3 **Available data:**  
4

5 Blood pressure assessment. The circumference of the participant's bare upper arm was measured first  
6 to enable selection of the correct cuff size. Next, the participant was directed to sit at a table in a relaxed  
7 position with legs uncrossed, feet flat on the floor, and no talking for a 5-minute rest period. Following the rest  
8 period, the pre-selected cuff was correctly positioned on the left arm with the arm resting on the table at heart  
9 level. A research grade, automated blood pressure monitor was used, pre-programmed to take three  
10 consecutive measurements with one minute in between readings. The cuff was then re-positioned on the right  
11 arm and the measurements were repeated.  
12  
13  
14  
15  
16  
17

18 Anthropometric assessment. The participant was directed to remove shoes, all excess clothing and  
19 accessories, and any items from pockets. First, a research grade flat scale was positioned on a hard surfaced  
20 floor to measure weight. Next, a research grade stadiometer was assembled and positioned against an open  
21 wall to measure height. The height measurement was taken with the participant's heels, hips, shoulders, and  
22 head aligned along the back of the stadiometer. Finally, a tension-controlled tape measure was positioned at the  
23 midpoint between the iliac crest and lowest rib to measure waist circumference (on the exhalation) and re-  
24 positioned at the widest point of the hips to measure hip circumference.  
25  
26  
27  
28  
29  
30

31 Blood sample collection. The participant's blood was drawn from the arm in a seated or supine position  
32 by a trained phlebotomist. The blood draw occurred in the morning between 7 am and 10 am following an  
33 overnight fast starting at 9 pm. Other restrictions included cessation of exercise, alcohol intake, and  
34 nonessential cold/allergy and headache medications 12 hours prior, the cessation of caffeine 8 hours prior, and  
35 the cessation of nicotine 1 hour prior. Following the draw, the blood was processed and aliquoted on site. The  
36 samples were then placed on dry ice and packaged for shipment by FedEx overnight to the UW research team  
37 who received and stored them at -80 degrees Celsius for later analysis.  
38  
39  
40  
41  
42  
43  
44

45 Hair sample collection. The target area on the participant's head (posterior vertex) was identified and 2  
46 to 3 'bundles' of hair were tied off in this region, together equaling in quantity the diameter of a standard  
47 writing pen. These bundles were then cut close to the scalp and affixed to a pre-prepared foil envelope for  
48 shipment by regular mail to the UW research team who inspected and stored the hair samples at room  
49 temperature for later analysis. If necessary, hair outside of the target area was taken, excluding facial hair or hair  
50 along the hairline. Participants also completed a self-report questionnaire regarding hair washing and use of hair  
51 care products and styling tools.  
52  
53  
54  
55  
56  
57  
58  
59  
60

1  
2  
3  
4  
5 Diet recall interviews. The participant's dietary intake over the prior 24 hours was assessed using the  
6 computer-based Automated Self-Administered 24-Hour Dietary Assessment (ASA24).<sup>28</sup> One ASA24 interview was  
7 conducted in-person and two others were conducted over the phone, all occurring over a one-week period with  
8 one interview referencing a weekend day. Data collected through these interviews was scored using the Healthy  
9 Eating Index-2015 (HEI) scoring system developed by the United States Department of Agriculture.<sup>29</sup> This scoring  
10 system produces an overall diet quality score as well as 13 values related to key nutrients or food components  
11 based on United States Department of Health & Human Services 2015-2020 Dietary Guidelines.  
12  
13  
14  
15  
16  
17

18 Activity monitor wear. The participant was directed to wear an activity monitor on the right hip during  
19 the day for the assessment of activity and on the wrist of the nondominant hand during the night for the  
20 assessment of sleep. The duration of wear was 24 hours per day for seven consecutive days, including two  
21 weekend days. The participant completed a log during this period, recording wake and sleep times each day.  
22 Additional instructions were provided regarding the removal of the device when exposed to water. The data  
23 were then scored using proprietary software to derive activity variables such as moderate/vigorous activity,  
24 number of steps, and sedentary time as well as sleep variables such as sleep latency, duration, and awakenings.  
25  
26  
27  
28  
29  
30

31 Self-report questionnaires. The participant completed a comprehensive set of self-report questionnaires  
32 using the online data capture tool, REDCap. The participant was assisted by the UW research team who provided  
33 oversight, general support, and referrals to diverse support services. In summary, the questionnaires pertained  
34 to sociodemographic and neighborhood characteristics; medical, reproductive, and psychiatric history; health  
35 behaviors in areas of smoking, exercise, nutrition, and sleep; cognitive function in areas of executive functioning  
36 and decision-making; stress, adverse events, and psychological well-being, including depression and anxiety  
37 symptoms; and family composition and family, social, and romantic relationships.  
38  
39  
40  
41  
42  
43  
44

45 Figure 1 summarizes available data from the current study, SHINE, as well as the original NICHD SECCYD  
46 in the context of the timeline of these data collections.  
47  
48  
49

### 50 **Challenges and lessons learned:**

51  
52 The study's original efforts to implement phlebotomy services in the numerous locations of the study  
53 participants included use of advertised mobile phlebotomy companies. These efforts failed, however, as such  
54 companies were not able to provide well-trained phlebotomists, were not able to provide coverage for the  
55  
56  
57  
58  
59  
60



1  
2  
3 geographical locations of the participants and were not positioned to properly train their employees to perform  
4 the study protocol. As a result, the study transitioned to an independent contractor model in which mobile  
5 phlebotomists were sought through indeed.com, interviewed and trained remotely, and then brought to UW to  
6 be certified in the proper implementation of the blood collection and blood processing protocols. As  
7 independent contractors, the mobile phlebotomists were provided liability insurance, a centrifuge if needed,  
8 and all indicated supplies. Otherwise, expenses such as gas mileage were covered in their contracts as a part of  
9 their per participant payment. Although the independent contractor model required more time for recruitment,  
10 training, and on-going administrative tasks related to contracts and invoicing, it was superior to other options  
11 and produced a higher quality blood sample collection.  
12  
13  
14  
15  
16  
17  
18  
19

20 In a related issue, the study's original efforts to freeze and ship the blood samples included attempts to  
21 find common in-field storage locations that could store and send the samples in batch as they accumulated.  
22 These efforts failed, however, as few lab entities offered such services, it was impossible to cover the  
23 geographical locations of the participants, and any available services were cost prohibitive. As a result, the study  
24 transitioned to the use of dry ice with individual blood sample shipments sent by the mobile phlebotomist after  
25 each study visit. The challenges associated with this approach included limited availability of dry ice in some  
26 geographical areas, human error in measuring the correct quantity of dry ice, and variability in the proximity of  
27 FedEx facilities that accept packages containing dry ice. Despite these challenges, this approach overall was  
28 superior to other options. In all, seven shipments arrived thawed, three due to human error (not enough dry ice)  
29 and four due to FedEx delays. However, an add-on protocol in which participants were asked to do a second  
30 blood draw if needed was used to re-draw samples for five participants, leaving only two participants with  
31 ruined samples. Additional compensatory efforts were developed to use 'extra' dry ice and to avoid shipments  
32 around holiday times and bad weather.  
33  
34  
35  
36  
37  
38  
39  
40  
41  
42

43 A final main challenge, not unique to the current study, pertained to the COVID-19 pandemic. In mid-  
44 2020, following a university mandated 3-month discontinuation of all in-person research, the current study  
45 faced the decision of whether to resume in-person research. At this crossroads, the 'self-administered' study  
46 protocol was developed to offer participants an option to complete the study assessments that were able to be  
47 completed remotely and independently. As a part of this protocol, extensive work was put into the construction  
48 of custom shipping boxes to send supplies and equipment (e.g., blood pressure monitor, flat scale) and the  
49 development of a website that housed videos and special instructions regarding the correct collection of each  
50 measure. Although this protocol, by definition, meant the blood and hair sample collections would be missing, it  
51  
52  
53  
54  
55  
56  
57  
58  
59  
60

allowed the study to move forward with another assessment approach in its toolkit. Moreover, the 'self-administered' protocol remains broadly useful for all research conducted from a distance. Subsequently, additional add-on protocols were devised to collect the in-person data missed during this period.

### **Patient and public involvement:**

No patient or public involvement.

### **FINDINGS TO DATE**

The sociodemographic characteristics of the sample are described in Table 1. On average, the participants were 28.6 years of age (range: 26.2-31.3 years). With respect to ethnicity, 6.4% were Hispanic and 93.6% non-Hispanic, while the examination of race showed 14.9% belonged to historically marginalized groups, including 10.2% Black, 1.1% Asian/Pacific Islander, and 0.2% American Indian/Alaska Native (Eskimo, Aleutian) as well as 3.4% who were mixed race. Most participants (71.6%) reported being in a current romantic relationship and 26.1% had at least one child. Overall, the sample was well-educated with 55.6% of participants, including 58.5% of women and 52.2% of men, having a college degree or greater. This compares to 40.0% in the population, according to 2019 US Census reports of educational attainment among individuals between 25-34 years.<sup>30</sup> Notably, 13.6% of participants were current students, full or part-time. Of these, 69.5% were pursuing degrees at the college level or greater. If the anticipated degrees are obtained, the number of participants with a college degree or greater will grow to 59.6% of the full sample, and 64.0% of women and 54.3% of men. In addition, 39.4% of participants reported an individual income of \$50,000 or greater and 30.1% of participants reported a household income of \$100,000 or greater. Only 2.9% of participants indicated that paying for basics such as food was 'very' or 'extremely' difficult and only 9.6% of participants were living below the poverty line. However, 38.3% of participants reported they would not be able to maintain their current standard of living for more than 2 months if they lost their income, reflecting some financial instability. In sum, inspection of the sociodemographic characteristics of the sample revealed an overall pattern of relative socioeconomic advantage among the participants on most parameters of education and income.

Table 1. Description of sociodemographic characteristics in the full sample and in women and men separately.

|                        | <b>Total<sup>†</sup></b><br><b>(n=705)</b><br>N (%) or mean (SD), range | <b>Women<sup>†</sup></b><br><b>(n=378)</b><br>N (%) or mean (SD), range | <b>Men<sup>†</sup></b><br><b>(n=327)</b><br>N (%) or mean (SD), range |
|------------------------|-------------------------------------------------------------------------|-------------------------------------------------------------------------|-----------------------------------------------------------------------|
| <b>Age (in years)</b>  | 28.6 (1.2), 26.2-31.3                                                   | 28.7 (1.2), 26.2-31.2                                                   | 28.6 (1.2), 26.4-31.3                                                 |
| <b>Race/ethnicity:</b> |                                                                         |                                                                         |                                                                       |

|                                           |                                           |                                           |                                           |
|-------------------------------------------|-------------------------------------------|-------------------------------------------|-------------------------------------------|
| Hispanic                                  | 45 (6.4%)                                 | 19 (5.0%)                                 | 26 (8.0%)                                 |
| White, non-Hispanic                       | 555 (78.7%)                               | 303 (80.1%)                               | 252 (77.0%)                               |
| Black, non-Hispanic                       | 72 (10.2%)                                | 40 (10.6%)                                | 32 (9.8%)                                 |
| Asian/PI, non-Hispanic                    | 8 (1.1%)                                  | 4 (1.1%)                                  | 4 (1.2%)                                  |
| AI/AN, non-Hispanic                       | 1 (0.2%)                                  | 0 (0.0%)                                  | 1 (0.3%)                                  |
| Mixed race, non-Hispanic                  | 24 (3.4%)                                 | 12 (3.2%)                                 | 12 (3.7%)                                 |
| <b>Family composition:</b>                |                                           |                                           |                                           |
| People living in home                     | 2.7 (1.4), 1-10                           | 2.8 (1.4), 1-10                           | 2.5 (1.3), 1-7                            |
| Married or living as married              | 241 (34.4%)                               | 150 (39.7%)                               | 91 (28.3%)                                |
| Current romantic relationship             | 501 (71.6%)                               | 295 (78.0%)                               | 206 (64.0%)                               |
| One or more children                      | 183 (26.1%)                               | 123 (32.5%)                               | 60 (18.6%)                                |
| <b>Education:</b>                         |                                           |                                           |                                           |
| Less than HS diploma                      | 7 (1.0%)                                  | 1 (0.3%)                                  | 6 (1.9%)                                  |
| HS diploma/GED                            | 88 (12.6%)                                | 41 (10.8%)                                | 47 (14.6%)                                |
| Some college, AA, certificate, trade      | 216 (30.8%)                               | 115 (30.4%)                               | 101 (31.3%)                               |
| College degree or greater                 | 389 (55.6%)                               | 221 (58.5%)                               | 168 (52.2%)                               |
| <b>Student status:</b>                    |                                           |                                           |                                           |
| Part-time                                 | 34 (4.9%)                                 | 24 (6.4%)                                 | 10 (3.1%)                                 |
| Full-time                                 | 61 (8.7%)                                 | 43 (11.4%)                                | 18 (5.6%)                                 |
| <b>Employment:</b>                        |                                           |                                           |                                           |
| Part-time, for pay                        | 85 (12.1%)                                | 59 (15.6%)                                | 26 (8.1%)                                 |
| Full-time, for pay                        | 516 (73.7%)                               | 256 (67.7%)                               | 260 (80.7%)                               |
| <b>Individual income:</b>                 |                                           |                                           |                                           |
| <\$10,000                                 | 78 (11.1%)                                | 48 (12.7%)                                | 30 (9.3%)                                 |
| \$10,000-\$29,999                         | 167 (23.9%)                               | 104 (27.5%)                               | 63 (19.6%)                                |
| \$30,000-\$49,999                         | 179 (25.6%)                               | 89 (23.5%)                                | 90 (27.9%)                                |
| \$50,000-\$99,999                         | 213 (30.4%)                               | 111 (29.4%)                               | 102 (31.7%)                               |
| \$100,000+                                | 63 (9.0%)                                 | 26 (6.9%)                                 | 37 (11.5%)                                |
| <b>Household income:</b>                  |                                           |                                           |                                           |
| <\$20,000                                 | 75 (10.8%)                                | 43 (11.4%)                                | 32 (10.0%)                                |
| \$20,000-\$49,999                         | 163 (23.5%)                               | 90 (23.9%)                                | 63 (22.9%)                                |
| \$50,000-\$99,999                         | 248 (35.7%)                               | 127 (33.8%)                               | 121 (37.9%)                               |
| \$100,000-\$149,999                       | 126 (18.1%)                               | 74 (19.7%)                                | 52 (16.3%)                                |
| \$150,000+                                | 83 (11.9%)                                | 42 (11.2%)                                | 41 (12.9%)                                |
| <b>Financial disadvantage:</b>            |                                           |                                           |                                           |
| Very/extreme difficulty paying for basics | 20 (2.9%)                                 | 14 (3.7%)                                 | 6 (1.9%)                                  |
| <2-month safety net if lost income        | 268 (38.3%)                               | 149 (39.6%)                               | 119 (37.1%)                               |
| Adjusted household income*                | \$46,176 (\$36,509),<br>\$1,667-\$287,500 | \$43,312 (\$33,467),<br>\$1,667-\$162,500 | \$49,552 (\$39,586),<br>\$2,500-\$287,500 |
| Income-to-needs ratio*                    | 4.7 (3.5), 0.3-22.0                       | 4.6 (3.5), 0.3-17.8                       | 4.8 (3.5), 0.3-22.0                       |
| Income below the poverty line             | 67 (9.6%)                                 | 38 (10.1%)                                | 29 (9.1%)                                 |
| Income 1.0-1.9 times the poverty line     | 95 (13.7%)                                | 62 (16.5%)                                | 33 (10.3%)                                |
| Income 2.0-2.9 times the poverty line     | 86 (12.4%)                                | 42 (11.2%)                                | 44 (13.8%)                                |
| Income ≥3 times the poverty line          | 447 (64.3%)                               | 234 (62.2%)                               | 213 (66.8%)                               |

Abbreviations: PI=Pacific Islander; AI=American Indian; AN=Alaska Native; HS=high school; GED=general equivalency diploma; AA=Associates degree.

†Missing data: 5 participants did not complete the questionnaire items pertaining to family composition, education, employment, and individual income. 7 participants did not complete the questionnaire items pertaining to student status. 10 participants did not complete the questionnaire items pertaining to household income.

\*Definitions: Adjusted household income is the total household income divided by the number of individuals identified as being dependent on the income. Income-to-needs ratio is the total household income divided by the US Census poverty threshold for the number of individuals identified as being dependent on the income without respect to their relation to one another.

Information pertaining to the cardiometabolic health status of the sample is described in Table 2. Each health status indicator is first presented as a continuous variable and then as a categorical variable, coded according to established clinical guidelines. On average, the participants were overweight (mean BMI=27.8) with 52.7% of women and 63.4% of men in overweight/obese categories. Within the obese category, 5.9% of women and 6.4% of men were considered class III or severely obese. Compared to national estimates in similar-age groups (20-39 years), the percent of obese participants in the current study (29.8%) was comparable to the percent obese in the National Health Interview Survey (NHIS) (i.e., 28.5%)<sup>31</sup> but was lower than in the National Health and Nutrition Examination Survey (NHANES) (i.e., 39.8%).<sup>32</sup> In addition, in line with the distribution of BMI, 53.0% were in the high/very high range for waist circumference, reflecting significant central adiposity in the sample. With respect to blood pressure, 23.6% of women and 35.9% of men were hypertensive according to the American College of Cardiology and American Heart Association guidelines (SBP  $\geq$ 130 or DBP  $\geq$ 80), exceeding national estimates reported in NHANES (i.e., 13.0% in women and 31.2% in men) among individuals 18-39 years.<sup>33</sup> Moreover, a substantial number of women, 6.4% and 29.0%, were in the pre-diabetic (A1c 5.7%-6.4%) and diabetic (A1c  $>$ 6.4%) ranges, respectively, for hemoglobin A1c as were 7.0% and 22.1% of the men, respectively. As with hypertension, these numbers exceed national estimates reported in NHANES (i.e., 13% diabetic) among individuals 18 years of age or older.<sup>34</sup> In sum, inspection of the health status indicators in the sample revealed a distinct pattern of poor cardiometabolic health with a sizable proportion of the sample displaying values in clinically meaningful risk ranges, especially in areas of obesity, hypertension, and diabetes.

Table 2. Description of health status indicators in the full sample and in women and men separately.

|                                 | <b>Total<sup>†</sup></b><br><b>(n=705)</b><br>N (%) or mean (SD), range | <b>Women<sup>†</sup></b><br><b>(n=378)</b><br>N (%) or mean (SD), range | <b>Men<sup>†</sup></b><br><b>(n=327)</b><br>N (%) or mean (SD), range |
|---------------------------------|-------------------------------------------------------------------------|-------------------------------------------------------------------------|-----------------------------------------------------------------------|
| <b>Body Mass Index (BMI)</b>    |                                                                         |                                                                         |                                                                       |
| BMI (kg/m <sup>2</sup> )        | 27.8 (7.1), 16.7-65.9                                                   | 27.5 (7.2), 16.7-59.3                                                   | 28.2 (6.9), 16.8-65.9                                                 |
| Underweight, <18.5              | 13 (1.9%)                                                               | 9 (2.5%)                                                                | 4 (1.3%)                                                              |
| Normal, 18.5-24.9               | 268 (40.4%)                                                             | 158 (44.8%)                                                             | 110 (35.3%)                                                           |
| Overweight, 25.0-29.9           | 185 (27.9%)                                                             | 79 (22.4%)                                                              | 106 (34.1%)                                                           |
| Obese, $>$ 30.0                 | 198 (29.8%)                                                             | 107 (30.3%)                                                             | 91 (29.3%)                                                            |
| Class I obesity, 30.0-34.9      | 101 (15.2%)                                                             | 56 (15.9%)                                                              | 45 (14.5%)                                                            |
| Class II obesity, 35.0-39.9     | 56 (8.4%)                                                               | 30 (8.5%)                                                               | 26 (8.4%)                                                             |
| Class III obesity, 40.0+        | 41 (6.2%)                                                               | 21 (5.9%)                                                               | 20 (6.4%)                                                             |
| <b>Waist Circumference (WC)</b> |                                                                         |                                                                         |                                                                       |

|                                        |                          |                          |                          |
|----------------------------------------|--------------------------|--------------------------|--------------------------|
| WC (cm)                                | 92.2 (17.8), 62.2-180.0  | 87.9 (16.4), 62.2-149.4  | 97.1 (18.2), 64.6-180.0  |
| High: 80-88 cm, women; 94-102 cm, men  | 115 (17.7%)              | 60 (17.3%)               | 55 (18.2%)               |
| Very high: >88 cm, women; >102 cm, men | 229 (35.3%)              | 146 (42.2%)              | 83 (27.4%)               |
| <b>Blood Pressure (BP)</b>             |                          |                          |                          |
| Systolic BP (SBP) (mmHg)               | 115.2 (12.9), 83.7-167.3 | 109.5 (11.0), 83.7-153.3 | 121.6 (11.8), 84.7-167.3 |
| Diastolic BP (DBP) (mmHg)              | 73.1 (10.2), 45.7-104.0  | 72.4 (10.1), 48.7-99.3   | 73.9 (10.2), 45.7-104.0  |
| SBP ≥130 mmHg or DBP ≥80 mmHg          | 190 (29.4%)              | 81 (23.6%)               | 109 (35.9%)              |
| <b>Total Cholesterol</b>               |                          |                          |                          |
| Total cholesterol (mg/dL)              | 169.1 (33.7), 83-296     | 167.4 (31.7), 85-289     | 171.1 (35.8), 83-296     |
| Total cholesterol, ≥200 mg/dL          | 94 (17.8%)               | 44 (15.5%)               | 50 (20.5%)               |
| <b>High-Density Lipoprotein (HDL)</b>  |                          |                          |                          |
| HDL (mg/dL)                            | 53.9 (13.3), 24-106      | 57.2 (12.6), 29-96       | 50.1 (13.1), 24-106      |
| HDL <50 mg/dL, women; <40 mg/dL, men   | 131 (24.9%)              | 78 (27.6%)               | 53 (21.7%)               |
| <b>Low-Density Lipoprotein (LDL)</b>   |                          |                          |                          |
| LDL (mg/dL)                            | 97.5 (29.5), 23-223      | 93.6 (27.4), 23-192      | 102.1 (31.2), 26-224     |
| LDL ≥130 mg/dL                         | 70 (13.3%)               | 26 (9.2%)                | 44 (18.0%)               |
| <b>Fasting Triglycerides</b>           |                          |                          |                          |
| Triglycerides (mg/dL)                  | 88.7 (55.8), 27-538      | 83.4 (47.4), 27-393      | 94.8 (63.6), 29-538      |
| Triglycerides, ≥150 mg/dL              | 48 (9.1%)                | 21 (7.4%)                | 27 (11.1%)               |
| <b>Fasting Glucose</b>                 |                          |                          |                          |
| Glucose (mg/dL)                        | 91.5 (18.9), 63-293      | 89.5 (18.1), 63-293      | 93.7 (19.5), 66-273      |
| Glucose ≥100 mg/dL                     | 41 (7.8%)                | 12 (4.2%)                | 29 (11.9%)               |
| <b>Fasting Insulin</b>                 |                          |                          |                          |
| Insulin (μIU/mL)                       | 10.0 (8.3), 0.1-70.2     | 10.2 (8.0), 0.6-67.6     | 9.8 (8.6), 0.1-70.2      |
| Insulin ≥20 μIU/mL                     | 43 (8.2%)                | 24 (8.5%)                | 19 (7.8%)                |
| <b>Hemoglobin A1c</b>                  |                          |                          |                          |
| HbA1c (%)                              | 5.3 (2.3), 0.6-23.3      | 5.3 (2.2), 0.6-17.1      | 5.2 (2.4), 1.3-23.3      |
| HbA1c normal, <5.7%                    | 355 (67.4%)              | 182 (64.3%)              | 173 (70.9%)              |
| HbA1c prediabetes, 5.7% - 6.4%         | 36 (6.8%)                | 19 (6.7%)                | 17 (7.0%)                |
| HbA1c diabetes, >6.4%                  | 136 (25.8%)              | 82 (29.0%)               | 54 (22.1%)               |
| <b>C-reactive Protein (CRP)</b>        |                          |                          |                          |
| CRP (mg/L)                             | 4.5 (4.4), 0.01-21.2     | 5.0 (4.6), 0.01-21.2     | 4.0 (4.0), 0.01-17.8     |
| CRP ≥10 mg/L                           | 65 (12.3%)               | 39 (13.8%)               | 26 (10.7%)               |

†Missing data: 41 participants do not have anthropometric data, 95.1% because they participated in a protocol that did not collect these data and 4.9% for a miscellaneous reason. 58 participants do not have blood pressure data, 94.8% because they participated in a protocol that did not collect these data and 5.2% for a miscellaneous reason. 178 participants do not have blood samples, 86.0% because they participated in a protocol that did not collect these data and 14.0% for a miscellaneous reason (e.g., refused the blood draw, sample thawed in transit). Sources of data: For BMI, 2.3% of values were derived from self-reported height and weight in the 'partial' study protocol and 14.9% of values were derived from measurements taken in the 'self-administered' study protocol. For WC and BP, 15.3% of values were derived from measurements taken in the 'self-administered' protocol.

Information pertaining to relevant health behaviors that may account for the health status of the sample is described in Table 3. With respect to cigarette smoking, 27.5% of participants identified as current or past smokers. The number of current smokers (14.9%) was comparable to national estimates (i.e., 14.1%) among similar-age individuals (25-44 years) as was the pattern of smoking between women and men (13.0% vs. 17.1%, respectively) with men more likely to smoke.<sup>35</sup> Based on 24-hour diet recalls, the Healthy Eating Index (HEI), a marker of diet quality reflecting the degree of alignment with dietary guidelines, was low (mean HEI=50.2) as

compared to an ideal score of 100, indicating complete alignment with dietary guidelines. This value was also lower than national estimates (i.e., 53 between 19-30 years and 58 between 31-59 years), but in line with the poor diets of Americans in general.<sup>29</sup> In parallel, intake of fruits and vegetables was low with only 6.9% and 17.9%, respectively, meeting the daily recommendation for intake in these food groups. This is also in line with the low intake of fruits (i.e., 12.3%) and vegetables (i.e., 10.0%) in the US population.<sup>36</sup> Finally, using actigraphy, patterns of activity and sleep were examined. On average, the time engaged in moderate, vigorous, or very vigorous activity was 1.3 hours/day while sedentary time was 4.5 hours/day with only 15.9% of participants walking 10,000+ steps per day. On average, the participants slept 7.3 hours/night, 38.6% slept less than the recommended 7-9 hours of sleep/night, and 41.0% had sleep efficiency scores <85%, indicating disrupted sleep. Moreover, the global Pittsburgh Sleep Quality Index (PSQI) showed 45.6% had a score of six or greater, reflecting significant sleep problems. In sum, inspection of the health behavior indicators in the sample revealed a general pattern of behaviors related to poor dietary habits, low levels of activity, and disrupted sleep which tracks and may explain the poor health status of the sample on parameters of cardiometabolic risk.

Table 3. Description of health behavior indicators in the full sample and in women and men separately.

|                                     | <b>Total†<br/>(n=705)</b><br>N (%) or mean (SD), range | <b>Women†<br/>(n=378)</b><br>N (%) or mean (SD), range | <b>Men†<br/>(n=327)</b><br>N (%) or mean (SD), range |
|-------------------------------------|--------------------------------------------------------|--------------------------------------------------------|------------------------------------------------------|
| <b>Smoking:</b>                     |                                                        |                                                        |                                                      |
| Current                             | 104 (14.9%)                                            | 49 (13.0%)                                             | 55 (17.1%)                                           |
| Past                                | 88 (12.6%)                                             | 25 (6.6%)                                              | 63 (19.5%)                                           |
| Current/past                        | 192 (27.5%)                                            | 74 (19.6%)                                             | 118 (36.6%)                                          |
| Never                               | 507 (72.5%)                                            | 303 (80.4%)                                            | 204 (63.4%)                                          |
| <b>24-Hour Diet Recall:</b>         |                                                        |                                                        |                                                      |
| Health Eating Index (HEI)           | 50.2 (11.0), 22.4-86.7                                 | 51.3 (10.9), 22.7-86.7                                 | 49.0 (11.0), 22.4-84.3                               |
| Vegetable, cup equivalents          | 1.8 (1.1), 0.0-6.8                                     | 1.8 (1.0), 0.0-6.8                                     | 1.9 (1.1), 0.2-5.7                                   |
| Fruit, cup equivalents              | 0.7 (0.8), 0.0-10.5                                    | 0.7 (0.7), 0.0-4.3                                     | 0.7 (1.0), 0.0-10.5                                  |
| Vegetable, meets daily guideline*   | 119 (17.9%)                                            | 74 (21.0%)                                             | 45 (14.5%)                                           |
| Fruit, meets daily guideline*       | 46 (6.9%)                                              | 24 (6.8%)                                              | 22 (7.1%)                                            |
| <b>Actigraphy, Activity Level:*</b> |                                                        |                                                        |                                                      |
| Very vigorous activity (min/day)    | 2.1 (4.7), 0.0-35.9                                    | 2.0 (4.2), 0.0-33.0                                    | 2.2 (5.2), 0.0-35.9                                  |
| Vigorous activity (min/day)         | 8.9 (16.7), 0.0-177.5                                  | 8.7 (15.9), 0.0-117.0                                  | 9.1 (17.7), 0.0-177.5                                |
| Moderate activity (min/day)         | 65.0 (44.0), 1.8-333.2                                 | 61.5 (42.0), 8.7-308.3                                 | 69.3 (46.0), 1.8-333.2                               |
| Number of steps per day             | 7,368.9 (2,782.8),<br>1,233.9-16,330.6                 | 7,189.7 (2,546.6),<br>1,692.4-16,330.6                 | 7,579.8 (3,028.7),<br>1,233.9-15,656.7               |
| Number of steps 10,000+             | 92 (15.9%)                                             | 38 (12.1%)                                             | 54 (20.3%)                                           |
| Sedentary time (min/day)            | 271.2 (108.6), 23.7-609.3                              | 252.8 (98.5), 31.3-609.3                               | 292.8 (115.9), 23.7-604.5                            |
| <b>Actigraphy, Sleep:*</b>          |                                                        |                                                        |                                                      |
| Sleep efficiency*                   | 85.0 (6.1), 52.8-97.3                                  | 85.2 (5.6), 61.1-97.3                                  | 84.7 (6.7), 52.8-97.1                                |
| Sleep efficiency <85%               | 238 (41.0%)                                            | 123 (38.8%)                                            | 115 (43.6%)                                          |

|                                     |                      |                      |                       |
|-------------------------------------|----------------------|----------------------|-----------------------|
| Total sleep time (hours)            | 7.3 (1.0), 4.0-11.7  | 7.5 (1.0), 4.5-11.7  | 7.0 (1.0), 4.0-10.2   |
| Sleep <7 hours                      | 224 (38.6%)          | 94 (29.7%)           | 130 (49.2%)           |
| Number of awakenings                | 19.8 (7.4), 2.2-48.3 | 19.7 (7.2), 2.2-47.0 | 19.8 (7.7), 3.0-48.3  |
| Average awakening length (min)      | 3.7 (1.4), 1.3-13.4  | 3.7 (1.2), 1.3-8.5   | 3.7 (1.6), 1.6-13.4   |
| Sleep fragmentation*                | 30.1 (8.9), 7.0-69.8 | 29.1 (7.7), 9.8-59.1 | 31.3 (10.1), 7.0-69.8 |
| <b>Self-report, Sleep</b>           |                      |                      |                       |
| PSQI Global Sleep Quality Index     | 5.8 (3.3), 0-18      | 5.9 (3.5), 0-18      | 5.7 (3.1), 0-16       |
| PSQI Global Sleep Quality Index >=6 | 319 (45.6%)          | 180 (47.6%)          | 139 (43.2%)           |

Abbreviations: PSQI=Pittsburgh Sleep Quality Index.

†Missing data: 6 participants did not complete the questionnaire items pertaining to smoking or sleep. 41 participants do not have diet data, 95.1% because they participated in a protocol that did not collect these data and 4.9% for a miscellaneous reason. 124 participants do not have actigraphy data, 31.5% because they participated in a protocol that did not collect these data and 68.5% for a miscellaneous reason (e.g., did not wear monitor for sufficient length of time).

\*Definitions: For vegetables, the daily guideline of 2.5 cups was used for women based on a 2000 calorie diet and the daily guideline of 3.0 cups was used for men based on a 2400 calorie diet. For fruit, the daily guideline of 2.0 cups of fruit was used for both women and men as the recommendation for fruit does not differ between 2000 and 2400 calorie diets. For actigraphy for both activity and sleep indicators, a minimum wear time of 2 days and nights was required. Sleep efficiency is the number of minutes asleep divided by the number of minutes in bed. Sleep fragmentation is an index of restlessness during sleep derived from movement.

In summary, in descriptive analyses, findings to date revealed that the sample was well-educated and growing in their educational attainment as 13.6% were current students. Despite this, the sample showed considerable risk on health status indicators, especially related to obesity, hypertension, and diabetes. Of particular concern, the prevalence of hypertension and pre-diabetes and diabetes exceeded national estimates in similar-age individuals. The examination of health behavior indicators generally tracked with the parameters of poor health status, showing a pattern of poor diet, low activity, and disrupted sleep. The juxtaposition of the sample's relatively young age (26-31 years) and high educational status (55.6% college educated or greater) with its poor health status may suggest a dissociation between health and factors that are typically health protective. This is consistent with observed population health trends, which show a worsening of cardiometabolic health status in younger generations of Americans, especially among Millennials,<sup>37</sup> the generation to which the current sample (born in 1991) belongs.

## STRENGTHS AND LIMITATIONS

A primary strength of the current study, SHINE, was its leveraging of the original NICHD SECCYD to extend and maximize the value of this longitudinal birth cohort. The addition of adulthood measures of health allows innumerable opportunities for the pursuit of life course research relating early life environments to adulthood health and disease risk. Additional strengths include the gold standard methods that were used for the measurement of each health status and health behavior indicator. Extensive recruitment methods were also used to engage participants living in different locations throughout the US and adaptations to the study procedures were developed (e.g., 'self-administered' study protocol) to allow flexibility with participation. Taken

1  
2  
3 together, these approaches balanced the standards of high-quality research with the imperative to reach  
4 participants in distant locations and to reduce barriers to participation, including during the challenging times of  
5 the COVID-19 pandemic.  
6  
7

8           There were also several limitations in the current study. Of the 1364 families that participated in the  
9 original NICHD SECCYD, only 927 (68.0%) adult children were available for inclusion in the current study based  
10 on their prior consent to be re-contacted, as well as five having died. Of this number, 705 (76.1%) participated in  
11 the current study. Analyses showed retention was predicted by higher maternal education at birth ( $b=.152$ ,  
12  $p<.001$ ), but not income-to-needs ratio at birth ( $b=-.007$ ,  $p=.779$ ), with a 16% increase in the odds of retention  
13 among participants with more highly educated mothers. This pattern of greater educational attainment was also  
14 observed among the now adult children and will need to be considered when interpreting future study findings.  
15 Additionally, in the current study, more women than men participated despite efforts to target men specifically.  
16 Finally, the nature of the study required that data collection teams work in the field to implement the study  
17 protocols. In this context, the numerous staff persons, distance from the participants, and varied data collection  
18 environments made oversight by the UW team an on-going challenge. However, as described above, numerous  
19 training and oversight measures were implemented to ensure fidelity to the study protocols. In a related issue,  
20 the data collection for the study occurred between 2018 and 2022, overlapping with the height of the COVID-19  
21 pandemic. In addition to the challenges of conducting in-person research during the pandemic, the pandemic  
22 itself may have had differential impacts on participants who participated during this period and should also be  
23 considered when interpreting future study findings.  
24  
25  
26  
27  
28  
29  
30  
31  
32  
33  
34  
35

### 36 **FUTURE PLANS**

37           The current study lays the groundwork for future analyses relating early life environments to adulthood  
38 health and disease risk. Within this broad framework, two specific areas of inquiry will be pursued initially. First,  
39 building on a large literature describing the graded relationship between socioeconomic status and health,<sup>38-41</sup>  
40 an in-depth examination is planned to delineate the specific features of educational attainment that are health  
41 protective. This objective stems from an NIH initiative to support research that ‘further elucidates the pathways  
42 involved in the relationship between education and health outcomes and to identify the specific aspects and  
43 qualities of education that are responsible for this relationship’.<sup>42</sup> The current study is well positioned to  
44 contribute to this area by testing links between key aspects of education in early life, such as childhood  
45 academic skills and classroom experiences, and childhood health concurrently as well as adulthood health  
46 prospectively. In addition, this work will consider the potential moderating role of education in offsetting early  
47  
48  
49  
50  
51  
52  
53  
54  
55  
56  
57  
58  
59  
60



1  
2  
3 childhood adversity experiences as well as other contributing factors such as high-quality childcare, parental  
4 education, and child intelligence and temperament.  
5  
6  
7

8 Second, building on a large literature describing associations between early life adversity exposures and  
9 poor health,<sup>4-9</sup> an in-depth examination is planned that focuses on the potential mediating role of growth and  
10 pubertal development trajectories in accounting for early life adversity effects on adulthood cardiometabolic  
11 health.<sup>43-45</sup> This objective also stems from an NIH initiative to support research that identifies specific  
12 vulnerability factors and mechanisms by which early life adversity exposures transmit risk for poor health.<sup>46</sup> The  
13 current study is well positioned to contribute to this area by testing empirically the mechanistic role of pubertal  
14 development in a single longitudinal data set, thereby integrating previously separate literatures 1) relating early  
15 life adversity to earlier and faster rates of pubertal maturation<sup>47-51</sup> and 2) relating earlier pubertal maturation to  
16 poor cardiometabolic outcomes.<sup>52-57</sup> This work will also consider concurrent trajectories of prepubertal weight  
17 gain, relevant health behaviors, and resilience factors. For both main areas of inquiry, the many strengths of the  
18 original NICHD SECCYD and recent SHINE data collection will allow testing of these life course models with  
19 adequate accounting of covariates and alternative explanatory factors and will overcome common challenges  
20 present in these literatures, including long latency periods between the exposures and outcomes of interest as  
21 well as poor integration of relevant developmental and epidemiologic approaches.  
22  
23  
24  
25  
26  
27  
28  
29  
30  
31  
32

### 33 **COLLABORATION**

34  
35 Data and materials from the NICHD SECCYD are available online: [icpsr.umich.edu/web/ICPSR/series/233](http://icpsr.umich.edu/web/ICPSR/series/233).  
36  
37 Researchers interested in working with the team of investigators who led the SHINE follow-up data collection  
38 are invited to contact MEB and GIR. Potential collaborative efforts will be considered under specific conditions,  
39 including, but not limited to, the proposed scope of work and assurances related to data security and integrity.  
40  
41  
42

### 43 **CONCLUSIONS**

44  
45 The landmark NICHD SECCYD, as described above, is a unique resource that has supported research in  
46 diverse areas of child health and well-being since its inception in 1991. With the addition of the follow-up data  
47 collection—SHINE, through which the health status of the now adult participants has been characterized, new  
48 opportunities to test life course models linking early life environments to adulthood health and disease risk have  
49 emerged. These opportunities are timely given the wealth of evidence suggesting the origins of adulthood  
50 health begin in childhood as well as the growing imperative to move toward prevention focused efforts to  
51 reverse worsening US population health trends. The initial examination of these newly available data reveals a  
52  
53  
54  
55  
56  
57  
58  
59  
60

1  
2  
3 distinct pattern of poor health, especially relating to obesity, hypertension, and diabetes. This pattern was  
4 observed despite the relatively young age and high educational status of the sample but is consistent with  
5 findings suggesting the health of younger generations of Americans is worsening, as evidenced by comparisons  
6 to the health of their same-age counterparts from older generations. With the adulthood health measures now  
7 in place, the next steps for this work will entail leveraging the uniquely robust measures collected as a part of  
8 the original NICHD SECCYD to pinpoint specific early life risk and resilience factors as well as the correlates and  
9 potential mechanisms accounting for variability in trajectories of health and disease risk in the period of young  
10 adulthood. In addition, the work of the current study is discussed with an emphasis on lessons that were learned  
11 conducting in-person, health focused research among participants living in distant locations throughout the US  
12 and in a period overlapping with the COVID-19 pandemic.  
13  
14  
15  
16  
17  
18  
19  
20  
21  
22  
23  
24  
25  
26  
27  
28  
29  
30  
31  
32  
33  
34  
35  
36  
37  
38  
39  
40  
41  
42  
43  
44  
45  
46  
47  
48  
49  
50  
51  
52  
53  
54  
55  
56  
57  
58  
59  
60

1  
2  
3 **Contributors:** MEB led the conceptualization and writing of this manuscript with assistance with data cleaning  
4 and analysis from AST and WSY. MEB, GIR, SEG, BMA, RAH, RCP, ALM, GMS, AST, WSY, CBL participated in the  
5 execution of the SHINE data collection and all authors collaborated on the conceptualization, writing, and critical  
6 review of this manuscript.  
7

8  
9 **Funding:** This work was supported by the *Eunice Kennedy Shriver* National Institute of Child Health and Human  
10 Development (U10HD025447, R01HD091132) and the National Heart, Lung, and Blood Institute (R01HL130103)  
11 at the National Institutes of Health.  
12

13 **Competing Interests:** None declared.  
14  
15

## 16 REFERENCES

- 17 1. NICHD Early Child Care Research Network. Child care and child development: Results from the NICHD study  
18 of early child care and youth development: Guilford Press; 2005.
- 19 2. Dagan O, Buisman RSM, Nivison MD, et al. Does secure base script knowledge mediate associations  
20 between observed parental caregiving during childhood and adult romantic relationship quality and  
21 health? *Attach Hum Dev.* 2021;23(5):643-64.
- 22 3. Kunkel J, Magro SW, Bleil ME, et al. Early maternal sensitivity and markers of physical health: Enduring or  
23 transient associations from childhood to adulthood? *Dev Psychol.* in press.
- 24 4. Suglia SF, Koenen KC, Boynton-Jarrett R, et al. Childhood and adolescent adversity and cardiometabolic  
25 outcomes: A Scientific Statement from the American Heart Association. *Circulation.* 2018;137(5):e15-e28.
- 26 5. Suglia SF, Brown AGM, Campo RA, et al. Social determinants of cardiovascular health: Early life adversity as  
27 a contributor to disparities in cardiovascular diseases. *The Journal of Pediatrics.* 2020.
- 28 6. Suglia SF, Appleton AA, Bleil ME, et al. Timing, duration, and differential susceptibility to early life  
29 adversities and cardiovascular disease risk across the lifespan: Implications for future research. *Prev Med.*  
30 2021;153:106736.
- 31 7. Berens AE, Jensen SKG, Nelson CA. Biological embedding of childhood adversity: From physiological  
32 mechanisms to clinical implications. *BMC Med.* 2017;15(1):135.
- 33 8. Shonkoff JP, Garner AS. The lifelong effects of early childhood adversity and toxic stress. *Pediatrics.*  
34 2012;129(1):e232-46.
- 35 9. Su S, Jimenez MP, Roberts CT, et al. The role of adverse childhood experiences in cardiovascular disease  
36 risk: A review with emphasis on plausible mechanisms. *Curr Cardiol Rep.* 2015;17(10):88.
- 37 10. Galobardes B, Lynch JW, Smith GD. Childhood socioeconomic circumstances and cause-specific mortality in  
38 adulthood: Systematic review and interpretation. *Epidemiologic Reviews.* 2004;26:7-21.  
39  
40  
41  
42  
43  
44  
45  
46  
47  
48  
49  
50  
51  
52  
53  
54  
55  
56  
57  
58  
59  
60

11. Galobardes B, Lynch JW, Smith GD. Is the association between childhood socioeconomic circumstances and cause-specific mortality established? Update of a systematic review. *J Epidemiol Community Health*. 2008;62(5):387-90.
12. Galobardes B, Smith GD, Lynch JW. Systematic review of the influence of childhood socioeconomic circumstances on risk for cardiovascular disease in adulthood. *Ann Epidemiol*. 2006;16(2):91-104.
13. Midei AJ, Matthews KA. Interpersonal violence in childhood as a risk factor for obesity: a systematic review of the literature and proposed pathways. *Obesity Reviews*. 2011;12(501):e159-e72.
14. Midei AJ, Matthews KA, Chang YF, et al. Childhood physical abuse is associated with incident metabolic syndrome in mid-life women. *Health Psychology*. 2013;32(2):121-7.
15. Wegman HL, Stetler C. A meta-analytic review of the effects of childhood abuse on medical outcomes in adulthood. *Psychosomatic Medicine*. 2009;71(8):805-12.
16. Johnson WF, Huelsnitz CO, Carlson EA, et al. Childhood abuse and neglect and physical health at midlife: Prospective, longitudinal evidence. *Dev Psychopathol*. 2017;29(5):1935-46.
17. Farrell AK, Waters TEA, Young ES, et al. Early maternal sensitivity, attachment security in young adulthood, and cardiometabolic risk at midlife. *Attach Hum Dev*. 2019;21(1):70-86.
18. Young ES, Farrell AK, Carlson EA, et al. The dual impact of early and concurrent life stress on adults' diurnal cortisol patterns: A prospective study. *Psychological Science*. 2019;30(5):739-47.
19. Young ES, Doom JR, Farrell AK, et al. Life stress and cortisol reactivity: An exploratory analysis of the effects of stress exposure across life on HPA-axis functioning. *Dev Psychopathol*. 2021;33(1):301-12.
20. Anderson GF, Hurst J, Hussey PS, et al. Health spending and outcomes: Trends in OECD countries, 1960-1998. *Health Aff*. 2000;19(3):150-7.
21. Anderson GF, Reinhardt UE, Hussey PS, et al. It's the prices, stupid: Why the United States is so different from other countries. *Health Aff*. 2003;22(3):89-105.
22. Papanicolas I, Woskie LR, Jha AK. Health care spending in the United States and other high-income countries. *Jama-Journal of the American Medical Association*. 2018;319(10):1024-39.
23. Carey VJ, Walters EE, Colditz GA, et al. Body fat distribution and risk of non-insulin-dependent diabetes mellitus in women - The Nurses' Health Study. *American Journal of Epidemiology*. 1997;145(7):614-9.
24. Janssen I, Katzmarzyk PT, Ross R. Body mass index, waist circumference, and health risk. *Archives of Internal Medicine*. 2002;162(18):2074-9.
25. Lapidus L, Bengtsson C, Larsson B, et al. Distribution of adipose tissue and risk of cardiovascular disease and death: A 12-year follow-up of participants in the Population Study of Women in Gothenburg, Sweden. *Br Med J*. 1984;289(6454):1257-61.

- 1
- 2
- 3 26. Dieleman JL, Baral R, Birger M, et al. US spending on personal health care and public health, 1996-2013.
- 4 Jama-Journal of the American Medical Association. 2016;316(24):2627-46.
- 5
- 6 27. Martin AB, Hartman M, Washington B, et al. National health spending: Faster growth in 2015 as coverage
- 7 expands and utilization increases. *Health Aff (Millwood)*. 2017;36(1):166-76.
- 8
- 9 28. National Cancer Institute, Division of Cancer Control & Population Sciences, Automated Self-Administered
- 10 24-Hour (ASA24) Dietary Assessment Tool. Available: <https://epi.grants.cancer.gov/asa24> [Accessed July
- 11 2022].
- 12
- 13 29. US Department of Agriculture, Food and Nutrition Service, Healthy Eating Index. Available:
- 14 <https://www.fns.usda.gov/healthy-eating-index-hei> [Accessed July 2022].
- 15
- 16 30. U.S. Census Bureau. Educational Attainment in the United States: 2019. Table 3. Detailed Years of School
- 17 Completed by People 25 Years and Over by Sex, Age Groups, Race and Hispanic Origin: 2019. Available:
- 18 [https://www.census.gov/content/census/en/data/tables/2019/demo/educational-attainment/cps-](https://www.census.gov/content/census/en/data/tables/2019/demo/educational-attainment/cps-detailed-tables.html)
- 19 [detailed-tables.html](https://www.census.gov/content/census/en/data/tables/2019/demo/educational-attainment/cps-detailed-tables.html) [Accessed July 2022].
- 20
- 21 31. National Center for Health Statistics, National Health Interview Survey, Prevalence of obesity among adults
- 22 aged 20 and over, by age group and sex: United States, 2018. Available:
- 23 [https://public.tableau.com/app/profile/nhis/viz/FIGURE6\\_2/Dashboard6\\_2](https://public.tableau.com/app/profile/nhis/viz/FIGURE6_2/Dashboard6_2) [Accessed July 2022].
- 24
- 25 32. National Health and Nutrition Examination Survey 2017–March 2020 Prepandemic Data Files Development
- 26 of Files and Prevalence Estimates for Selected Health Outcomes, (2021).
- 27
- 28 33. National Center for Health Statistics, National Health and Nutrition Examination Survey, 2017-2018,
- 29 Available: [https://www.cdc.gov/nchs/about/factsheets/factsheet\\_nhanes.htm](https://www.cdc.gov/nchs/about/factsheets/factsheet_nhanes.htm) [Accessed July 2022].
- 30
- 31 34. Centers for Disease Control and Prevention. National Diabetes Statistics Report, 2020. Atlanta, GA,
- 32 Available: <https://www.cdc.gov/diabetes/pdfs/data/statistics/national-diabetes-statistics-report.pdf>
- 33 [Accessed July 2022].
- 34
- 35 35. Cornelius ME, Loretan CG, Wang TW, et al. Tobacco product use among adults - United States, 2020.
- 36 *MMWR Morb Mortal Wkly Rep*. 2022;71(11):397-405.
- 37
- 38 36. Lee SH, Moore LV, Park S, et al. Adults meeting fruit and vegetable intake recommendations - United
- 39 States, 2019. *MMWR Morb Mortal Wkly Rep*. 2022;71(1):1-9.
- 40
- 41 37. BlueCross BlueShield The Health Of America, The Health of Millennials, April 24, 2019, A Focus on
- 42 Millennial Health Trends. Available: [https://www.bcbs.com/sites/default/files/file-attachments/health-of-](https://www.bcbs.com/sites/default/files/file-attachments/health-of-america-report/HOA-Millennial_Health_0.pdf)
- 43 [america-report/HOA-Millennial\\_Health\\_0.pdf](https://www.bcbs.com/sites/default/files/file-attachments/health-of-america-report/HOA-Millennial_Health_0.pdf) [Accessed July 2022].
- 44
- 45 38. Adler NE, Boyce T, Chesney MA, et al. Socioeconomic status and health. The challenge of the gradient. *Am*
- 46 *Psychol*. 1994;49(1):15-24.
- 47
- 48
- 49
- 50
- 51
- 52
- 53
- 54
- 55
- 56
- 57
- 58
- 59
- 60

- 1
  - 2
  - 3
  - 4
  - 5
  - 6
  - 7
  - 8
  - 9
  - 10
  - 11
  - 12
  - 13
  - 14
  - 15
  - 16
  - 17
  - 18
  - 19
  - 20
  - 21
  - 22
  - 23
  - 24
  - 25
  - 26
  - 27
  - 28
  - 29
  - 30
  - 31
  - 32
  - 33
  - 34
  - 35
  - 36
  - 37
  - 38
  - 39
  - 40
  - 41
  - 42
  - 43
  - 44
  - 45
  - 46
  - 47
  - 48
  - 49
  - 50
  - 51
  - 52
  - 53
  - 54
  - 55
  - 56
  - 57
  - 58
  - 59
  - 60
39. Adler NE, Snibbe AC. The role of psychosocial processes in explaining the gradient between socioeconomic status and health. *Current Directions in Psychological Science*. 2003;12(4):119-23.
40. Marmot MG, Smith GD, Stansfeld S, et al. Health inequalities among British civil servants: the Whitehall II study. *Lancet*. 1991;337(8754):1387-93.
41. Marmot M. Social determinants of health inequalities. *Lancet*. 2005;365(9464):1099-104.
42. National Institutes of Health (NIH), Pathways Linking Education to Health. Available: <https://grants.nih.gov/grants/guide/rfa-files/RFA-OB-03-001.html> [Accessed July 2022].
43. Bleil ME, Appelhans BM, Gregorich SE, et al. Patterns of early life weight gain and female onset of puberty. *J Endocr Soc*. 2021;5(12):bvab165.
44. Bleil ME, Spieker SJ, Gregorich SE, et al. Early life adversity and pubertal timing: Implications for cardiometabolic health. *J Pediatr Psychol*. 2021;46(1):36-48.
45. Bleil ME, Adler NE, Appelhans BM, et al. Childhood adversity and pubertal timing: Understanding the origins of adulthood cardiovascular risk. *Biol Psychol*. 2013;93(1):213-9.
46. National Institutes of Health (NIH), Pathways and Mechanisms Linking Early Life Adversities (ELAs) and Adulthood Health Outcomes. Available: <https://www.nia.nih.gov/research/dbsr/pathways-and-mechanisms-linking-early-life-adversities-elas-and-adult-health-outcomes> [Accessed July 2022].
47. Hamlat EJ, Laraia B, Bleil ME, et al. Effects of early life adversity on pubertal timing and tempo in black and white girls: The National Growth and Health Study. *Psychosom Med*. 2022;84(3):297-305.
48. Belsky J, Houts RM, Fearon RMP. Infant attachment security and the timing of puberty: Testing an evolutionary hypothesis. *Psychological Science*. 2010;21(9):1195-201.
49. Belsky J, Steinberg LD, Houts RM, et al. Family rearing antecedents of pubertal timing. *Child Development*. 2007;78(4):1302-21.
50. Deardorff J, Abrams B, Ekwaru JP, et al. Socioeconomic status and age at menarche: an examination of multiple indicators in an ethnically diverse cohort. *Ann Epidemiol*. 2014;24(10):727-33.
51. Hiatt RA, Stewart SL, Hoefft KS, et al. Childhood socioeconomic position and pubertal onset in a cohort of multiethnic girls: Implications for breast cancer. *Cancer Epidemiology Biomarkers & Prevention*. 2017;26(12):1714-21.
52. Frontini MG, Srinivasan SR, Berenson GS. Longitudinal changes in risk variables underlying metabolic syndrome X from childhood to young adulthood in female subjects with a history of early menarche: The Bogalusa Heart Study. *International Journal of Obesity*. 2003;27(11):1398-404.
53. He CY, Zhang CL, Hunter DJ, et al. Age at menarche and risk of type 2 diabetes: Results from 2 large prospective cohort studies. *American Journal of Epidemiology*. 2010;171(3):334-44.

- 1  
2  
3 54. Remsberg KE, Demerath EW, Schubert CM, et al. Early menarche and the development of cardiovascular  
4 disease risk factors in adolescent girls: The Fels Longitudinal Study. *Journal of Clinical Endocrinology &*  
5 *Metabolism*. 2005;90(5):2718-24.  
6  
7  
8 55. Jacobsen BK, Heuch I, Kvale G. Association of low age at menarche with increased all-cause mortality: A 37-  
9 year follow-up of 61,319 Norwegian women. *American Journal of Epidemiology*. 2007;166(12):1431-7.  
10  
11 56. Jacobsen BK, Oda K, Knutsen SF, et al. Age at menarche, total mortality and mortality from ischaemic heart  
12 disease and stroke: The Adventist Health Study, 1976-88. *International Journal of Epidemiology*.  
13 2009;38(1):245-52.  
14  
15  
16 57. Widen E, Silventoinen K, Sovio U, et al. Pubertal timing and growth influences cardiometabolic risk factors  
17 in adult males and females. *Diabetes Care*. 2012;35(4):850-6.  
18  
19  
20  
21  
22  
23  
24  
25  
26  
27  
28  
29  
30  
31  
32  
33  
34  
35  
36  
37  
38  
39  
40  
41  
42  
43  
44  
45  
46  
47  
48  
49  
50  
51  
52  
53  
54  
55  
56  
57  
58  
59  
60

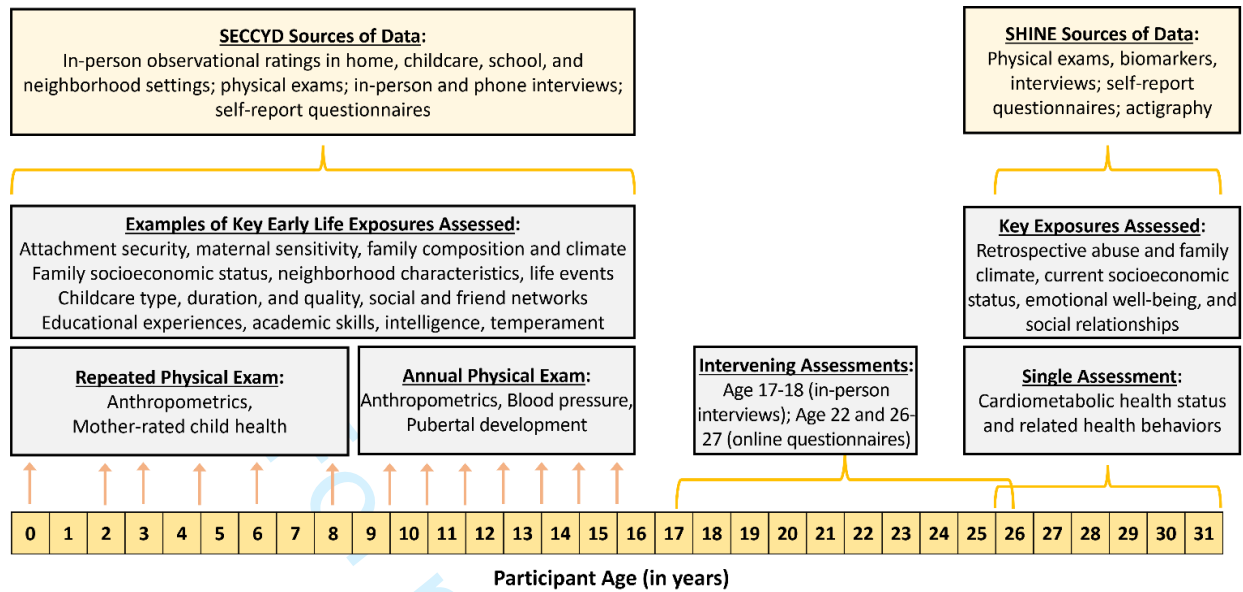

Figure 1. Description of the data collections in the SECCYD (repeated assessments between birth and age 15.5) and SHINE (single assessment in young adulthood), as well as single follow-up assessments at ages 17-18, 22, and 26-27 years.



# BMJ Open

## Cohort Profile: A 30-Year Follow-up of the NICHD Study of Early Child Care and Youth Development (SECCYD), the Challenges and Triumphs of Conducting In-Person Research at a Distance

|                                 |                                                                                                                                                                                                                                                                                                                                                                                                                                                                                                                                                                                                                                                                                                                                                                                                                                                                                                                                                                                                                                                                              |
|---------------------------------|------------------------------------------------------------------------------------------------------------------------------------------------------------------------------------------------------------------------------------------------------------------------------------------------------------------------------------------------------------------------------------------------------------------------------------------------------------------------------------------------------------------------------------------------------------------------------------------------------------------------------------------------------------------------------------------------------------------------------------------------------------------------------------------------------------------------------------------------------------------------------------------------------------------------------------------------------------------------------------------------------------------------------------------------------------------------------|
| Journal:                        | <i>BMJ Open</i>                                                                                                                                                                                                                                                                                                                                                                                                                                                                                                                                                                                                                                                                                                                                                                                                                                                                                                                                                                                                                                                              |
| Manuscript ID                   | bmjopen-2022-066655.R1                                                                                                                                                                                                                                                                                                                                                                                                                                                                                                                                                                                                                                                                                                                                                                                                                                                                                                                                                                                                                                                       |
| Article Type:                   | Cohort profile                                                                                                                                                                                                                                                                                                                                                                                                                                                                                                                                                                                                                                                                                                                                                                                                                                                                                                                                                                                                                                                               |
| Date Submitted by the Author:   | 22-Dec-2022                                                                                                                                                                                                                                                                                                                                                                                                                                                                                                                                                                                                                                                                                                                                                                                                                                                                                                                                                                                                                                                                  |
| Complete List of Authors:       | Bleil, Maria E; University of Washington, Department of Child, Family, & Population Health Nursing<br>Roisman, Glenn; University of Minnesota Twin Cities, Institute of Child Development<br>Gregorich, Steven; University of California San Francisco, School of Medicine<br>Appelhans, Bradley; Rush University Medical Center, Department of Preventive Medicine<br>Hiatt, Robert; University of California San Francisco, Department of Epidemiology and Biostatistics<br>Pianta, Robert; University of Virginia, School of Education and Human Development<br>Marsland, Anna; University of Pittsburgh, Department of Psychology<br>Slavich, George; University of California Los Angeles, Department of Psychiatry and Biobehavioral Sciences<br>Thomas, Alexis; University of Washington, Department of Child, Family, & Population Health Nursing<br>Yeung, Winnie; University of Washington, Department of Child, Family, & Population Health Nursing<br>Booth-LaForce, Cathryn; University of Washington, Department of Child, Family, & Population Health Nursing |
| <b>Primary Subject Heading</b>: | Epidemiology                                                                                                                                                                                                                                                                                                                                                                                                                                                                                                                                                                                                                                                                                                                                                                                                                                                                                                                                                                                                                                                                 |
| Secondary Subject Heading:      | Cardiovascular medicine, Diabetes and endocrinology, Public health, Research methods, Nutrition and metabolism                                                                                                                                                                                                                                                                                                                                                                                                                                                                                                                                                                                                                                                                                                                                                                                                                                                                                                                                                               |
| Keywords:                       | EPIDEMIOLOGY, MENTAL HEALTH, PREVENTIVE MEDICINE, PUBLIC HEALTH, SOCIAL MEDICINE, CARDIOLOGY                                                                                                                                                                                                                                                                                                                                                                                                                                                                                                                                                                                                                                                                                                                                                                                                                                                                                                                                                                                 |
|                                 |                                                                                                                                                                                                                                                                                                                                                                                                                                                                                                                                                                                                                                                                                                                                                                                                                                                                                                                                                                                                                                                                              |

SCHOLARONE™  
Manuscripts

1  
2  
3  
4  
5  
6  
7  
8  
9  
10  
11  
12  
13  
14  
15  
16  
17  
18  
19  
20  
21  
22  
23  
24  
25  
26  
27  
28  
29  
30  
31  
32  
33  
34  
35  
36  
37  
38  
39  
40  
41  
42  
43  
44  
45  
46  
47  
48  
49  
50  
51  
52  
53  
54  
55  
56  
57  
58  
59  
60



I, the Submitting Author has the right to grant and does grant on behalf of all authors of the Work (as defined in the below author licence), an exclusive licence and/or a non-exclusive licence for contributions from authors who are: i) UK Crown employees; ii) where BMJ has agreed a CC-BY licence shall apply, and/or iii) in accordance with the terms applicable for US Federal Government officers or employees acting as part of their official duties; on a worldwide, perpetual, irrevocable, royalty-free basis to BMJ Publishing Group Ltd ("BMJ") its licensees and where the relevant Journal is co-owned by BMJ to the co-owners of the Journal, to publish the Work in this journal and any other BMJ products and to exploit all rights, as set out in our [licence](#).

The Submitting Author accepts and understands that any supply made under these terms is made by BMJ to the Submitting Author unless you are acting as an employee on behalf of your employer or a postgraduate student of an affiliated institution which is paying any applicable article publishing charge ("APC") for Open Access articles. Where the Submitting Author wishes to make the Work available on an Open Access basis (and intends to pay the relevant APC), the terms of reuse of such Open Access shall be governed by a Creative Commons licence – details of these licences and which [Creative Commons](#) licence will apply to this Work are set out in our licence referred to above.

Other than as permitted in any relevant BMJ Author's Self Archiving Policies, I confirm this Work has not been accepted for publication elsewhere, is not being considered for publication elsewhere and does not duplicate material already published. I confirm all authors consent to publication of this Work and authorise the granting of this licence.

1  
2  
3 **Cohort Profile: A 30-Year Follow-up of the NICHD Study of Early Child Care and Youth Development (SECCYD),**  
4 **the Challenges and Triumphs of Conducting In-Person Research at a Distance**  
5  
6  
7

8 Maria E. Bleil, PhD<sup>1\*</sup>; Glenn I. Roisman, PhD<sup>2</sup>; Steven E. Gregorich, PhD<sup>3</sup>; Bradley M. Appelhans, PhD<sup>4</sup>; Robert A.  
9 Hiatt, MD, PhD<sup>5</sup>; Robert C. Pianta, PhD<sup>6</sup>; Anna L. Marsland, PhD<sup>7</sup>; George M. Slavich, PhD<sup>8</sup>; Alexis S. Thomas,  
10 MPH<sup>1</sup>; Winnie S. Yeung, BA<sup>1</sup>; and Cathryn Booth-LaForce, PhD<sup>1</sup>  
11  
12

13 <sup>1</sup>Child, Family, and Population Health Nursing, University of Washington, Seattle, WA, USA

14 <sup>2</sup>Institute of Child Development, University of Minnesota, Minneapolis, MN, USA

15 <sup>3</sup>Department of Medicine, University of California San Francisco, San Francisco, CA, USA

16 <sup>4</sup>Department of Preventive Medicine, Rush University Medical Center, Chicago, IL, USA

17 <sup>5</sup>Department of Epidemiology and Biostatistics, University of California San Francisco, San Francisco, CA, USA

18 <sup>6</sup>School of Education and Human Development, University of Virginia, Charlottesville, VA, USA

19 <sup>7</sup>Department of Psychology, University of Pittsburgh, Pittsburgh, PA, USA

20 <sup>8</sup>Department of Psychiatry and Biobehavioral Sciences, University of California Los Angeles, Los Angeles, CA, USA  
21  
22  
23

24 **\*Corresponding Author:** Maria E. Bleil, PhD, Department of Child, Family, and Population Health Nursing,  
25 University of Washington, Box 357262, Seattle, WA 98195, USA.

26 Email: [mbleil@uw.edu](mailto:mbleil@uw.edu)  
27  
28

29 Abstract word count: 300

30 Number of references: 77

31 Word count: 7373  
32

33 **ORCID IDs:**

34 **Maria Bleil**, <https://orcid.org/0000-0002-2006-4533>  
35  
36  
37  
38  
39  
40  
41  
42  
43  
44  
45  
46  
47  
48  
49  
50  
51  
52  
53  
54  
55  
56  
57  
58  
59  
60

## ABSTRACT

### Purpose

The purpose of the current study, The National Institute of Child Health and Human Development (NICHD) Study of Health in Early and Adult Life (SHINE), was to build on the landmark Study of Early Child Care and Youth Development (SECCYD), a longitudinal birth cohort initiated in 1991, by conducting a health-focused follow-up of the now adult participants. This effort has produced an invaluable resource for the pursuit of life course research examining links between early life risk and resilience factors and adulthood health and disease risk.

### Participants

Of the 927 NICHD SECCYD participants available for recruitment in the current study, 705 (76.1%) participated. Participants were between 26-31 years and living in diverse geographic locations throughout the United States (US).

### Findings to date

In descriptive analyses, the sample exhibited risk on health status indicators, especially related to obesity, hypertension, and diabetes. Of particular concern, the prevalence of hypertension (29.4%) and diabetes (25.8%) exceeded national estimates in similar-age individuals. Health behavior indicators generally tracked with the parameters of poor health status, showing a pattern of poor diet, low activity, and disrupted sleep. The juxtaposition of the sample's relatively young age (M=28.6 years) and high educational status (55.6% college+) with its poor health status is noteworthy, suggesting a dissociation between health and factors that are typically health protective. This is consistent with observed population health trends which show a worsening of cardiometabolic health status in younger generations of Americans.

### Future plans

The current study, SHINE, lays the groundwork for future analyses in which the uniquely robust measures collected as a part of the original NICHD SECCYD will be leveraged to pinpoint specific early life risk and resilience factors as well as the correlates and potential mechanisms accounting for variability in health and disease risk indicators in the period of young adulthood.

### Strengths and limitations of this study

- The current study, SHINE, leveraged the original NICHD SECCYD to extend and maximize the value of this longitudinal birth cohort by collecting adulthood measures of health, thereby, creating an invaluable resource for the pursuit of life course research relating early life exposures to adulthood health and disease risk.
- Gold standard methods were used for the measurement of each health status and health behavior indicator.
- Extensive recruitment methods were used to engage participants living in different locations throughout the US and adaptations to the study procedures were developed (e.g., 'self-administered' study protocol) to allow flexibility with participation, especially needed through the COVID-19 pandemic.
- The nature of the data collection required that data collection teams work in the field to implement the study protocols, thus, resulting in many challenges, including the management of numerous staff persons, physical distance from the participants, and varied data collection environments.

## INTRODUCTION

The National Institute of Child Health and Human Development (NICHD) Study of Early Child Care and Youth Development (SECCYD) is a landmark study of child development conducted in the United States (US) between 1991 and 2009.[1] It was initiated by NICHD to characterize impacts of early childcare environments on domains of child social, emotional, and cognitive development as well as aspects of physical development and health. Families were enrolled at the child's birth from diverse geographic locations and followed annually over the course of the study. The breadth and depth of measurement available in the NICHD SECCYD has made it a unique resource for developmental scientists, supporting a wealth of discovery in broad areas of child health and well-being. To date, well over one thousand scientific research articles have been published leveraging these data (e.g.,[1-6]) with additional efforts employed to follow the members of this longitudinal birth cohort who are now in young adulthood.

The value of the NICHD SECCYD continues to grow over time, most especially in its potential to inform timely research questions relating early life environments to adulthood health and disease risk.[7, 8] Burgeoning areas of research suggest the origins of adulthood health and disease are rooted in early life environments.[9-14] In these studies, markers indexing childhood exposures such as maladaptive family interactions (e.g., abuse) and lower socioeconomic status (e.g., low parental education) have been identified as early life risk factors for long-term disease and mortality outcomes, as well as intermediate health conditions (e.g., obesity).[15-20] The epidemiological studies reporting these associations, however, typically lack the depth of measurement present in a study such as the NICHD SECCYD, precluding opportunities to pinpoint the processes and mechanisms underlying these effects, but see studies.[21-24] As examples, areas of measurement uniquely available in the NICHD SECCYD include repeated, multi-method assessments of attachment security, parenting sensitivity, childcare quality, and nuances of early educational environments as well as child-level assessments of intelligence, temperament, and social relationships. Moreover, a focus on upstream factors relevant to later life health is a growing imperative as traditional disease-focused approaches targeting the remediation of poor health in adulthood are simply not working. The US, compared to other high-income countries, ranks the lowest in life expectancy, the highest in infant mortality, and has the highest percentage of adults who are overweight or obese,[25-27] itself a significant predictor of morbidity and mortality.[28-30] All the while, spending on healthcare exceeds \$3 trillion US Dollar (USD) per year.[31, 32] These worsening trends underscore the profound need to move away from conventional strategies for intervention to instead consider how early life risk and resilience factors may be leveraged in the context of primary prevention efforts.

1  
2  
3 The objective of the current study was to actualize the potential of the NICHD SECCYD by conducting a  
4 follow-up assessment of the now adult participants (ages 26-31 years). This follow-up, re-branded The Study of  
5 Health in Early and Adult Life (SHINE) focused on the collection of detailed health information, using gold  
6 standard methods for the assessment of blood pressure and anthropometrics, the ascertainment of blood and  
7 hair samples, the implementation of 24-hour diet recall interviews and 7-day actigraphy for activity/sleep  
8 monitoring, and the completion of comprehensive self-report questionnaires in multiple areas of health and  
9 well-being. The availability of these measures will make possible the pursuit of prospective research questions  
10 linking the wealth of existing data characterizing the early life environments of the participants as children and  
11 adolescents with the newly collected data characterizing the health status of the participants now as adults.  
12 Here, in the current report, we present results describing these adulthood health measures and outline our  
13 analytical plans to test a series of life course models integrating the NICHD SECCYD and SHINE data. Additionally,  
14 we also discuss our unique experiences and lessons learned during the SHINE data collection in which we faced  
15 many challenges conducting in-person health assessments among participants living in distant locations  
16 throughout the US and in a period overlapping with the COVID-19 pandemic.  
17  
18  
19  
20  
21  
22  
23  
24  
25  
26  
27

## 28 **COHORT DESCRIPTION**

### 31 **Sample overview:**

32  
33 Participants in the current study were originally recruited at birth as a part of the NICHD SECCYD, a  
34 prospective study of children and their families followed between birth and adolescence to examine trajectories  
35 of child health and development.[1] Families were from 10 geographically diverse study sites in the US: Seattle,  
36 WA; Madison, WI; Irvine, CA; Pittsburgh, PA; Wellesley, MA; Little Rock, AR; Philadelphia, PA; Morganton, NC;  
37 Lawrence, KS; and Charlottesville, VA. In the first 11 months of 1991, all mother-infant dyads of babies born  
38 within preselected 24-hour intervals at participating hospitals were screened. Exclusion criteria were mother  
39 <18 years old, non-English speaking, or had a substance use disorder; serious medical problems (mother or  
40 infant); lived >1 hour from the study site; child being placed for adoption; concurrent participation in another  
41 study; and refusal to participate in initial screening. Additional sampling requirements were imposed (e.g., 10%  
42 recruitment of single parent households) to ensure that the sociodemographic composition of the final sample  
43 (N=1364 families; n=659 girls [48.3%] and n=705 boys [51.7%]) was proportionate to the population of the  
44 geographies from which they were recruited, according to the 1990 US Census.  
45  
46  
47  
48  
49  
50  
51  
52  
53  
54  
55  
56  
57  
58  
59  
60



1  
2  
3 Following completion of the final data collection time point in the original NICHD SECCYD at age 15  
4 years, 946 adolescent participants and their parents agreed to be re-contacted for future research studies.  
5 Additional research contacts occurred at participant ages 17-18 years,[33] age 22 years,[34] and ages 26-27  
6 years,[35, 36] after which time 930 young adults remained in the sample. This reduction in sample size was due  
7 to 14 participants who rescinded their consent for future contact and 2 participants who died. Among these 930  
8 participants, 3 additional participants died subsequently, leaving 927 participants available for recruitment in  
9 the current study. All participant deaths were confirmed by death records, obituaries, or verbal confirmation by  
10 parents.  
11  
12  
13  
14  
15  
16  
17

18 The current study, a follow-up to the NICHD SECCYD re-branded SHINE, located these now young adults  
19 (n=927, ages 26-31) to complete an in-person study visit. The SHINE data collection occurred between 2018-  
20 2022. Extensive social, behavioral, and health data were collected with the goal of testing effects of early life  
21 exposures, and the mechanisms of these effects, on trajectories of health and disease risk over time. The current  
22 study is the first among the existing NICHD SECCYD data collection efforts to engage the participants as adults  
23 (age  $\geq 18$  years) with an in-depth, in-person protocol focused on the assessment of cardiometabolic health  
24 specifically. The current study is also unique in its design and methodological approach as it was led by a single  
25 research team at the University of Washington (UW) who oversaw the in-person data collection at numerous  
26 locations throughout the US. To execute the study from a distance, and during the COVID-19 pandemic, many  
27 useful adaptations were developed, some originating from experiences of failure that are shared here as lessons  
28 to other investigators interested in conducting similar work (see details in Challenges and lessons learned  
29 section below).  
30  
31  
32  
33  
34  
35  
36  
37  
38  
39

40 Figure 1 summarizes available data from the current study, SHINE, as well as the original NICHD SECCYD  
41 in the context of the timeline of these data collections.  
42  
43  
44

45 Informed consent and assent for the original NICHD SECCYD were obtained from parents and children,  
46 respectively. Informed consent for the NICHD SECCYD follow-up study, SHINE, was obtained from the now adult  
47 target participants. For the NICHD SECCYD, the research was approved by the Institutional Review Boards (IRB)  
48 of each university-based study site. For SHINE, the research was approved by the Human Subjects Division (HSD)  
49 of the University of Washington. All methods were carried out in accordance with relevant guidelines and  
50 regulations.[37] Participants were financially compensated in the original NICHD SECCYD and at each follow-up,  
51 including the current study, based on time and burden and in alignment with the IRBs and UW HSD.  
52  
53  
54  
55  
56  
57

### **Participation rates:**

The 927 participants (468 [50.5%] women, 459 men [49.5%]) available for recruitment in the current study were contacted using information from prior assessments. Contacts were initiated via email, phone, text, or social media, including Facebook and LinkedIn. Efforts to update participant contact information included reaching out to alternative contacts such as parents or grandparents, searching social media sites, mailing postcards to physical addresses, and using paid, secured services offered through White Pages, LexisNexis, and TransUnion. Over time, various ad hoc strategies were used to further incentivize participation, including increasing the study payment (e.g., from \$250 to \$300 to \$400 over time for completion of the full protocol), offering payment for screening, engaging participants through newsletters and e-cards, and developing alternate protocols that allowed flexibility in completing only portions of the study or in completing some portions of the study remotely and independently.

Extensive recruitment efforts resulted in the following participation rates. In the full sample, 705 (of 927; 76.1%) individuals participated in the study. Of the 222 non-participants, 31 (13.9%) declined, primarily due to being too busy, 6 (2.7%) rescinded their consent for future contact, 79 (35.6%) were initially engaged but did not follow up, 90 (40.5%) were unresponsive to all contact efforts (using contact information that was presumed to be valid but was not verified), 13 (5.9%) had no contact information, and 3 (1.4%) were confirmed to be incarcerated during the period of recruitment. With respect to sex assigned at birth, 378 (of 468; 80.8%) women and 327 (of 459; 71.2%) men participated in the study, reflecting a significant difference in rates of participation with women more likely to participate ( $\chi^2(1, N=927) = 11.5, p < .001$ ). Five participants no longer identified as the sex assigned at birth. Instead, two participants identified as transgender male, one as transgender female, and two as non-binary. Finally, participation rates by original recruitment site were as follows: Seattle, WA (88.1%); Madison, WI (75.5%); Irvine, CA (76.2%); Pittsburgh, PA (76.6%); Wellesley, MA (67.0%); Little Rock, AR (85.2%); Philadelphia, PA (71.9%); Morganton, NC (65.3%); Lawrence, KS (79.6%); and Charlottesville, VA (78.3%). However, reports of rates by original recruitment site are misleading insofar as a sizable proportion of participants (221 [31.3%]) had relocated and completed the protocol at a different main or ancillary site or chose to complete one of the remote protocols even if they were within travel distance. Of note, all participants were offered paid travel accommodations to reduce barriers to in-person participation.

### **Data collection overview:**

All participants were engaged using an introductory letter describing the study, followed by phone and email contacts. Exclusions were temporary, including pregnancy or breastfeeding and current/recent cold or flu,

1  
2  
3 and participants were followed and re-screened as necessary to identify changes in eligibility. Women who were  
4 not using medications affecting their menstrual cycle, and who could predict the start of their period within 5  
5 days, were scheduled to participate in the early follicular phase between menstrual cycle days 2-7. All  
6 participants were invited to participate in the full study protocol with paid accommodations for travel offered  
7 when necessary. However, based on participant preferences and circumstances, alternate study protocols were  
8 also developed to reduce the time/burden of study participation. Of the 705 participants, 551 (78.2%)  
9 participated in the full study protocol which entailed an in-person home visit (3-4 hours) and two post-visit  
10 activities occurring over a 1- to 2-week period. Sixteen (2.3%) participated in the partial study protocol, which  
11 entailed a standard subset of study activities. Ninety-nine (14.0%) participated in the self-administered study  
12 protocol, which entailed a standard subset of study activities that could be performed by the participant  
13 remotely and independently. Finally, 39 (5.5%) completed the study questionnaires only. See details in the 'Data  
14 collection protocols' section below.  
15  
16  
17  
18  
19  
20  
21  
22  
23  
24

25 The structure of the data collection both retained and built on the 10 original recruitment sites. At each  
26 of these 10 main sites, a data collector and mobile phlebotomist were hired and trained to administer the study  
27 protocol. The study visits occurred primarily in the homes of the participants. However, based on the locations  
28 of participants, at times, a central location for data collection was established (e.g., in a rented professional  
29 office space) and the participants would travel to the data collection team. After each study visit, all associated  
30 research materials were returned to the UW research team in Seattle WA who managed and oversaw the data  
31 collection efforts at all locations throughout the study period. At the study visit, a standard paper form was used  
32 to record the collected data in real-time (e.g., blood pressure readings) and to document compliance with each  
33 step of the data collection protocol. The information on this form was entered into the online data capture tool,  
34 REDCap, while the visit was still on-going, making it immediately available to the UW research team to review  
35 and intervene (if needed) before the visit ended. Limited paperwork, including the form referenced above, and  
36 the hair samples were shipped by regular mail and the processed blood samples were immediately placed on  
37 dry ice and shipped overnight by FedEx. The UW research team also conducted all of the post-visit research  
38 activities as well as the three study protocols that did not have an in-person component.  
39  
40  
41  
42  
43  
44  
45  
46  
47  
48  
49

50 All data collectors and mobile phlebotomists received intensive training led by MEB and the UW  
51 research team. The data collector training included human subjects research training (online), formal orientation  
52 to the study procedures (online), and a 2-day in-person training session at UW. The first day focused on training  
53 for each protocol segment and the second day required the successful execution of the full study protocol on a  
54  
55  
56  
57

1  
2  
3 practice participant to receive certification. The data collectors generally had college degrees with at least 3  
4 years of experience working in a research setting. All data collectors worked concurrently in relevant areas of  
5 social or health sciences (e.g., nursing, social work, psychology, public health). The mobile phlebotomist training  
6 included human subjects research training (online), formal training on the blood collection and blood processing  
7 procedures (online), and a 1-day in-person training session at UW. The in-person training required the successful  
8 execution of the blood collection and blood processing procedures on a practice participant to receive  
9 certification. The mobile phlebotomists generally had at least 2 years of experience working in mobile  
10 phlebotomy as well as experience performing blood processing. All mobile phlebotomists worked concurrently  
11 in relevant medical settings and all were required to maintain their professional credentials in their respective  
12 states. For both the data collector and mobile phlebotomist, as needed, additional training was offered in-  
13 person and online and practice supplies were provided for independent practice before beginning data  
14 collection. After data collection began, all data collection materials and samples were inspected by the UW  
15 research team, research visits were observed periodically via Zoom, and constructive feedback was provided  
16 throughout the period of data collection. Over time, 2 data collectors and 2 mobile phlebotomists left their  
17 positions and were replaced, repeating the same training process described above.  
18  
19  
20  
21  
22  
23  
24  
25  
26  
27  
28  
29

30 The 10 main data collection sites were set up over time in this order: Seattle, WA (started January 2018);  
31 Madison, WI (started May 2018); Irvine, CA (started May 2018); Pittsburgh, PA (started October 2018);  
32 Wellesley, MA (started November 2018); Little Rock, AR (started March 2019); Philadelphia, PA (started March  
33 2019); Morganton, NC (started June 2019); Lawrence, KS (started July 2019); and Charlottesville, VA (started  
34 February 2020). Once a site was set up, it generally remained open. However, intermittent disruptions were  
35 experienced based on turnover among the data collectors/mobile phlebotomists and the COVID-19 pandemic.  
36 All sites were open for at least 2 years, ranging between 2-4 years.  
37  
38  
39  
40  
41  
42  
43

44 In addition, based on the locations of participants outside of these 10 main sites, several ancillary sites  
45 were set up. A data collector and mobile phlebotomist from one of the main sites traveled to the indicated  
46 ancillary site to conduct the study protocol among a pre-identified 'cluster' of participants over a period of days.  
47 The ancillary data collection sites included the following: San Francisco Bay Area (2019); San Jose, CA (2019);  
48 Denver, CO (2020); Atlanta, GA (2020); Washington, DC (2020); New York, NY (two times in 2021); Portland, OR  
49 (2019, 2021); Kansas City, MO (2021); and Nashville, TN (2021).  
50  
51  
52  
53  
54  
55  
56  
57  
58  
59  
60

### **Data collection protocols:**

Full study protocol. The full study protocol entailed an in-person home visit (3-4 hours) and two post-visit activities occurring over a 1- to 2-week period. The in-person home visit was scheduled in the morning between 7 am and 10 am local time and included the measurement of blood pressure and anthropometrics (height, weight, and waist and hip circumferences), the collection of blood and hair samples, participation in one 24-hour diet recall interview, and the completion of self-report questionnaires in areas of health and well-being. The post-visit activities included participation in two additional 24-hour diet recall interviews (by phone) and completion of activity/sleep monitoring using an activity monitor worn 24 hours/day over a 7-day period.

Partial study protocol. The 'partial' study protocol included participation in three 24-hour diet recall interviews (by phone), completion of the self-report questionnaires (online), and completion of activity/sleep monitoring using an activity monitor worn 24 hours/day over a 7-day period. Therefore, in the 'partial' study protocol, data are missing for the assessment of blood pressure and anthropometrics as well as the collection of blood and hair samples. Among the 16 (2.3%) participants who completed this protocol, 6 (37.5%) did so because they were living outside of the US and the remainder expressed miscellaneous reasons for their preference for this protocol.

Self-administered study protocol. The 'self-administered' study protocol included the study protocol segments that could be performed by the participant remotely and independently, albeit with support and oversight by the UW research team. These segments included the measurement of blood pressure and anthropometrics (height, weight, and waist and hip circumferences), participation in three 24-hour diet recall interviews (by phone), completion of the self-report questionnaires (online), and completion of activity/sleep monitoring using an activity monitor worn 24 hours/day over a 7-day period. Participants were provided all the supplies/equipment (e.g., blood pressure monitor, flat scale, tape measure, and activity monitor) and detailed instructions necessary to complete this protocol at home. Real-time support was provided by the UW research team over phone/email at the time of the collection. Participants were also provided videos produced by the UW research team that demonstrated the correct method of taking the blood pressure and anthropometric measures. The self-administered study protocol was developed, in part, in response to the COVID-19 pandemic, allowing data collection to continue without having in-person contact with the participants. Therefore, in the 'self-administered' protocol, data are missing for the collection of blood and hair samples. Among the 99 (14.0%) participants who completed this protocol, all occurring during the pandemic, the majority (90 [90.9%]) did so because they lived in locations that were distant from one of the main or ancillary data collection sites and they

1  
2  
3 did not want to travel to the site, even though paid travel accommodations were offered. The remainder  
4 expressed miscellaneous reasons for their preference for this protocol.  
5  
6  
7

8 Questionnaires only study protocol. The 'questionnaires-only' study protocol included completion of the  
9 self-report questionnaires online with real-time support and follow-up offered by the UW research team.  
10 Therefore, in the 'questionnaires only' protocol, data are missing for all of the other study assessments (i.e.,  
11 blood pressure, anthropometrics, blood and hair samples, 24-hour diet recall interviews, and the activity  
12 monitor). Among the 39 (5.5%) participants who completed this protocol, the majority (29 [74.4%]) responded  
13 to the questionnaire link without communicating with the study team directly and the remainder expressed  
14 miscellaneous reasons for their preference for this protocol.  
15  
16  
17  
18  
19  
20  
21

22 Across the study protocols, with respect to the main data collection components, complete data are  
23 available for 647 (91.8%) participants for the blood pressure assessment, 664 (94.2%) participants for the  
24 anthropometric assessment, 527 (74.8%) participants for the blood collection, 468 (66.4%) participants for the  
25 hair collection, 700 (99.3%) for the self-report questionnaires, 664 (94.2%) participants for at least one 24-hour  
26 diet recall interview, and 581 (82.4%) participants for the valid wear of the activity monitor.  
27  
28  
29  
30  
31

### 32 **Available data:**

33  
34 Blood pressure assessment. The circumference of the participant's bare upper arm was measured first  
35 to enable selection of the correct cuff size. Next, the participant was directed to sit at a table in a relaxed  
36 position with legs uncrossed, feet flat on the floor, and no talking for a 5-minute rest period. Following the rest  
37 period, the pre-selected cuff was correctly positioned on the left arm with the arm resting on the table at heart  
38 level. A research grade, automated blood pressure monitor was used, pre-programmed to take three  
39 consecutive measurements with one minute in between readings. The cuff was then re-positioned on the right  
40 arm and the measurements were repeated.  
41  
42  
43  
44  
45  
46

47 Anthropometric assessment. The participant was directed to remove shoes, all excess clothing and  
48 accessories, and any items from pockets. First, a research grade flat scale was positioned on a hard surfaced  
49 floor to measure weight. Next, a research grade stadiometer was assembled and positioned against an open  
50 wall to measure height. The height measurement was taken with the participant's heels, hips, shoulders, and  
51 head aligned along the back of the stadiometer. Finally, a tension-controlled tape measure was positioned at the  
52 midpoint between the iliac crest and lowest rib to measure waist circumference (on the exhalation) and re-  
53  
54  
55  
56  
57

1  
2  
3 positioned at the widest point of the hips to measure hip circumference.  
4  
5

6 Blood sample collection. The participant's blood was drawn from the arm in a seated or supine position  
7  
8 by a trained phlebotomist. The blood draw occurred in the morning between 7 am and 10 am following an  
9  
10 overnight fast starting at 9 pm. Other restrictions included cessation of exercise, alcohol intake, and  
11  
12 nonessential cold/allergy and headache medications 12 hours prior, the cessation of caffeine 8 hours prior, and  
13  
14 the cessation of nicotine 1 hour prior. Following the draw, the blood was processed and aliquoted on site. The  
15  
16 samples were then placed on dry ice and packaged for shipment by FedEx overnight to the UW research team  
17  
18 who received and stored them at -80 degrees Celsius for later analysis. In batch, assays were performed in areas  
19  
20 of cardiometabolic health (e.g., total cholesterol, high-density lipoprotein [HDL], low-density lipoprotein [LDL],  
21  
22 triglycerides, glucose, insulin, hemoglobin A1c) and inflammation (e.g., c-reactive protein [CRP]).

23 Hair sample collection. The target area on the participant's head (posterior vertex) was identified and 2  
24  
25 to 3 'bundles' of hair were tied off in this region, together equaling in quantity the diameter of a standard  
26  
27 writing pen. These bundles were then cut close to the scalp and affixed to a pre-prepared foil envelope for  
28  
29 shipment by regular mail to the UW research team who inspected and stored the hair samples at room  
30  
31 temperature for later analysis. If necessary, hair outside of the target area was taken, excluding facial hair or hair  
32  
33 along the hairline. Participants also completed a self-report questionnaire regarding hair washing and use of hair  
34  
35 care products and styling tools. In batch, assays were performed to assess hair cortisol, indexing the activity of  
36  
37 the hypothalamic-pituitary-adrenal (HPA) axis as a marker of psychological stress experienced over the  
38  
39 preceding months.

40 Diet recall interviews. The participant's dietary intake over the prior 24 hours was assessed using the  
41  
42 computer-based Automated Self-Administered 24-Hour Dietary Assessment (ASA24).[38] One ASA24 interview  
43  
44 was conducted in-person and two others were conducted over the phone, all occurring over a one-week period  
45  
46 with one interview referencing a weekend day. Data collected through these interviews was scored using the  
47  
48 Healthy Eating Index-2015 (HEI-2015) scoring system developed by the US Department of Agriculture.[39] This  
49  
50 scoring system produces an overall diet quality score as well as 13 values related to key nutrients or food  
51  
52 components based on US Department of Health & Human Services 2015-2020 Dietary Guidelines.

53 Activity monitor wear. The participant was directed to wear an activity monitor on the right hip during  
54  
55 the day for the assessment of activity and on the wrist of the nondominant hand during the night for the  
56  
57

1  
2  
3 assessment of sleep. The duration of wear was 24 hours per day for seven consecutive days, including two  
4 weekend days. The participant completed a log during this period, recording wake and sleep times each day.  
5  
6 Additional instructions were provided regarding the removal of the device when exposed to water. The activity  
7  
8 monitor was provided by mailing it to the participant along with a postage-paid box for the participant to use to  
9  
10 return the monitor following wear. Upon return of the activity monitor, the data were then exported from the  
11  
12 device and scored using proprietary software to derive activity variables such as moderate/vigorous activity,  
13  
14 number of steps, and sedentary time as well as sleep variables such as sleep latency, duration, and awakenings.  
15

16  
17 **Self-report questionnaires.** The participant completed a comprehensive set of self-report questionnaires  
18  
19 using the online data capture tool, REDCap. The participant was assisted by the UW research team (either in-  
20  
21 person or remotely depending on the study protocol) who provided oversight, general support, and referrals to  
22  
23 diverse support services. In summary, the questionnaires pertained to sociodemographic and neighborhood  
24  
25 characteristics; medical, reproductive, and psychiatric history; health behaviors in areas of smoking, exercise,  
26  
27 nutrition, and sleep; cognitive function in areas of executive functioning and decision-making; stress, adverse  
28  
29 events, and psychological well-being, including depression and anxiety symptoms; and family composition and  
30  
31 family, social, and romantic relationships.

32  
33 In these areas, specific questionnaires were selected based on psychometric evaluation showing high  
34  
35 reliability and validity. As well, a subset of questionnaires was retained due to their use in the original NICHHD  
36  
37 SECCYD. Although too numerous to list, examples of these questionnaires include: health behaviors (e.g., Dietary  
38  
39 Screening Questionnaire [DSQ],[40] Pittsburgh Sleep Quality Index [PSQI][41]); stress and adversity (e.g.,  
40  
41 Perceived Stress Scale [PSS],[42] Stress and Adversity Inventory for Adults [STRAIN][43]), psychological well-  
42  
43 being (e.g., Center for Epidemiologic Studies Depression [CESD],[44] Adult Self Report [ASR][45]), and social  
44  
45 relationships (e.g., Dyadic Adjustment Scale [DAS],[46] Experiences in Close Relationships – Relationship  
46  
47 Structures questionnaire [ECR-RS][47]).  
48  
49

### **Challenges and lessons learned:**

50  
51 The study's original efforts to implement phlebotomy services in the numerous locations of the study  
52  
53 participants included use of advertised mobile phlebotomy companies. These efforts failed, however, as such  
54  
55 companies were not able to provide well-trained phlebotomists, were not able to provide coverage for the  
56  
57 geographical locations of the participants, and were not positioned to properly train their employees to perform  
58  
59 the study protocol. As a result, the study transitioned to an independent contractor model in which mobile  
60  
61 phlebotomists were sought through indeed.com, interviewed and trained remotely, and then brought to UW to



1  
2  
3 be certified in the proper implementation of the blood collection and blood processing protocols. As  
4 independent contractors, the mobile phlebotomists were provided liability insurance, a centrifuge if needed,  
5 and all indicated supplies. Otherwise, expenses such as gas mileage were covered in their contracts as a part of  
6 their per participant payment. Although the independent contractor model required more time for recruitment,  
7 training, and on-going administrative tasks related to contracts and invoicing, it was superior to other options  
8 and produced a higher quality blood sample collection.  
9  
10  
11  
12  
13  
14

15 In a related issue, the study's original efforts to freeze and ship the blood samples included attempts to  
16 find common in-field storage locations that could store and send the samples in batch as they accumulated.  
17 These efforts failed, however, as few lab entities offered such services, it was impossible to cover the  
18 geographical locations of the participants, and any available services were cost prohibitive. As a result, the study  
19 transitioned to the use of dry ice with individual blood sample shipments sent by the mobile phlebotomist after  
20 each study visit. The challenges associated with this approach included limited availability of dry ice in some  
21 geographical areas, human error in measuring the correct quantity of dry ice, and variability in the proximity of  
22 FedEx facilities that accept packages containing dry ice. Despite these challenges, this approach overall was  
23 superior to other options. In all, seven shipments arrived thawed, three due to human error (not enough dry ice)  
24 and four due to FedEx delays. However, an add-on protocol in which participants were asked to do a second  
25 blood draw if needed was used to re-draw samples for five participants, leaving only two participants with  
26 ruined samples. Additional compensatory efforts were developed to use 'extra' dry ice and to avoid shipments  
27 around holiday times and bad weather.  
28  
29  
30  
31  
32  
33  
34  
35  
36  
37

38 A final main challenge, not unique to the current study, pertained to the COVID-19 pandemic. In mid-  
39 2020, following a university mandated 3-month discontinuation of all in-person research, the current study  
40 faced the decision of whether to resume in-person research. At this crossroads, the 'self-administered' study  
41 protocol was developed to offer participants an option to complete the study assessments that were able to be  
42 completed remotely and independently. As a part of this protocol, extensive work was put into the construction  
43 of custom shipping boxes to send supplies and equipment (e.g., blood pressure monitor, flat scale) and the  
44 development of a website that housed videos and special instructions regarding the correct collection of each  
45 measure. Although this protocol, by definition, meant the blood and hair sample collections would be missing, it  
46 allowed the study to move forward with another assessment approach in its toolkit. Moreover, the 'self-  
47 administered' protocol remains broadly useful for all research conducted from a distance. Subsequently,  
48 additional add-on protocols were devised to collect the in-person data missed during this period.  
49  
50  
51  
52  
53  
54  
55  
56  
57

**Patient and public involvement:**

No patient or public involvement.

**FINDINGS TO DATE**

The sociodemographic characteristics of the sample are described in Table 1. On average, the participants were 28.6 years of age (range: 26.2-31.3 years). With respect to ethnicity, 6.4% were Hispanic and 93.6% non-Hispanic, while the examination of race showed 14.9% belonged to historically marginalized groups, including 10.2% Black, 1.1% Asian/Pacific Islander, and 0.2% American Indian/Alaska Native (Eskimo, Aleutian) as well as 3.4% who were mixed race. Most participants (71.6%) reported being in a current romantic relationship and 26.1% had at least one child. Overall, the sample was well-educated with 55.6% of participants, including 58.5% of women and 52.2% of men, having a college degree or greater. This compares to 40.0% in the population, according to 2019 US Census reports of educational attainment among individuals between 25-34 years.[48] Notably, 13.6% of participants were current students, full or part-time. Of these, 69.5% were pursuing degrees at the college level or greater. If the anticipated degrees are obtained, the number of participants with a college degree or greater will grow to 59.6% of the full sample, and 64.0% of women and 54.3% of men. In addition, 39.4% of participants reported an individual income of \$50,000 or greater and 30.1% of participants reported a household income of \$100,000 or greater. Only 2.9% of participants indicated that paying for basics such as food was 'very' or 'extremely' difficult and only 9.6% of participants were living below the poverty line. However, 38.3% of participants reported they would not be able to maintain their current standard of living for more than 2 months if they lost their income, reflecting some financial instability. In sum, inspection of the sociodemographic characteristics of the sample revealed an overall pattern of relative socioeconomic advantage among the participants on most parameters of education and income.

Table 1. Description of sociodemographic characteristics in the full sample and in women and men separately.

|                          | <b>Total<sup>†</sup></b><br><b>(n=705)</b><br><i>N (%) or mean (SD), range</i> | <b>Women<sup>†</sup></b><br><b>(n=378)</b><br><i>N (%) or mean (SD), range</i> | <b>Men<sup>†</sup></b><br><b>(n=327)</b><br><i>N (%) or mean (SD), range</i> |
|--------------------------|--------------------------------------------------------------------------------|--------------------------------------------------------------------------------|------------------------------------------------------------------------------|
| <b>Age (in years)</b>    | 28.6 (1.2), 26.2-31.3                                                          | 28.7 (1.2), 26.2-31.2                                                          | 28.6 (1.2), 26.4-31.3                                                        |
| <b>Race/ethnicity:</b>   |                                                                                |                                                                                |                                                                              |
| Hispanic                 | 45 (6.4%)                                                                      | 19 (5.0%)                                                                      | 26 (8.0%)                                                                    |
| White, non-Hispanic      | 555 (78.7%)                                                                    | 303 (80.1%)                                                                    | 252 (77.0%)                                                                  |
| Black, non-Hispanic      | 72 (10.2%)                                                                     | 40 (10.6%)                                                                     | 32 (9.8%)                                                                    |
| Asian/PI, non-Hispanic   | 8 (1.1%)                                                                       | 4 (1.1%)                                                                       | 4 (1.2%)                                                                     |
| AI/AN, non-Hispanic      | 1 (0.2%)                                                                       | 0 (0.0%)                                                                       | 1 (0.3%)                                                                     |
| Mixed race, non-Hispanic | 24 (3.4%)                                                                      | 12 (3.2%)                                                                      | 12 (3.7%)                                                                    |

|                                           |                                           |                                           |                                           |
|-------------------------------------------|-------------------------------------------|-------------------------------------------|-------------------------------------------|
| <b>Family composition:</b>                |                                           |                                           |                                           |
| People living in home                     | 2.7 (1.4), 1-10                           | 2.8 (1.4), 1-10                           | 2.5 (1.3), 1-7                            |
| Married or living as married              | 241 (34.4%)                               | 150 (39.7%)                               | 91 (28.3%)                                |
| Current romantic relationship             | 501 (71.6%)                               | 295 (78.0%)                               | 206 (64.0%)                               |
| One or more children                      | 183 (26.1%)                               | 123 (32.5%)                               | 60 (18.6%)                                |
| <b>Education:</b>                         |                                           |                                           |                                           |
| Less than HS diploma                      | 7 (1.0%)                                  | 1 (0.3%)                                  | 6 (1.9%)                                  |
| HS diploma/GED                            | 88 (12.6%)                                | 41 (10.8%)                                | 47 (14.6%)                                |
| Some college, AA, certificate, trade      | 216 (30.8%)                               | 115 (30.4%)                               | 101 (31.3%)                               |
| College degree or greater                 | 389 (55.6%)                               | 221 (58.5%)                               | 168 (52.2%)                               |
| <b>Student status:</b>                    |                                           |                                           |                                           |
| Part-time                                 | 34 (4.9%)                                 | 24 (6.4%)                                 | 10 (3.1%)                                 |
| Full-time                                 | 61 (8.7%)                                 | 43 (11.4%)                                | 18 (5.6%)                                 |
| <b>Employment:</b>                        |                                           |                                           |                                           |
| Part-time, for pay                        | 85 (12.1%)                                | 59 (15.6%)                                | 26 (8.1%)                                 |
| Full-time, for pay                        | 516 (73.7%)                               | 256 (67.7%)                               | 260 (80.7%)                               |
| <b>Individual income:</b>                 |                                           |                                           |                                           |
| <\$10,000                                 | 78 (11.1%)                                | 48 (12.7%)                                | 30 (9.3%)                                 |
| \$10,000-\$29,999                         | 167 (23.9%)                               | 104 (27.5%)                               | 63 (19.6%)                                |
| \$30,000-\$49,999                         | 179 (25.6%)                               | 89 (23.5%)                                | 90 (27.9%)                                |
| \$50,000-\$99,999                         | 213 (30.4%)                               | 111 (29.4%)                               | 102 (31.7%)                               |
| \$100,000+                                | 63 (9.0%)                                 | 26 (6.9%)                                 | 37 (11.5%)                                |
| <b>Household income:</b>                  |                                           |                                           |                                           |
| <\$20,000                                 | 75 (10.8%)                                | 43 (11.4%)                                | 32 (10.0%)                                |
| \$20,000-\$49,999                         | 163 (23.5%)                               | 90 (23.9%)                                | 63 (22.9%)                                |
| \$50,000-\$99,999                         | 248 (35.7%)                               | 127 (33.8%)                               | 121 (37.9%)                               |
| \$100,000-\$149,999                       | 126 (18.1%)                               | 74 (19.7%)                                | 52 (16.3%)                                |
| \$150,000+                                | 83 (11.9%)                                | 42 (11.2%)                                | 41 (12.9%)                                |
| <b>Financial disadvantage:</b>            |                                           |                                           |                                           |
| Very/extreme difficulty paying for basics | 20 (2.9%)                                 | 14 (3.7%)                                 | 6 (1.9%)                                  |
| <2-month safety net if lost income        | 268 (38.3%)                               | 149 (39.6%)                               | 119 (37.1%)                               |
| Adjusted household income*                | \$46,176 (\$36,509),<br>\$1,667-\$287,500 | \$43,312 (\$33,467),<br>\$1,667-\$162,500 | \$49,552 (\$39,586),<br>\$2,500-\$287,500 |
| Income-to-needs ratio*                    | 4.7 (3.5), 0.3-22.0                       | 4.6 (3.5), 0.3-17.8                       | 4.8 (3.5), 0.3-22.0                       |
| Income below the poverty line             | 67 (9.6%)                                 | 38 (10.1%)                                | 29 (9.1%)                                 |
| Income 1.0-1.9 times the poverty line     | 95 (13.7%)                                | 62 (16.5%)                                | 33 (10.3%)                                |
| Income 2.0-2.9 times the poverty line     | 86 (12.4%)                                | 42 (11.2%)                                | 44 (13.8%)                                |
| Income >=3 times the poverty line         | 447 (64.3%)                               | 234 (62.2%)                               | 213 (66.8%)                               |

Abbreviations: PI=Pacific Islander; AI=American Indian; AN=Alaska Native; HS=high school; GED=general equivalency diploma; AA=Associates degree.

†Missing data: 5 participants did not complete the questionnaire items pertaining to family composition, education, employment, and individual income. 7 participants did not complete the questionnaire items pertaining to student status. 10 participants did not complete the questionnaire items pertaining to household income.

\*Definitions: Adjusted household income is the total household income divided by the number of individuals identified as being dependent on the income. Income-to-needs ratio is the total household income divided by the US Census poverty threshold for the number of individuals identified as being dependent on the income without respect to their relation to one another.

Information pertaining to the cardiometabolic health status of the sample is described in Table 2. Each health status indicator is first presented as a continuous variable and then as a categorical variable, coded according to established clinical guidelines. On average, the participants were overweight (mean BMI=27.8) with

52.7% of women and 63.4% of men in overweight/obese categories. Within the obese category, 5.9% of women and 6.4% of men were considered class III or severely obese. Compared to national estimates in similar-age groups (20-39 years), the percent of obese participants in the current study (29.8%) was comparable to the percent obese in the National Health Interview Survey (NHIS) (i.e., 28.5%)[49] but was lower than in the National Health and Nutrition Examination Survey (NHANES) (i.e., 39.8%).[50] In addition, in line with the distribution of BMI, 53.0% were in the high/very high range for waist circumference, reflecting significant central adiposity in the sample. With respect to blood pressure, 23.6% of women and 35.9% of men were hypertensive according to the American College of Cardiology and American Heart Association guidelines (SBP  $\geq$ 130 or DBP  $\geq$ 80), exceeding national estimates reported in NHANES (i.e., 13.0% in women and 31.2% in men) among individuals 18-39 years.[51] Moreover, a substantial number of women, 6.4% and 29.0%, were in the pre-diabetic (A1c 5.7%-6.4%) and diabetic (A1c  $>$ 6.4%) ranges, respectively, for hemoglobin A1c as were 7.0% and 22.1% of the men, respectively. As with hypertension, these numbers exceed national estimates reported in NHANES (i.e., 13% diabetic) among individuals 18 years of age or older.[52] In sum, inspection of the health status indicators in the sample revealed a distinct pattern of poor cardiometabolic health with a sizable proportion of the sample displaying values in clinically meaningful risk ranges, especially in areas of obesity, hypertension, and diabetes.

Table 2. Description of health status indicators in the full sample and in women and men separately.

|                                              | <b>Total<sup>†</sup></b><br><b>(n=705)</b><br>N (%) or mean (SD), range | <b>Women<sup>†</sup></b><br><b>(n=378)</b><br>N (%) or mean (SD), range | <b>Men<sup>†</sup></b><br><b>(n=327)</b><br>N (%) or mean (SD), range |
|----------------------------------------------|-------------------------------------------------------------------------|-------------------------------------------------------------------------|-----------------------------------------------------------------------|
| <b>Body Mass Index (BMI)</b>                 |                                                                         |                                                                         |                                                                       |
| BMI (kg/m <sup>2</sup> )                     | 27.8 (7.1), 16.7-65.9                                                   | 27.5 (7.2), 16.7-59.3                                                   | 28.2 (6.9), 16.8-65.9                                                 |
| Underweight, <18.5                           | 13 (1.9%)                                                               | 9 (2.5%)                                                                | 4 (1.3%)                                                              |
| Normal, 18.5-24.9                            | 268 (40.4%)                                                             | 158 (44.8%)                                                             | 110 (35.3%)                                                           |
| Overweight, 25.0-29.9                        | 185 (27.9%)                                                             | 79 (22.4%)                                                              | 106 (34.1%)                                                           |
| Obese, $>$ 30.0                              | 198 (29.8%)                                                             | 107 (30.3%)                                                             | 91 (29.3%)                                                            |
| Class I obesity, 30.0-34.9                   | 101 (15.2%)                                                             | 56 (15.9%)                                                              | 45 (14.5%)                                                            |
| Class II obesity, 35.0-39.9                  | 56 (8.4%)                                                               | 30 (8.5%)                                                               | 26 (8.4%)                                                             |
| Class III obesity, 40.0+                     | 41 (6.2%)                                                               | 21 (5.9%)                                                               | 20 (6.4%)                                                             |
| <b>Waist Circumference (WC)</b>              |                                                                         |                                                                         |                                                                       |
| WC (cm)                                      | 92.2 (17.8), 62.2-180.0                                                 | 87.9 (16.4), 62.2-149.4                                                 | 97.1 (18.2), 64.6-180.0                                               |
| High: 80-88 cm, women; 94-102 cm, men        | 115 (17.7%)                                                             | 60 (17.3%)                                                              | 55 (18.2%)                                                            |
| Very high: $>$ 88 cm, women; $>$ 102 cm, men | 229 (35.3%)                                                             | 146 (42.2%)                                                             | 83 (27.4%)                                                            |
| <b>Blood Pressure (BP)</b>                   |                                                                         |                                                                         |                                                                       |
| Systolic BP (SBP) (mmHg)                     | 115.2 (12.9), 83.7-167.3                                                | 109.5 (11.0), 83.7-153.3                                                | 121.6 (11.8), 84.7-167.3                                              |
| Diastolic BP (DBP) (mmHg)                    | 73.1 (10.2), 45.7-104.0                                                 | 72.4 (10.1), 48.7-99.3                                                  | 73.9 (10.2), 45.7-104.0                                               |
| SBP $\geq$ 130 mmHg or DBP $\geq$ 80 mmHg    | 190 (29.4%)                                                             | 81 (23.6%)                                                              | 109 (35.9%)                                                           |
| <b>Total Cholesterol</b>                     |                                                                         |                                                                         |                                                                       |
| Total cholesterol (mg/dL)                    | 169.1 (33.7), 83-296                                                    | 167.4 (31.7), 85-289                                                    | 171.1 (35.8), 83-296                                                  |

|                                            |                      |                      |                      |
|--------------------------------------------|----------------------|----------------------|----------------------|
| Total cholesterol, $\geq 200$ mg/dL        | 94 (17.8%)           | 44 (15.5%)           | 50 (20.5%)           |
| <b>High-Density Lipoprotein (HDL)</b>      |                      |                      |                      |
| HDL (mg/dL)                                | 53.9 (13.3), 24-106  | 57.2 (12.6), 29-96   | 50.1 (13.1), 24-106  |
| HDL $< 50$ mg/dL, women; $< 40$ mg/dL, men | 131 (24.9%)          | 78 (27.6%)           | 53 (21.7%)           |
| <b>Low-Density Lipoprotein (LDL)</b>       |                      |                      |                      |
| LDL (mg/dL)                                | 97.5 (29.5), 23-223  | 93.6 (27.4), 23-192  | 102.1 (31.2), 26-224 |
| LDL $\geq 130$ mg/dL                       | 70 (13.3%)           | 26 (9.2%)            | 44 (18.0%)           |
| <b>Fasting Triglycerides</b>               |                      |                      |                      |
| Triglycerides (mg/dL)                      | 88.7 (55.8), 27-538  | 83.4 (47.4), 27-393  | 94.8 (63.6), 29-538  |
| Triglycerides, $\geq 150$ mg/dL            | 48 (9.1%)            | 21 (7.4%)            | 27 (11.1%)           |
| <b>Fasting Glucose</b>                     |                      |                      |                      |
| Glucose (mg/dL)                            | 91.5 (18.9), 63-293  | 89.5 (18.1), 63-293  | 93.7 (19.5), 66-273  |
| Glucose $\geq 100$ mg/dL                   | 41 (7.8%)            | 12 (4.2%)            | 29 (11.9%)           |
| <b>Fasting Insulin</b>                     |                      |                      |                      |
| Insulin ( $\mu$ U/mL)                      | 10.0 (8.3), 0.1-70.2 | 10.2 (8.0), 0.6-67.6 | 9.8 (8.6), 0.1-70.2  |
| Insulin $\geq 20$ $\mu$ U/mL               | 43 (8.2%)            | 24 (8.5%)            | 19 (7.8%)            |
| <b>Hemoglobin A1c</b>                      |                      |                      |                      |
| HbA1c (%)                                  | 5.3 (2.3), 0.6-23.3  | 5.3 (2.2), 0.6-17.1  | 5.2 (2.4), 1.3-23.3  |
| HbA1c normal, $< 5.7\%$                    | 355 (67.4%)          | 182 (64.3%)          | 173 (70.9%)          |
| HbA1c prediabetes, 5.7% - 6.4%             | 36 (6.8%)            | 19 (6.7%)            | 17 (7.0%)            |
| HbA1c diabetes, $> 6.4\%$                  | 136 (25.8%)          | 82 (29.0%)           | 54 (22.1%)           |
| <b>C-reactive Protein (CRP)</b>            |                      |                      |                      |
| CRP (mg/L)                                 | 4.5 (4.4), 0.01-21.2 | 5.0 (4.6), 0.01-21.2 | 4.0 (4.0), 0.01-17.8 |
| CRP $\geq 10$ mg/L                         | 65 (12.3%)           | 39 (13.8%)           | 26 (10.7%)           |

†Missing data: 41 participants do not have anthropometric data, 95.1% because they participated in a protocol that did not collect these data and 4.9% for a miscellaneous reason. 58 participants do not have blood pressure data, 94.8% because they participated in a protocol that did not collect these data and 5.2% for a miscellaneous reason. 178 participants do not have blood samples, 86.0% because they participated in a protocol that did not collect these data and 14.0% for a miscellaneous reason (e.g., refused the blood draw, sample thawed in transit). Sources of data: For BMI, 2.3% of values were derived from self-reported height and weight in the 'partial' study protocol and 14.9% of values were derived from measurements taken in the 'self-administered' study protocol. For WC and BP, 15.3% of values were derived from measurements taken in the 'self-administered' protocol.

Information pertaining to relevant health behaviors that may account for the health status of the sample is described in Table 3. With respect to cigarette smoking, 27.5% of participants identified as current or past smokers. The number of current smokers (14.9%) was comparable to national estimates (i.e., 14.1%) among similar-age individuals (25-44 years) as was the pattern of smoking between women and men (13.0% vs. 17.1%, respectively) with men more likely to smoke.[53] Based on 24-hour diet recalls, the Healthy Eating Index-2015 (HEI-2015)[39], a marker of diet quality reflecting the degree of alignment with dietary guidelines, was low (mean HEI-2015=50.2) as compared to an ideal score of 100, indicating complete alignment with dietary guidelines. This value was also lower than national estimates (i.e., 53 between 19-30 years and 58 between 31-59 years), but in line with the poor diets of Americans in general.<sup>39</sup> In parallel, intake of fruits and vegetables was low with only 6.9% and 17.9%, respectively, meeting the daily recommendation for intake in these food groups. This is also in line with the low intake of fruits (i.e., 12.3%) and vegetables (i.e., 10.0%) in the US population.[54] Finally, using actigraphy, patterns of activity and sleep were examined. On average, the time engaged in

moderate, vigorous, or very vigorous activity was 1.3 hours/day while sedentary time was 4.5 hours/day with only 15.9% of participants walking 10,000+ steps per day. On average, the participants slept 7.3 hours/night, 38.6% slept less than the recommended 7-9 hours of sleep/night, and 41.0% had sleep efficiency scores <85%, indicating disrupted sleep. Moreover, the global PSQI[41] showed 45.6% had a score of six or greater, reflecting significant sleep problems. In sum, inspection of the health behavior indicators in the sample revealed a general pattern of behaviors related to poor dietary habits, low levels of activity, and disrupted sleep which tracks and may explain the poor health status of the sample on parameters of cardiometabolic risk.

Table 3. Description of health behavior indicators in the full sample and in women and men separately.

|                                     | <b>Total<sup>†</sup></b><br><b>(n=705)</b><br>N (%) or mean (SD), range | <b>Women<sup>†</sup></b><br><b>(n=378)</b><br>N (%) or mean (SD), range | <b>Men<sup>†</sup></b><br><b>(n=327)</b><br>N (%) or mean (SD), range |
|-------------------------------------|-------------------------------------------------------------------------|-------------------------------------------------------------------------|-----------------------------------------------------------------------|
| <b>Smoking:</b>                     |                                                                         |                                                                         |                                                                       |
| Current                             | 104 (14.9%)                                                             | 49 (13.0%)                                                              | 55 (17.1%)                                                            |
| Current cigarettes/day              | 7.5 (6.3), <1-20                                                        | 7.1 (5.5), <1-20                                                        | 7.9 (7.0), <1-20                                                      |
| Past                                | 88 (12.6%)                                                              | 25 (6.6%)                                                               | 63 (19.5%)                                                            |
| Past cigarettes/day                 | 7.9 (8.3), <1-45                                                        | 5.8 (4.9), <1-15                                                        | 8.7 (9.2), <1-45                                                      |
| Age last quit                       | 24.6 (3.2), 12-29                                                       | 25.0 (3.2), 19-29                                                       | 24.5 (3.2), 12-29                                                     |
| Current/past                        | 192 (27.5%)                                                             | 74 (19.6%)                                                              | 118 (36.6%)                                                           |
| Never                               | 507 (72.5%)                                                             | 303 (80.4%)                                                             | 204 (63.4%)                                                           |
| <b>24-Hour Diet Recall:</b>         |                                                                         |                                                                         |                                                                       |
| Health Eating Index-2015 (HEI-2015) | 50.2 (11.0), 22.4-86.7                                                  | 51.3 (10.9), 22.7-86.7                                                  | 49.0 (11.0), 22.4-84.3                                                |
| Vegetable, cup equivalents          | 1.8 (1.1), 0.0-6.8                                                      | 1.8 (1.0), 0.0-6.8                                                      | 1.9 (1.1), 0.2-5.7                                                    |
| Fruit, cup equivalents              | 0.7 (0.8), 0.0-10.5                                                     | 0.7 (0.7), 0.0-4.3                                                      | 0.7 (1.0), 0.0-10.5                                                   |
| Vegetable, meets daily guideline*   | 119 (17.9%)                                                             | 74 (21.0%)                                                              | 45 (14.5%)                                                            |
| Fruit, meets daily guideline*       | 46 (6.9%)                                                               | 24 (6.8%)                                                               | 22 (7.1%)                                                             |
| <b>Actigraphy, Activity Level:*</b> |                                                                         |                                                                         |                                                                       |
| Very vigorous activity (min/day)    | 2.1 (4.7), 0.0-35.9                                                     | 2.0 (4.2), 0.0-33.0                                                     | 2.2 (5.2), 0.0-35.9                                                   |
| Vigorous activity (min/day)         | 8.9 (16.7), 0.0-177.5                                                   | 8.7 (15.9), 0.0-117.0                                                   | 9.1 (17.7), 0.0-177.5                                                 |
| Moderate activity (min/day)         | 65.0 (44.0), 1.8-333.2                                                  | 61.5 (42.0), 8.7-308.3                                                  | 69.3 (46.0), 1.8-333.2                                                |
| Number of steps per day             | 7,368.9 (2,782.8),<br>1,233.9-16,330.6                                  | 7,189.7 (2,546.6),<br>1,692.4-16,330.6                                  | 7,579.8 (3,028.7),<br>1,233.9-15,656.7                                |
| Number of steps 10,000+             | 92 (15.9%)                                                              | 38 (12.1%)                                                              | 54 (20.3%)                                                            |
| Sedentary time (min/day)            | 271.2 (108.6), 23.7-609.3                                               | 252.8 (98.5), 31.3-609.3                                                | 292.8 (115.9), 23.7-604.5                                             |
| <b>Actigraphy, Sleep:*</b>          |                                                                         |                                                                         |                                                                       |
| Sleep efficiency*                   | 85.0 (6.1), 52.8-97.3                                                   | 85.2 (5.6), 61.1-97.3                                                   | 84.7 (6.7), 52.8-97.1                                                 |
| Sleep efficiency <85%               | 238 (41.0%)                                                             | 123 (38.8%)                                                             | 115 (43.6%)                                                           |
| Total sleep time (hours)            | 7.3 (1.0), 4.0-11.7                                                     | 7.5 (1.0), 4.5-11.7                                                     | 7.0 (1.0), 4.0-10.2                                                   |
| Sleep <7 hours                      | 224 (38.6%)                                                             | 94 (29.7%)                                                              | 130 (49.2%)                                                           |
| Number of awakenings                | 19.8 (7.4), 2.2-48.3                                                    | 19.7 (7.2), 2.2-47.0                                                    | 19.8 (7.7), 3.0-48.3                                                  |
| Average awakening length (min)      | 3.7 (1.4), 1.3-13.4                                                     | 3.7 (1.2), 1.3-8.5                                                      | 3.7 (1.6), 1.6-13.4                                                   |
| Sleep fragmentation*                | 30.1 (8.9), 7.0-69.8                                                    | 29.1 (7.7), 9.8-59.1                                                    | 31.3 (10.1), 7.0-69.8                                                 |
| <b>Self-report, Sleep</b>           |                                                                         |                                                                         |                                                                       |
| PSQI Global Sleep Quality Index     | 5.8 (3.3), 0-18                                                         | 5.9 (3.5), 0-18                                                         | 5.7 (3.1), 0-16                                                       |

|                                          |             |             |             |
|------------------------------------------|-------------|-------------|-------------|
| PSQI Global Sleep Quality Index $\geq 6$ | 319 (45.6%) | 180 (47.6%) | 139 (43.2%) |
|------------------------------------------|-------------|-------------|-------------|

Abbreviations: PSQI=Pittsburgh Sleep Quality Index.[41]

†Missing data: 6 participants did not complete the questionnaire items pertaining to smoking or sleep. 41 participants do not have diet data, 95.1% because they participated in a protocol that did not collect these data and 4.9% for a miscellaneous reason. 124 participants do not have actigraphy data, 31.5% because they participated in a protocol that did not collect these data and 68.5% for a miscellaneous reason (e.g., did not wear monitor for sufficient length of time).

\*Definitions: For vegetables, the daily guideline of 2.5 cups was used for women based on a 2000 calorie diet and the daily guideline of 3.0 cups was used for men based on a 2400 calorie diet. For fruit, the daily guideline of 2.0 cups of fruit was used for both women and men as the recommendation for fruit does not differ between 2000 and 2400 calorie diets. For actigraphy for both activity and sleep indicators, a minimum wear time of 2 days and nights was required. Sleep efficiency is the number of minutes asleep divided by the number of minutes in bed. Sleep fragmentation is an index of restlessness during sleep derived from movement.

In summary, in descriptive analyses, findings to date revealed that the sample was well-educated and growing in their educational attainment as 13.6% were current students. Despite this, the sample showed considerable risk on health status indicators, especially related to obesity, hypertension, and diabetes. Of particular concern, the prevalence of hypertension and pre-diabetes and diabetes exceeded national estimates in similar-age individuals. The examination of health behavior indicators generally tracked with the parameters of poor health status, showing a pattern of poor diet, low activity, and disrupted sleep. The juxtaposition of the sample's relatively young age (26-31 years) and high educational status (55.6% college educated or greater) with its poor health status may suggest a dissociation between health and factors that are typically health protective. This is consistent with observed population health trends, which show a worsening of cardiometabolic health status in younger generations of Americans, especially among Millennials,[55] the generation to which the current sample (born in 1991) belongs.

## STRENGTHS AND LIMITATIONS

A primary strength of the current study, SHINE, was its leveraging of the original NICHD SECCYD to extend and maximize the value of this longitudinal birth cohort. The addition of adulthood measures of health allows innumerable opportunities for the pursuit of life course research relating early life environments to adulthood health and disease risk. Additional strengths include the gold standard methods that were used for the measurement of each health status and health behavior indicator. Extensive recruitment methods were also used to engage participants living in different locations throughout the US and adaptations to the study procedures were developed (e.g., 'self-administered' study protocol) to allow flexibility with participation. Taken together, these approaches balanced the standards of high-quality research with the imperative to reach participants in distant locations and to reduce barriers to participation, including during the challenging times of the COVID-19 pandemic.

There were also several limitations in the current study. Of the 1364 families that participated in the original NICHD SECCYD, only 927 (68.0%) adult children were available for inclusion in the current study based

1  
2  
3 on their prior consent to be re-contacted, as well as five having died. Of this number, 705 (76.1%) participated in  
4 the current SHINE study. Analyses showed retention in SHINE was predicted by higher maternal education at  
5 birth ( $b=.152, p<.001$ ), but not income-to-needs ratio at birth ( $b=-.007, p=.779$ ), with a 16% increase in the odds  
6 of retention among participants with more highly educated mothers. This pattern of greater educational  
7 attainment was also observed among the now adult children and will need to be considered when interpreting  
8 future study findings. Another pattern observed in the current study was that more women than men  
9 participated despite efforts to target men specifically. In addition, the nature of the study required that data  
10 collection teams work in the field to implement the study protocols. In this context, the numerous staff persons,  
11 distance from the participants, and varied data collection environments made oversight by the UW team an on-  
12 going challenge. A related issue concerns the remote protocols that by definition were administered with less  
13 oversight by the UW team. However, as described above, numerous training and quality assurance measures  
14 were implemented to ensure fidelity across all the study protocols. Finally, the data collection for the study  
15 occurred between 2018 and 2022, overlapping with the height of the COVID-19 pandemic. In addition to the  
16 challenges of conducting in-person research during the pandemic, the pandemic itself may have had differential  
17 impacts on participants who participated during this period and should also be considered when interpreting  
18 future study findings.  
19  
20  
21  
22  
23  
24  
25  
26  
27  
28  
29  
30

### 31 **FUTURE PLANS**

32  
33 The current study lays the groundwork for future analyses relating early life environments to adulthood  
34 health and disease risk. Within this broad framework, two specific areas of inquiry will be pursued initially. First,  
35 building on a large literature describing the graded relationship between socioeconomic status and health,[56-  
36 59] an in-depth examination is planned to delineate the specific features of educational attainment that are  
37 health protective. This objective stems from a National Institutes of Health (NIH) initiative to support research  
38 that 'further elucidates the pathways involved in the relationship between education and health outcomes and  
39 to identify the specific aspects and qualities of education that are responsible for this relationship'.[60] The  
40 current study is well positioned to contribute to this area by testing links between key aspects of education in  
41 early life, such as childhood academic skills and classroom experiences, and childhood health concurrently as  
42 well as adulthood health prospectively. In addition, this work will consider the potential moderating role of  
43 education in offsetting early childhood adversity experiences as well as other contributing factors such as high-  
44 quality childcare, parental education, and child intelligence and temperament.  
45  
46  
47  
48  
49  
50  
51  
52  
53  
54  
55  
56  
57  
58  
59  
60



1  
2  
3  
4  
5  
6  
7  
8  
9  
10  
11  
12  
13  
14  
15  
16  
17  
18  
19  
20  
21  
22  
23  
24  
25  
26  
27  
28  
29  
30  
31  
32  
33  
34  
35  
36  
37  
38  
39  
40  
41  
42  
43  
44  
45  
46  
47  
48  
49  
50  
51  
52  
53  
54  
55  
56  
57  
58  
59  
60

Second, building on a large literature examining early life adversity exposures and poor health,[9-14] an in-depth examination is planned that focuses on the potential mediating role of growth and pubertal development trajectories in accounting for early life adversity effects on adulthood cardiometabolic health.[61-63] This objective also stems from an NIH initiative to support research that identifies specific vulnerability factors and mechanisms by which early life adversity exposures transmit risk for poor health.[64] The current study is well positioned to contribute to this area by testing empirically the mechanistic role of pubertal development in a single longitudinal data set, thereby integrating previously separate literatures 1) relating early life adversity to earlier and faster rates of pubertal maturation[65-69] and 2) relating earlier pubertal maturation to poor cardiometabolic outcomes.[70-75] This work will also consider concurrent trajectories of prepubertal weight gain, relevant health behaviors, and resilience factors. For both main areas of inquiry, the many strengths of the original NICHD SECCYD and recent SHINE data collection will allow testing of these life course models with adequate accounting of covariates and alternative explanatory factors and will overcome common challenges present in these literatures, including long latency periods between the exposures and outcomes of interest as well as poor integration of relevant developmental and epidemiologic approaches.

## CONTEXT

The original NICHD SECCYD and recent SHINE data collection may be placed in the larger landscape of cohort studies around the globe. Great Britain initiated the first National Birth Cohort studies (1946, 1958, and 1970) followed more recently by the Avon Longitudinal Study of Parents and Children (ALSPAC, 1991) and the United Kingdom Millennium Cohort Study (MCS, 2000).[76] In the US, the National Longitudinal Surveys (NLSY, 1979, 1986, 1997) and the Early Childhood Longitudinal Study (ECLS, 1998) were launched later as were efforts such as the Minnesota Twin Family Study (MTFS, 1989) and the Adolescent Brain and Cognitive Development study (ABCD, 2015). Other notable cohort studies include the Dunedin Multidisciplinary Health and Development Study (Dunedin Study, 1979) in New Zealand and the Mater-University of Queensland Study of Pregnancy in Australia (MUSP, 1981).

Each of these studies, unique in time, place, and scope, reflects the value of the longitudinal cohort design in which causal inferences may be drawn between exposures and their impacts in areas of child health and development. On the other hand, common challenges emerge, including problems with selective attrition and sample representativeness, the maintenance of long-term funding, and the accommodation of new lines of research into the existing study.[76] In context, the NICHD SECCYD/SHINE follow-up is generally smaller in size compared to other cohorts and even at its inception was not population-based. Rather, recruitment parameters ensured participants represented the geographies of their respective locations including across urban and rural

1  
2  
3 settings. Additionally, problems with attrition have been experienced. In contrast, relative strengths of the  
4 NICHD SECCYD/SHINE follow-up include its depth of measurement, which is unique compared to other cohorts,  
5 including, for example, multi-method assessments of attachment, Tanner staging of pubertal development, and  
6 the current gold standard measures of health status and health behaviors.  
7  
8  
9

## 10 11 **COLLABORATION**

12 Data and materials from the NICHD SECCYD are available online[77]:  
13 [icpsr.umich.edu/web/ICPSR/series/233](http://icpsr.umich.edu/web/ICPSR/series/233). Researchers interested in working with the team of investigators who  
14 led the SHINE follow-up data collection are invited to contact MEB and GIR. Potential collaborative efforts will be  
15 considered under specific conditions, including, but not limited to, the proposed scope of work and assurances  
16 related to data security and integrity.  
17  
18  
19  
20  
21  
22

## 23 **CONCLUSIONS**

24 The landmark NICHD SECCYD, as described above, is a unique resource that has supported research in  
25 diverse areas of child health and well-being since its inception in 1991. With the addition of the follow-up data  
26 collection—SHINE, through which the health status of the now adult participants has been characterized, new  
27 opportunities to test life course models linking early life environments to adulthood health and disease risk have  
28 emerged. These opportunities are timely given the wealth of evidence suggesting the origins of adulthood  
29 health begin in childhood as well as the growing imperative to move toward prevention focused efforts to  
30 reverse worsening US population health trends. The initial examination of these newly available data reveals a  
31 distinct pattern of poor health, especially relating to obesity, hypertension, and diabetes. This pattern was  
32 observed despite the relatively young age and high educational status of the sample but is consistent with  
33 findings suggesting the health of younger generations of Americans is worsening, as evidenced by comparisons  
34 to the health of their same-age counterparts from older generations. With the adulthood health measures now  
35 in place, the next steps for this work will entail leveraging the uniquely robust measures collected as a part of  
36 the original NICHD SECCYD to pinpoint specific early life risk and resilience factors as well as the correlates and  
37 potential mechanisms accounting for variability in trajectories of health and disease risk in the period of young  
38 adulthood. In addition, the work of the current study is discussed with an emphasis on lessons that were learned  
39 conducting in-person, health focused research among participants living in distant locations throughout the US  
40 and in a period overlapping with the COVID-19 pandemic.  
41  
42  
43  
44  
45  
46  
47  
48  
49  
50  
51  
52  
53  
54  
55  
56  
57  
58  
59  
60

1  
2  
3 **Contributors:** MEB led the conceptualization and writing of this manuscript with assistance with data cleaning  
4 and analysis from AST and WSY. MEB, GIR, SEG, BMA, RAH, RCP, ALM, GMS, AST, WSY, CBL participated in the  
5 execution of the SHINE data collection and all authors collaborated on the conceptualization, writing, and critical  
6 review of this manuscript.  
7  
8  
9

10 **Funding:** This work was supported by the *Eunice Kennedy Shriver* National Institute of Child Health and Human  
11 Development (U10HD025447, R01HD091132) and the National Heart, Lung, and Blood Institute (R01HL130103)  
12 at the National Institutes of Health.  
13

14 **Competing Interests:** None declared.  
15  
16  
17  
18  
19  
20  
21  
22  
23  
24  
25  
26  
27  
28  
29  
30  
31  
32  
33  
34  
35  
36  
37  
38  
39  
40  
41  
42  
43  
44  
45  
46  
47  
48  
49  
50  
51  
52  
53  
54  
55  
56  
57  
58  
59  
60

For peer review only

**Acknowledgements:**

We would like to recognize the important contributions of the large investigative team dedicated to the high-quality data collection of the SECCYD follow-up, SHINE. In addition to the lead investigators and co-investigators identified as co-authors, the internal UW research team included Rebecca Christopf, Madalyn Osbourne, Hailey Hagins, and Linda Nzabamwita. The in-field data collectors and phlebotomists included Damara Acosta, Taylor Haase, Connie Showalter, Mary Koller, Khamia Powell, Rochelle Eskridge, Megan Buss, Kay Harrington, Amanda O'Brien, Angie Mondestin, Leah Welker, Karen Nowden, Emily Goodrum, Tracey Pinkney, Libby Shook, Kelsey Smith, Danielle Heusted, and Kristen Roynesdal. The laboratory work was conducted by the UW Research Testing Services; the UW School of Nursing Biobehavioral Lab Testing and Education Core (Ernie Tolentino); the UVA Center for Research in Reproduction Ligand Assay and Analysis Core, supported by NIH/NICHD R24 HD102061; and the UW Center for Studies in Demography & Ecology (Eleanor Brindle, Melanie Martin, Carmen Hove, and Maia Kent), supported by NIH/NICHD P2C HD042828. Questionnaire administration was conducted using REDCap, supported by the UW Institute of Translational Health Sciences, NIH/NCATS UL1 TR002319. Additional support was provided to George Slavich (#OPR21101) from the California Governor's Office of Planning and Research/California Initiative to Advance Precision Medicine.

**Patient and public involvement:** None.

**Patient consent for publication:** Not required.

**Ethics approval:** Informed consent for the NICHD SECCYD follow-up study, SHINE, was obtained from the target participants. The research was approved by the Human Subjects Division of the University of Washington (STUDY00001821).

**Provenance and peer review:** Not commissioned; externally peer reviewed.

**Data availability statement:** Data and materials from the NICHD SECCYD are available online: [icpsr.umich.edu/web/ICPSR/series/233](http://icpsr.umich.edu/web/ICPSR/series/233). Researchers interested in working with the team of investigators who led the SHINE follow-up data collection are invited to contact MEB and GIR. Potential collaborative efforts will be considered under specific conditions, including, but not limited to, the proposed scope of work and assurances related to data security and integrity.

**Open access:** This is an open access article distributed in accordance with the Creative Commons Attribution Non Commercial (CC BY-NC 4.0) license, which permits others to distribute, remix, adapt, build upon this work non-commercially, and license their derivative works on different terms, provided the original work is properly cited, appropriate credit is given, any changes made indicated, and the use is non-commercial. See: <http://creativecommons.org/licenses/by-nc/4.0/>.

## REFERENCES

1. NICHD Early Child Care Research Network. *Child care and child development: Results from The NICHD Study of Early Child Care and Youth Development*. 2005: Guilford Press.
2. NICHD Early Child Care Research Network. *The effects of infant child care on infant-mother attachment security: Results of the NICHD Study of Early Child Care*. *Child Dev*, 1997. **68**(5): p. 860-879.
3. NICHD Early Child Care Research Network. *Early child care and children's development prior to school entry: Results from the NICHD Study of Early Child Care*. *Am Educ Res J*, 2002. **39**(1): p. 133-164.
4. NICHD Early Child Care Research Network. *Early child care and children's development in the primary grades: Results from the NICHD Study of Early Child Care*. *Am Educ Res J*, 2005. **43**: p. 537-570.
5. Belsky, J., et al., *Are there long-term effects of early child care?* *Child Dev*, 2007. **78**(2): p. 681-701.
6. Vandell, D.L., et al., *Do effects of early child care extend to age 15 years? Results from The NICHD Study of Early Child Care and Youth Development*. *Child Dev*, 2010. **81**(3): p. 737-56.
7. Dagan, O., et al., *Does secure base script knowledge mediate associations between observed parental caregiving during childhood and adult romantic relationship quality and health?* *Attach Hum Dev*, 2021. **23**(5): p. 643-664.
8. Kunkel, J.J., et al., *Early maternal sensitivity and markers of physical health: Enduring or transient associations from childhood to adulthood?* *Dev Psychol*, 2022. **58**(12): p. 2252-2263.
9. Suglia, S.F., et al., *Childhood and adolescent adversity and cardiometabolic outcomes: A Scientific Statement from the American Heart Association*. *Circulation*, 2018. **137**(5): p. e15-e28.
10. Suglia, S.F., et al., *Social determinants of cardiovascular health: Early life adversity as a contributor to disparities in cardiovascular diseases*. *The Journal of Pediatrics*, 2020.
11. Suglia, S.F., et al., *Timing, duration, and differential susceptibility to early life adversities and cardiovascular disease risk across the lifespan: Implications for future research*. *Prev Med*, 2021. **153**: p. 106736.
12. Berens, A.E., S.K.G. Jensen, and C.A. Nelson, *Biological embedding of childhood adversity: From physiological mechanisms to clinical implications*. *BMC Med*, 2017. **15**(1): p. 135.
13. Shonkoff, J.P. and A.S. Garner, *The lifelong effects of early childhood adversity and toxic stress*. *Pediatrics*, 2012. **129**(1): p. e232-46.
14. Su, S., et al., *The role of adverse childhood experiences in cardiovascular disease risk: A review with emphasis on plausible mechanisms*. *Curr Cardiol Rep*, 2015. **17**(10): p. 88.
15. Galobardes, B., J.W. Lynch, and G.D. Smith, *Childhood socioeconomic circumstances and cause-specific mortality in adulthood: Systematic review and interpretation*. *Epidemiologic Reviews*, 2004. **26**: p. 7-21.

16. Galobardes, B., J.W. Lynch, and G.D. Smith, *Is the association between childhood socioeconomic circumstances and cause-specific mortality established? Update of a systematic review*. Journal of Epidemiology and Community Health, 2008. **62**(5): p. 387-390.
17. Galobardes, B., G.D. Smith, and J.W. Lynch, *Systematic review of the influence of childhood socioeconomic circumstances on risk for cardiovascular disease in adulthood*. Annals of Epidemiology, 2006. **16**(2): p. 91-104.
18. Midei, A.J. and K.A. Matthews, *Interpersonal violence in childhood as a risk factor for obesity: a systematic review of the literature and proposed pathways*. Obesity Reviews, 2011. **12**(501): p. e159-e172.
19. Midei, A.J., et al., *Childhood physical abuse is associated with incident metabolic syndrome in mid-life women*. Health Psychology, 2013. **32**(2): p. 121-127.
20. Wegman, H.L. and C. Stetler, *A meta-analytic review of the effects of childhood abuse on medical outcomes in adulthood*. Psychosomatic Medicine, 2009. **71**(8): p. 805-812.
21. Johnson, W.F., et al., *Childhood abuse and neglect and physical health at midlife: Prospective, longitudinal evidence*. Dev Psychopathol, 2017. **29**(5): p. 1935-1946.
22. Farrell, A.K., et al., *Early maternal sensitivity, attachment security in young adulthood, and cardiometabolic risk at midlife*. Attach Hum Dev, 2019. **21**(1): p. 70-86.
23. Young, E.S., et al., *The dual impact of early and concurrent life stress on adults' diurnal cortisol patterns: A prospective study*. Psychological Science, 2019. **30**(5): p. 739-747.
24. Young, E.S., et al., *Life stress and cortisol reactivity: An exploratory analysis of the effects of stress exposure across life on HPA-axis functioning*. Dev Psychopathol, 2021. **33**(1): p. 301-312.
25. Anderson, G.F., et al., *Health spending and outcomes: Trends in OECD countries, 1960-1998*. Health Affairs, 2000. **19**(3): p. 150-157.
26. Anderson, G.F., et al., *It's the prices, stupid: Why the United States is so different from other countries*. Health Affairs, 2003. **22**(3): p. 89-105.
27. Papanicolas, I., L.R. Woskie, and A.K. Jha, *Health care spending in the United States and other high-income countries*. Jama-Journal of the American Medical Association, 2018. **319**(10): p. 1024-1039.
28. Carey, V.J., et al., *Body fat distribution and risk of non-insulin-dependent diabetes mellitus in women - The Nurses' Health Study*. American Journal of Epidemiology, 1997. **145**(7): p. 614-619.
29. Janssen, I., P.T. Katzmarzyk, and R. Ross, *Body mass index, waist circumference, and health risk*. Archives of Internal Medicine, 2002. **162**(18): p. 2074-2079.

- 1  
2  
3 30. Lapidus, L., et al., *Distribution of adipose tissue and risk of cardiovascular disease and death: A 12-year*  
4 *follow-up of participants in the Population Study of Women in Gothenburg, Sweden*. British Medical  
5 Journal, 1984. **289**(6454): p. 1257-1261.  
6  
7  
8 31. Dieleman, J.L., et al., *US spending on personal health care and public health, 1996-2013*. Jama-Journal of  
9 the American Medical Association, 2016. **316**(24): p. 2627-2646.  
10  
11 32. Martin, A.B., et al., *National health spending: Faster growth In 2015 as coverage expands and utilization*  
12 *increases*. Health Affairs, 2017. **36**(1): p. 166-176.  
13  
14 33. Booth-LaForce, C., et al., *Caregiving and contextual sources of continuity and change in attachment*  
15 *security from infancy to late adolescence*. Monogr Soc Res Child Dev, 2014. **79**(3): p. 67-84.  
16  
17 34. Ansari, A., T.L. Hofkens, and R.C. Pianta, *Absenteeism in the first decade of education forecasts civic*  
18 *engagement and educational and socioeconomic prospects in young adulthood*. J Youth Adolesc, 2020.  
19 **49**(9): p. 1835-1848.  
20  
21 35. Nivison, M.D., et al., *Convergent and discriminant validity of retrospective assessments of the quality of*  
22 *childhood parenting: prospective evidence From infancy to Age 26 years*. Psychol Sci, 2021. **32**(5): p. 721-  
23 734.  
24  
25 36. Bustamante, A.S., et al., *Adult outcomes of sustained high-quality early child care and education: Do they*  
26 *vary by family income?* Child Dev, 2022. **93**(2): p. 502-523.  
27  
28 37. *University of Washington Policies, Procedures, and Guidance. Guidance on Human Subjects Regulations.*  
29 <https://www.washington.edu/research/policies/guidance-human-subjects-regulations-2/>. [cited 2022].  
30  
31 38. *National Cancer Institute, Division of Cancer Control & Population Sciences, Automated Self-Administered*  
32 *24-Hour (ASA24) Dietary Assessment Tool*. Available: <https://epi.grants.cancer.gov/asa24> [Accessed July  
33 2022].  
34  
35 39. *US Department of Agriculture, Food and Nutrition Service, Healthy Eating Index*. Available:  
36 <https://www.fns.usda.gov/healthy-eating-index-hei> [Accessed July 2022].  
37  
38 40. *The Dietary Screener Questionnaire (DSQ) in the NHANES 2009-10: Data Processing and Scoring Procedure*  
39 *for Earlier methods*. Epidemiology and Genomics Research Program. National Cancer Institute.  
40 <https://epi.grants.cancer.gov/diet/screeners/files>. Updated April 2, 2019. .  
41  
42 41. Buysse, D.J., et al., *The Pittsburgh Sleep Quality Index: a new instrument for psychiatric practice and*  
43 *research*. Psychiatry Res, 1989. **28**(2): p. 193-213.  
44  
45 42. Cohen, S., T. Kamarck, and R. Mermelstein, *A global measure of perceived stress*. J Health Soc Behav, 1983.  
46 **24**(4): p. 385-96.  
47  
48  
49  
50  
51  
52  
53  
54  
55  
56  
57  
58  
59  
60

- 1  
2  
3 43. Slavich, G.M. and G.S. Shields, *Assessing Lifetime Stress Exposure Using the Stress and Adversity Inventory for Adults (Adult STRAIN): An Overview and Initial Validation*. *Psychosom Med*, 2018. **80**(1): p. 17-27.
- 4  
5  
6 44. Radloff, L.S., *The CES-D Scale: A self-report depression scale for research in the general population*. *Applied Psychological Measurement Vol 1*(3) Sum 1977, 385-401, 1977.
- 7  
8  
9  
10 45. Achenbach, T.M. and L.A. Rescorla, *Manual for the ASEBA Adult Forms & Profiles*. Research Center for Children, Youth, & Families. 2003, Burlington, VT, USA: University of Vermont.
- 11  
12  
13 46. Spanier, G.B., *Measuring dyadic adjustment: New scales for assessing the quality of marriage and similar dyads*. *Journal of Marriage and the Family*, 1976. **38**(1): p. 15-28.
- 14  
15  
16 47. Fraley, R.C., et al., *The Experiences in Close Relationships-Relationship Structures questionnaire: a method for assessing attachment orientations across relationships*. *Psychol Assess*, 2011. **23**(3): p. 615-25.
- 17  
18  
19 48. U.S. Census Bureau. *Educational Attainment in the United States: 2019. Table 3. Detailed Years of School Completed by People 25 Years and Over by Sex, Age Groups, Race and Hispanic Origin: 2019*. Available: <https://www.census.gov/content/census/en/data/tables/2019/demo/educational-attainment/cps-detailed-tables.html> [Accessed July 2022].
- 20  
21  
22  
23  
24  
25  
26 49. National Center for Health Statistics, *National Health Interview Survey, Prevalence of obesity among adults aged 20 and over, by age group and sex: United States, 2018*. Available: [https://public.tableau.com/app/profile/nhis/viz/FIGURE6\\_2/Dashboard6\\_2](https://public.tableau.com/app/profile/nhis/viz/FIGURE6_2/Dashboard6_2) [Accessed July 2022].
- 27  
28  
29  
30  
31 50. National Health and Nutrition Examination Survey 2017–March 2020 Prepandemic Data Files Development of Files and Prevalence Estimates for Selected Health Outcomes, S. National Center for Health, Editor. 2021, <http://dx.doi.org/10.15620/cdc:106273>: Hyattsville, MD.
- 32  
33  
34  
35  
36 51. National Center for Health Statistics, *National Health and Nutrition Examination Survey, 2017-2018*, Available: [https://www.cdc.gov/nchs/about/factsheets/factsheet\\_nhanes.htm](https://www.cdc.gov/nchs/about/factsheets/factsheet_nhanes.htm) [Accessed July 2022].
- 37  
38  
39  
40 52. Centers for Disease Control and Prevention. *National Diabetes Statistics Report, 2020*. Atlanta, GA, Available: <https://www.cdc.gov/diabetes/pdfs/data/statistics/national-diabetes-statistics-report.pdf> [Accessed July 2022].
- 41  
42  
43  
44  
45 53. Cornelius, M.E., et al., *Tobacco product use among adults - United States, 2020*. *MMWR Morb Mortal Wkly Rep*, 2022. **71**(11): p. 397-405.
- 46  
47  
48 54. Lee, S.H., et al., *Adults meeting fruit and vegetable intake recommendations - United States, 2019*. *MMWR Morb Mortal Wkly Rep*, 2022. **71**(1): p. 1-9.
- 49  
50  
51  
52 55. BlueCross BlueShield *The Health Of America, The Health of Millennials, April 24, 2019, A Focus on Millennial Health Trends*. Available: [https://www.bcbs.com/sites/default/files/file-attachments/health-of-america-report/HOA-Millennial\\_Health\\_0.pdf](https://www.bcbs.com/sites/default/files/file-attachments/health-of-america-report/HOA-Millennial_Health_0.pdf) [Accessed July 2022].
- 53  
54  
55  
56  
57



- 1  
2  
3 56. Adler, N.E., et al., *Socioeconomic status and health. The challenge of the gradient*. Am Psychol, 1994. **49**(1):  
4 p. 15-24.  
5  
6 57. Adler, N.E. and A.C. Snibbe, *The role of psychosocial processes in explaining the gradient between*  
7 *socioeconomic status and health*. Current Directions in Psychological Science, 2003. **12**(4): p. 119-123.  
8  
9 58. Marmot, M., *Social determinants of health inequalities*. Lancet, 2005. **365**(9464): p. 1099-104.  
10  
11 59. Marmot, M.G., et al., *Health inequalities among British civil servants: the Whitehall II study*. Lancet, 1991.  
12 **337**(8754): p. 1387-93.  
13  
14 60. *National Institutes of Health (NIH), Pathways Linking Education to Health*. Available:  
15 <https://grants.nih.gov/grants/guide/rfa-files/RFA-OB-03-001.html> [Accessed July 2022].  
16  
17 61. Bleil, M.E., et al., *Childhood adversity and pubertal timing: Understanding the origins of adulthood*  
18 *cardiovascular risk*. Biol Psychol, 2013. **93**(1): p. 213-9.  
19  
20 62. Bleil, M.E., et al., *Patterns of early life weight gain and female onset of puberty*. J Endocr Soc, 2021. **5**(12):  
21 p. bvab165.  
22  
23 63. Bleil, M.E., et al., *Early life adversity and pubertal timing: Implications for cardiometabolic health*. J Pediatr  
24 Psychol, 2021. **46**(1): p. 36-48.  
25  
26 64. *National Institutes of Health (NIH), Pathways and Mechanisms Linking Early Life Adversities (ELAs) and*  
27 *Adulthood Health Outcomes*. Available: [https://www.nia.nih.gov/research/dbsr/pathways-and-](https://www.nia.nih.gov/research/dbsr/pathways-and-mechanisms-linking-early-life-adversities-elas-and-adult-health-outcomes)  
28 [mechanisms-linking-early-life-adversities-elas-and-adult-health-outcomes](https://www.nia.nih.gov/research/dbsr/pathways-and-mechanisms-linking-early-life-adversities-elas-and-adult-health-outcomes) [Accessed July 2022].  
29  
30 65. Hamlat, E.J., et al., *Effects of early life adversity on pubertal timing and tempo in black and white girls: The*  
31 *National Growth and Health Study*. Psychosom Med, 2022. **84**(3): p. 297-305.  
32  
33 66. Belsky, J., R.M. Houts, and R.M.P. Fearon, *Infant attachment security and the timing of puberty: Testing*  
34 *an evolutionary hypothesis*. Psychological Science, 2010. **21**(9): p. 1195-1201.  
35  
36 67. Belsky, J., et al., *Family rearing antecedents of pubertal timing*. Child Development, 2007. **78**(4): p. 1302-  
37 1321.  
38  
39 68. Deardorff, J., et al., *Socioeconomic status and age at menarche: an examination of multiple indicators in*  
40 *an ethnically diverse cohort*. Annals of Epidemiology, 2014. **24**(10): p. 727-733.  
41  
42 69. Hiatt, R.A., et al., *Childhood socioeconomic position and pubertal onset in a cohort of multiethnic girls:*  
43 *Implications for breast cancer*. Cancer Epidemiology Biomarkers & Prevention, 2017. **26**(12): p. 1714-1721.  
44  
45 70. Frontini, M.G., S.R. Srinivasan, and G.S. Berenson, *Longitudinal changes in risk variables underlying*  
46 *metabolic syndrome X from childhood to young adulthood in female subjects with a history of early*  
47 *menarche: The Bogalusa Heart Study*. International Journal of Obesity, 2003. **27**(11): p. 1398-1404.  
48  
49  
50  
51  
52  
53  
54  
55  
56  
57  
58  
59  
60

- 1  
2  
3 71. He, C.Y., et al., *Age at menarche and risk of type 2 diabetes: Results from 2 large prospective cohort studies*.  
4 American Journal of Epidemiology, 2010. **171**(3): p. 334-344.  
5  
6 72. Jacobsen, B.K., I. Heuch, and G. Kvale, *Association of low age at menarche with increased all-cause*  
7 *mortality: A 37-year follow-up of 61,319 Norwegian women*. American Journal of Epidemiology, 2007.  
8 **166**(12): p. 1431-1437.  
9  
10 73. Jacobsen, B.K., et al., *Age at menarche, total mortality and mortality from ischaemic heart disease and*  
11 *stroke: The Adventist Health Study, 1976-88*. International Journal of Epidemiology, 2009. **38**(1): p. 245-  
12 252.  
13  
14 74. Remsberg, K.E., et al., *Early menarche and the development of cardiovascular disease risk factors in*  
15 *adolescent girls: The Fels Longitudinal Study*. Journal of Clinical Endocrinology & Metabolism, 2005. **90**(5):  
16 p. 2718-2724.  
17  
18 75. Widen, E., et al., *Pubertal timing and growth influences cardiometabolic risk factors in adult males and*  
19 *females*. Diabetes Care, 2012. **35**(4): p. 850-856.  
20  
21 76. Pirus, C. and H. Leridon, *Large child cohort studies across the world*. Population, 2010. **65**(4): p. 575-629.  
22  
23 [dataset] 77. *The Inter-University Consortium for Political and Social Research (ICPSR). NICHD Study of Early*  
24 *Child Care and Youth Development (SECCYD) Series*. <https://www.icpsr.umich.edu/web/ICPSR/series/233>.  
25 [cited 2022].  
26  
27  
28  
29  
30  
31  
32  
33  
34  
35  
36  
37  
38  
39  
40  
41  
42  
43  
44  
45  
46  
47  
48  
49  
50  
51  
52  
53  
54  
55  
56  
57  
58  
59  
60

1  
2  
3 **Figure caption:**  
4

5 Figure 1. Description of the data collections in the SECCYD (repeated assessments between birth and age 15.5)  
6 and SHINE (single assessment in young adulthood), as well as single follow-up assessments at ages 17-18, 22,  
7 and 26-27 years.  
8  
9  
10  
11  
12  
13  
14  
15  
16  
17  
18  
19  
20  
21  
22  
23  
24  
25  
26  
27  
28  
29  
30  
31  
32  
33  
34  
35  
36  
37  
38  
39  
40  
41  
42  
43  
44  
45  
46  
47  
48  
49  
50  
51  
52  
53  
54  
55  
56  
57  
58  
59  
60

For peer review only

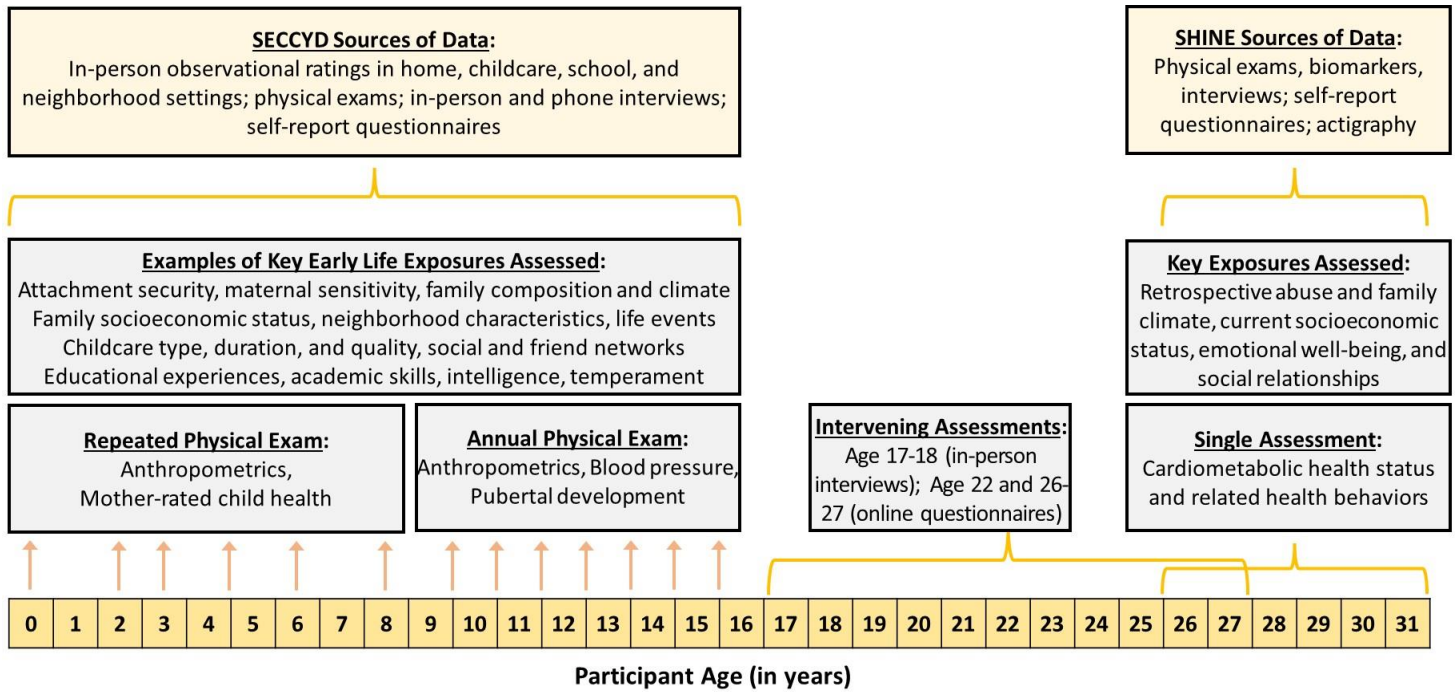

Figure 1. Description of the data collections in the SECCYD (repeated assessments between birth and age 15.5) and SHINE (single assessment in young adulthood), as well as single follow-up assessments at ages 17-18, 22, and 26-27 years.

STROBE Statement—Checklist of items that should be included in reports of *cohort studies*

|                           | Item No | Recommendation                                                                                                                                                                       |                                        |
|---------------------------|---------|--------------------------------------------------------------------------------------------------------------------------------------------------------------------------------------|----------------------------------------|
| <b>Title and abstract</b> | 1       | (a) Indicate the study's design with a commonly used term in the title or the abstract                                                                                               | Page 1                                 |
|                           |         | (b) Provide in the abstract an informative and balanced summary of what was done and what was found                                                                                  | Page 3                                 |
| <b>Introduction</b>       |         |                                                                                                                                                                                      |                                        |
| Background/rationale      | 2       | Explain the scientific background and rationale for the investigation being reported                                                                                                 | Pages 5-6                              |
| Objectives                | 3       | State specific objectives, including any prespecified hypotheses                                                                                                                     | Page 6                                 |
| <b>Methods</b>            |         |                                                                                                                                                                                      |                                        |
| Study design              | 4       | Present key elements of study design early in the paper                                                                                                                              | Pages 6-7                              |
| Setting                   | 5       | Describe the setting, locations, and relevant dates, including periods of recruitment, exposure, follow-up, and data collection                                                      | Pages 6-7                              |
| Participants              | 6       | (a) Give the eligibility criteria, and the sources and methods of selection of participants. Describe methods of follow-up                                                           | Pages 6-7, Pages 8-9                   |
|                           |         | (b) For matched studies, give matching criteria and number of exposed and unexposed                                                                                                  | n/a                                    |
| Variables                 | 7       | Clearly define all outcomes, exposures, predictors, potential confounders, and effect modifiers. Give diagnostic criteria, if applicable                                             | Pages 12-14                            |
| Data sources/ measurement | 8*      | For each variable of interest, give sources of data and details of methods of assessment (measurement). Describe comparability of assessment methods if there is more than one group | Pages 12-14                            |
| Bias                      | 9       | Describe any efforts to address potential sources of bias                                                                                                                            | Pages 9-10                             |
| Study size                | 10      | Explain how the study size was arrived at                                                                                                                                            | Page 6                                 |
| Quantitative variables    | 11      | Explain how quantitative variables were handled in the analyses. If applicable, describe which groupings were chosen and why                                                         | Pages 16-21                            |
| Statistical methods       | 12      | (a) Describe all statistical methods, including those used to control for confounding                                                                                                | n/a, current paper is a Cohort Profile |
|                           |         | (b) Describe any methods used to examine subgroups and interactions                                                                                                                  | n/a                                    |
|                           |         | (c) Explain how missing data were addressed                                                                                                                                          | This is noted in Tables.               |
|                           |         | (d) If applicable, explain how loss to follow-up was addressed                                                                                                                       | Attrition, page 8                      |
|                           |         | (e) Describe any sensitivity analyses                                                                                                                                                | n/a, current paper is a Cohort Profile |
| <b>Results</b>            |         |                                                                                                                                                                                      |                                        |
| Participants              | 13*     | (a) Report numbers of individuals at each stage of study—eg numbers potentially eligible, examined for eligibility,                                                                  | n/a, current paper is a                |

|                          |     |                                                                                                                                                                                                              |                                                                 |
|--------------------------|-----|--------------------------------------------------------------------------------------------------------------------------------------------------------------------------------------------------------------|-----------------------------------------------------------------|
|                          |     | confirmed eligible, included in the study, completing follow-up, and analysed                                                                                                                                | Cohort Profile,<br>Participation rates, pg 8                    |
|                          |     | (b) Give reasons for non-participation at each stage                                                                                                                                                         | n/a                                                             |
|                          |     | (c) Consider use of a flow diagram                                                                                                                                                                           | n/a                                                             |
| Descriptive data         | 14* | (a) Give characteristics of study participants (eg demographic, clinical, social) and information on exposures and potential confounders                                                                     | Page 8                                                          |
|                          |     | (b) Indicate number of participants with missing data for each variable of interest                                                                                                                          | This is noted in Tables.                                        |
|                          |     | (c) Summarise follow-up time (eg, average and total amount)                                                                                                                                                  | Figure 1                                                        |
| Outcome data             | 15* | Report numbers of outcome events or summary measures over time                                                                                                                                               | Pages 16-21                                                     |
| Main results             | 16  | (a) Give unadjusted estimates and, if applicable, confounder-adjusted estimates and their precision (eg, 95% confidence interval). Make clear which confounders were adjusted for and why they were included | Descriptive results only because is a Cohort Profile, pgs 16-21 |
|                          |     | (b) Report category boundaries when continuous variables were categorized                                                                                                                                    | Page 18 and Tables                                              |
|                          |     | (c) If relevant, consider translating estimates of relative risk into absolute risk for a meaningful time period                                                                                             | n/a                                                             |
| Other analyses           | 17  | Report other analyses done—eg analyses of subgroups and interactions, and sensitivity analyses                                                                                                               | n/a                                                             |
| <b>Discussion</b>        |     |                                                                                                                                                                                                              |                                                                 |
| Key results              | 18  | Summarise key results with reference to study objectives                                                                                                                                                     | Pages 21-24                                                     |
| Limitations              | 19  | Discuss limitations of the study, taking into account sources of potential bias or imprecision. Discuss both direction and magnitude of any potential bias                                                   | Pages 21-22                                                     |
| Interpretation           | 20  | Give a cautious overall interpretation of results considering objectives, limitations, multiplicity of analyses, results from similar studies, and other relevant evidence                                   | Page 24                                                         |
| Generalisability         | 21  | Discuss the generalisability (external validity) of the study results                                                                                                                                        | Pages 21-24                                                     |
| <b>Other information</b> |     |                                                                                                                                                                                                              |                                                                 |
| Funding                  | 22  | Give the source of funding and the role of the funders for the present study and, if applicable, for the original study on which the present article is based                                                | Page 25                                                         |

\*Give information separately for exposed and unexposed groups.

**Note:** An Explanation and Elaboration article discusses each checklist item and gives methodological background and published examples of transparent reporting. The STROBE checklist is best used in conjunction with this article (freely available on the Web sites of PLoS Medicine at <http://www.plosmedicine.org/>, Annals of Internal Medicine at <http://www.annals.org/>, and Epidemiology at <http://www.epidem.com/>). Information on the STROBE Initiative is available at <http://www.strobe-statement.org>.

# BMJ Open

## Cohort Profile: A 30-Year Follow-up of the NICHD Study of Early Child Care and Youth Development (SECCYD), the Challenges and Triumphs of Conducting In-Person Research at a Distance

|                                 |                                                                                                                                                                                                                                                                                                                                                                                                                                                                                                                                                                                                                                                                                                                                                                                                                                                                                                                                                                                                                                                                              |
|---------------------------------|------------------------------------------------------------------------------------------------------------------------------------------------------------------------------------------------------------------------------------------------------------------------------------------------------------------------------------------------------------------------------------------------------------------------------------------------------------------------------------------------------------------------------------------------------------------------------------------------------------------------------------------------------------------------------------------------------------------------------------------------------------------------------------------------------------------------------------------------------------------------------------------------------------------------------------------------------------------------------------------------------------------------------------------------------------------------------|
| Journal:                        | <i>BMJ Open</i>                                                                                                                                                                                                                                                                                                                                                                                                                                                                                                                                                                                                                                                                                                                                                                                                                                                                                                                                                                                                                                                              |
| Manuscript ID                   | bmjopen-2022-066655.R2                                                                                                                                                                                                                                                                                                                                                                                                                                                                                                                                                                                                                                                                                                                                                                                                                                                                                                                                                                                                                                                       |
| Article Type:                   | Cohort profile                                                                                                                                                                                                                                                                                                                                                                                                                                                                                                                                                                                                                                                                                                                                                                                                                                                                                                                                                                                                                                                               |
| Date Submitted by the Author:   | 16-Feb-2023                                                                                                                                                                                                                                                                                                                                                                                                                                                                                                                                                                                                                                                                                                                                                                                                                                                                                                                                                                                                                                                                  |
| Complete List of Authors:       | Bleil, Maria E; University of Washington, Department of Child, Family, & Population Health Nursing<br>Roisman, Glenn; University of Minnesota Twin Cities, Institute of Child Development<br>Gregorich, Steven; University of California San Francisco, School of Medicine<br>Appelhans, Bradley; Rush University Medical Center, Department of Preventive Medicine<br>Hiatt, Robert; University of California San Francisco, Department of Epidemiology and Biostatistics<br>Pianta, Robert; University of Virginia, School of Education and Human Development<br>Marsland, Anna; University of Pittsburgh, Department of Psychology<br>Slavich, George; University of California Los Angeles, Department of Psychiatry and Biobehavioral Sciences<br>Thomas, Alexis; University of Washington, Department of Child, Family, & Population Health Nursing<br>Yeung, Winnie; University of Washington, Department of Child, Family, & Population Health Nursing<br>Booth-LaForce, Cathryn; University of Washington, Department of Child, Family, & Population Health Nursing |
| <b>Primary Subject Heading</b>: | Epidemiology                                                                                                                                                                                                                                                                                                                                                                                                                                                                                                                                                                                                                                                                                                                                                                                                                                                                                                                                                                                                                                                                 |
| Secondary Subject Heading:      | Cardiovascular medicine, Diabetes and endocrinology, Public health, Research methods, Nutrition and metabolism                                                                                                                                                                                                                                                                                                                                                                                                                                                                                                                                                                                                                                                                                                                                                                                                                                                                                                                                                               |
| Keywords:                       | EPIDEMIOLOGY, MENTAL HEALTH, PREVENTIVE MEDICINE, PUBLIC HEALTH, SOCIAL MEDICINE, CARDIOLOGY                                                                                                                                                                                                                                                                                                                                                                                                                                                                                                                                                                                                                                                                                                                                                                                                                                                                                                                                                                                 |
|                                 |                                                                                                                                                                                                                                                                                                                                                                                                                                                                                                                                                                                                                                                                                                                                                                                                                                                                                                                                                                                                                                                                              |

SCHOLARONE™  
Manuscripts

1  
2  
3  
4  
5  
6  
7  
8  
9  
10  
11  
12  
13  
14  
15  
16  
17  
18  
19  
20  
21  
22  
23  
24  
25  
26  
27  
28  
29  
30  
31  
32  
33  
34  
35  
36  
37  
38  
39  
40  
41  
42  
43  
44  
45  
46  
47  
48  
49  
50  
51  
52  
53  
54  
55  
56  
57  
58  
59  
60





I, the Submitting Author has the right to grant and does grant on behalf of all authors of the Work (as defined in the below author licence), an exclusive licence and/or a non-exclusive licence for contributions from authors who are: i) UK Crown employees; ii) where BMJ has agreed a CC-BY licence shall apply, and/or iii) in accordance with the terms applicable for US Federal Government officers or employees acting as part of their official duties; on a worldwide, perpetual, irrevocable, royalty-free basis to BMJ Publishing Group Ltd ("BMJ") its licensees and where the relevant Journal is co-owned by BMJ to the co-owners of the Journal, to publish the Work in this journal and any other BMJ products and to exploit all rights, as set out in our [licence](#).

The Submitting Author accepts and understands that any supply made under these terms is made by BMJ to the Submitting Author unless you are acting as an employee on behalf of your employer or a postgraduate student of an affiliated institution which is paying any applicable article publishing charge ("APC") for Open Access articles. Where the Submitting Author wishes to make the Work available on an Open Access basis (and intends to pay the relevant APC), the terms of reuse of such Open Access shall be governed by a Creative Commons licence – details of these licences and which [Creative Commons](#) licence will apply to this Work are set out in our licence referred to above.

Other than as permitted in any relevant BMJ Author's Self Archiving Policies, I confirm this Work has not been accepted for publication elsewhere, is not being considered for publication elsewhere and does not duplicate material already published. I confirm all authors consent to publication of this Work and authorise the granting of this licence.

1  
2  
3 **Cohort Profile: A 30-Year Follow-up of the NICHD Study of Early Child Care and Youth Development (SECCYD),**  
4 **the Challenges and Triumphs of Conducting In-Person Research at a Distance**  
5  
6  
7

8 Maria E. Bleil, PhD<sup>1\*</sup>; Glenn I. Roisman, PhD<sup>2</sup>; Steven E. Gregorich, PhD<sup>3</sup>; Bradley M. Appelhans, PhD<sup>4</sup>; Robert A.  
9 Hiatt, MD, PhD<sup>5</sup>; Robert C. Pianta, PhD<sup>6</sup>; Anna L. Marsland, PhD<sup>7</sup>; George M. Slavich, PhD<sup>8</sup>; Alexis S. Thomas,  
10 MPH<sup>1</sup>; Winnie S. Yeung, BA<sup>1</sup>; and Cathryn Booth-LaForce, PhD<sup>1</sup>  
11  
12

13 <sup>1</sup>Child, Family, and Population Health Nursing, University of Washington, Seattle, WA, USA

14 <sup>2</sup>Institute of Child Development, University of Minnesota, Minneapolis, MN, USA

15 <sup>3</sup>Department of Medicine, University of California San Francisco, San Francisco, CA, USA

16 <sup>4</sup>Department of Preventive Medicine, Rush University Medical Center, Chicago, IL, USA

17 <sup>5</sup>Department of Epidemiology and Biostatistics, University of California San Francisco, San Francisco, CA, USA

18 <sup>6</sup>School of Education and Human Development, University of Virginia, Charlottesville, VA, USA

19 <sup>7</sup>Department of Psychology, University of Pittsburgh, Pittsburgh, PA, USA

20 <sup>8</sup>Department of Psychiatry and Biobehavioral Sciences, University of California Los Angeles, Los Angeles, CA, USA  
21  
22  
23

24 **\*Corresponding Author:** Maria E. Bleil, PhD, Department of Child, Family, and Population Health Nursing,  
25 University of Washington, Box 357262, Seattle, WA 98195, USA.

26 Email: [mbleil@uw.edu](mailto:mbleil@uw.edu)  
27  
28

29 Abstract word count: 300

30 Number of references: 77

31 Word count: 7373  
32

33 **ORCID IDs:**

34 **Maria Bleil**, <https://orcid.org/0000-0002-2006-4533>  
35  
36  
37  
38  
39  
40  
41  
42  
43  
44  
45  
46  
47  
48  
49  
50  
51  
52  
53  
54  
55  
56  
57  
58  
59  
60

## ABSTRACT

### Purpose

The purpose of the current study, The National Institute of Child Health and Human Development (NICHD) Study of Health in Early and Adult Life (SHINE), was to build on the landmark Study of Early Child Care and Youth Development (SECCYD), a longitudinal birth cohort initiated in 1991, by conducting a health-focused follow-up of the now adult participants. This effort has produced an invaluable resource for the pursuit of life course research examining links between early life risk and resilience factors and adulthood health and disease risk.

### Participants

Of the 927 NICHD SECCYD participants available for recruitment in the current study, 705 (76.1%) participated. Participants were between 26-31 years and living in diverse geographic locations throughout the United States (US).

### Findings to date

In descriptive analyses, the sample exhibited risk on health status indicators, especially related to obesity, hypertension, and diabetes. Of particular concern, the prevalence of hypertension (29.4%) and diabetes (25.8%) exceeded national estimates in similar-age individuals. Health behavior indicators generally tracked with the parameters of poor health status, showing a pattern of poor diet, low activity, and disrupted sleep. The juxtaposition of the sample's relatively young age (mean=28.6 years) and high educational status (55.6% college educated or greater) with its poor health status is noteworthy, suggesting a dissociation between health and factors that are typically health protective. This is consistent with observed population health trends which show a worsening of cardiometabolic health status in younger generations of Americans.

### Future plans

The current study, SHINE, lays the groundwork for future analyses in which the uniquely robust measures collected as a part of the original NICHD SECCYD will be leveraged to pinpoint specific early life risk and resilience factors as well as the correlates and potential mechanisms accounting for variability in health and disease risk indicators in young adulthood.

### Strengths and limitations of this study

- The current study, SHINE, leveraged the original NICHD SECCYD to extend and maximize the value of this longitudinal birth cohort by collecting adulthood measures of health, thereby, creating an invaluable resource for the pursuit of life course research relating early life exposures to adulthood health and disease risk.
- Gold standard methods were used for the measurement of each health status and health behavior indicator.
- Extensive recruitment methods were used to engage participants living in different locations throughout the US and adaptations to the study procedures were developed (e.g., 'self-administered' study protocol) to allow flexibility with participation, especially needed through the COVID-19 pandemic.
- The nature of the data collection required that data collection teams work in the field to implement the study protocols, thus, resulting in many challenges, including the management of numerous staff persons, physical distance from the participants, and varied data collection environments.

## INTRODUCTION

The National Institute of Child Health and Human Development (NICHD) Study of Early Child Care and Youth Development (SECCYD) is a landmark study of child development conducted in the United States (US) between 1991 and 2009.[1] It was initiated by NICHD to characterize impacts of early childcare environments on domains of child social, emotional, and cognitive development as well as aspects of physical development and health. Families were enrolled at the child's birth from diverse geographic locations and followed annually over the course of the study. The breadth and depth of measurement available in the NICHD SECCYD has made it a unique resource for developmental scientists, supporting a wealth of discovery in broad areas of child health and well-being. To date, well over one thousand scientific research articles have been published leveraging these data (e.g.,[1-6]) with additional efforts employed to follow the members of this longitudinal birth cohort who are now in young adulthood.

The value of the NICHD SECCYD continues to grow over time, most especially in its potential to inform timely research questions relating early life environments to adulthood health and disease risk.[7, 8] Burgeoning areas of research suggest the origins of adulthood health and disease are rooted in early life environments.[9-14] In these studies, markers indexing childhood exposures such as maladaptive family interactions (e.g., abuse) and lower socioeconomic status (e.g., low parental education) have been identified as early life risk factors for long-term disease and mortality outcomes, as well as intermediate health conditions (e.g., obesity).[15-20] The epidemiological studies reporting these associations, however, typically lack the depth of measurement present in a study such as the NICHD SECCYD, precluding opportunities to pinpoint the processes and mechanisms underlying these effects, but see studies.[21-24] As examples, areas of measurement uniquely available in the NICHD SECCYD include repeated, multi-method assessments of attachment security, parenting sensitivity, childcare quality, and nuances of early educational environments as well as child-level assessments of intelligence, temperament, and social relationships. Moreover, a focus on upstream factors relevant to later life health is a growing imperative as traditional disease-focused approaches targeting the remediation of poor health in adulthood are simply not working. The US, compared to other high-income countries, ranks the lowest in life expectancy, the highest in infant mortality, and has the highest percentage of adults who are overweight or obese,[25-27] itself a significant predictor of morbidity and mortality.[28-30] All the while, spending on healthcare exceeds \$3 trillion US Dollar (USD) per year.[31, 32] These worsening trends underscore the profound need to move away from conventional strategies for intervention to instead consider how early life risk and resilience factors may be leveraged in the context of primary prevention efforts.

1  
2  
3 The objective of the current study was to actualize the potential of the NICHD SECCYD by conducting a  
4 follow-up assessment of the now adult participants (ages 26-31 years). This follow-up, re-branded The Study of  
5 Health in Early and Adult Life (SHINE) focused on the collection of detailed health information, using gold  
6 standard methods for the assessment of blood pressure and anthropometrics, the ascertainment of blood and  
7 hair samples, the implementation of 24-hour diet recall interviews and 7-day actigraphy for activity/sleep  
8 monitoring, and the completion of comprehensive self-report questionnaires in multiple areas of health and  
9 well-being. The availability of these measures will make possible the pursuit of prospective research questions  
10 linking the wealth of existing data characterizing the early life environments of the participants as children and  
11 adolescents with the newly collected data characterizing the health status of the participants now as adults.  
12 Here, in the current report, we present results describing these adulthood health measures and outline our  
13 analytical plans to test a series of life course models integrating the NICHD SECCYD and SHINE data. Additionally,  
14 we also discuss our unique experiences and lessons learned during the SHINE data collection in which we faced  
15 many challenges conducting in-person health assessments among participants living in distant locations  
16 throughout the US and in a period overlapping with the COVID-19 pandemic.  
17  
18  
19  
20  
21  
22  
23  
24  
25  
26  
27

## 28 **COHORT DESCRIPTION**

### 31 **Sample overview:**

32  
33 Participants in the current study were originally recruited at birth as a part of the NICHD SECCYD, a  
34 prospective study of children and their families followed between birth and adolescence to examine trajectories  
35 of child health and development.[1] Families were from 10 geographically diverse study sites in the US: Seattle,  
36 WA; Madison, WI; Irvine, CA; Pittsburgh, PA; Wellesley, MA; Little Rock, AR; Philadelphia, PA; Morganton, NC;  
37 Lawrence, KS; and Charlottesville, VA. In the first 11 months of 1991, all mother-infant dyads of babies born  
38 within preselected 24-hour intervals at participating hospitals were screened. Exclusion criteria were mother  
39 <18 years old, non-English speaking, or had a substance use disorder; serious medical problems (mother or  
40 infant); lived >1 hour from the study site; child being placed for adoption; concurrent participation in another  
41 study; and refusal to participate in initial screening. Additional sampling requirements were imposed (e.g., 10%  
42 recruitment of single parent households) to ensure that the sociodemographic composition of the final sample  
43 (N=1364 families; n=659 girls [48.3%] and n=705 boys [51.7%]) was proportionate to the population of the  
44 geographies from which they were recruited, according to the 1990 US Census.  
45  
46  
47  
48  
49  
50  
51  
52  
53  
54  
55  
56  
57  
58  
59  
60

1  
2  
3 Following completion of the final data collection time point in the original NICHD SECCYD at age 15  
4 years, 946 adolescent participants and their parents agreed to be re-contacted for future research studies.  
5 Additional research contacts occurred at participant ages 17-18 years,[33] age 22 years,[34] and ages 26-27  
6 years,[35, 36] after which time 930 young adults remained in the sample. This reduction in sample size was due  
7 to 14 participants who rescinded their consent for future contact and 2 participants who died. Among these 930  
8 participants, 3 additional participants died subsequently, leaving 927 participants available for recruitment in  
9 the current study. All participant deaths were confirmed by death records, obituaries, or verbal confirmation by  
10 parents.  
11  
12  
13  
14  
15  
16  
17

18 The current study, a follow-up to the NICHD SECCYD re-branded SHINE, located these now young adults  
19 (n=927, ages 26-31) to complete an in-person study visit. The SHINE data collection occurred between 2018-  
20 2022. Extensive social, behavioral, and health data were collected with the goal of testing effects of early life  
21 exposures, and the mechanisms of these effects, on trajectories of health and disease risk over time. The current  
22 study is the first among the existing NICHD SECCYD data collection efforts to engage the participants as adults  
23 (age  $\geq 18$  years) with an in-depth, in-person protocol focused on the assessment of cardiometabolic health  
24 specifically. The current study is also unique in its design and methodological approach as it was led by a single  
25 research team at the University of Washington (UW) who oversaw the in-person data collection at numerous  
26 locations throughout the US. To execute the study from a distance, and during the COVID-19 pandemic, many  
27 useful adaptations were developed, some originating from experiences of failure that are shared here as lessons  
28 to other investigators interested in conducting similar work (see details in Challenges and lessons learned  
29 section below).  
30  
31  
32  
33  
34  
35  
36  
37  
38  
39

40 Figure 1 summarizes available data from the current study, SHINE, as well as the original NICHD SECCYD  
41 in the context of the timeline of these data collections.  
42  
43  
44

45 Informed consent and assent for the original NICHD SECCYD were obtained from parents and children,  
46 respectively. Informed consent for the NICHD SECCYD follow-up study, SHINE, was obtained from the now adult  
47 target participants. For the NICHD SECCYD, the research was approved by the Institutional Review Boards (IRB)  
48 of each university-based study site. For SHINE, the research was approved by the Human Subjects Division (HSD)  
49 of the University of Washington. All methods were carried out in accordance with relevant guidelines and  
50 regulations.[37] Participants were financially compensated in the original NICHD SECCYD and at each follow-up,  
51 including the current study, based on time and burden and in alignment with the IRBs and UW HSD.  
52  
53  
54  
55  
56  
57  
58  
59  
60

### **Participation rates:**

The 927 participants (468 [50.5%] women, 459 men [49.5%]) available for recruitment in the current study were contacted using information from prior assessments. Contacts were initiated via email, phone, text, or social media, including Facebook and LinkedIn. Efforts to update participant contact information included reaching out to alternative contacts such as parents or grandparents, searching social media sites, mailing postcards to physical addresses, and using paid, secured services offered through White Pages, LexisNexis, and TransUnion. Over time, various ad hoc strategies were used to further incentivize participation, including increasing the study payment (e.g., from \$250 to \$300 to \$400 over time for completion of the full protocol), offering payment for screening, engaging participants through newsletters and e-cards, and developing alternate protocols that allowed flexibility in completing only portions of the study or in completing some portions of the study remotely and independently.

Extensive recruitment efforts resulted in the following participation rates. In the full sample, 705 (of 927; 76.1%) individuals participated in the study. Of the 222 non-participants, 31 (13.9%) declined, primarily due to being too busy, 6 (2.7%) rescinded their consent for future contact, 79 (35.6%) were initially engaged but did not follow up, 90 (40.5%) were unresponsive to all contact efforts (using contact information that was presumed to be valid but was not verified), 13 (5.9%) had no contact information, and 3 (1.4%) were confirmed to be incarcerated during the period of recruitment. With respect to sex assigned at birth, 378 (of 468; 80.8%) women and 327 (of 459; 71.2%) men participated in the study, reflecting a significant difference in rates of participation with women more likely to participate ( $\chi^2(1, N=927) = 11.5, p < .001$ ). Five participants no longer identified as the sex assigned at birth. Instead, two participants identified as transgender male, one as transgender female, and two as non-binary. Finally, participation rates by original recruitment site were as follows: Seattle, WA (88.1%); Madison, WI (75.5%); Irvine, CA (76.2%); Pittsburgh, PA (76.6%); Wellesley, MA (67.0%); Little Rock, AR (85.2%); Philadelphia, PA (71.9%); Morganton, NC (65.3%); Lawrence, KS (79.6%); and Charlottesville, VA (78.3%). However, reports of rates by original recruitment site are misleading insofar as a sizable proportion of participants (221 [31.3%]) had relocated and completed the protocol at a different main or ancillary site or chose to complete one of the remote protocols even if they were within travel distance. Of note, all participants were offered paid travel accommodations to reduce barriers to in-person participation.

### **Data collection overview:**

All participants were engaged using an introductory letter describing the study, followed by phone and email contacts. Exclusions were temporary, including pregnancy or breastfeeding and current/recent cold or flu,



1  
2  
3 and participants were followed and re-screened as necessary to identify changes in eligibility. Women who were  
4 not using medications affecting their menstrual cycle, and who could predict the start of their period within 5  
5 days, were scheduled to participate in the early follicular phase between menstrual cycle days 2-7. All  
6 participants were invited to participate in the full study protocol with paid accommodations for travel offered  
7 when necessary. However, based on participant preferences and circumstances, alternate study protocols were  
8 also developed to reduce the time/burden of study participation. Of the 705 participants, 551 (78.2%)  
9 participated in the full study protocol which entailed an in-person home visit (3-4 hours) and two post-visit  
10 activities occurring over a 1- to 2-week period. Sixteen (2.3%) participated in the partial study protocol, which  
11 entailed a standard subset of study activities. Ninety-nine (14.0%) participated in the self-administered study  
12 protocol, which entailed a standard subset of study activities that could be performed by the participant  
13 remotely and independently. Finally, 39 (5.5%) completed the study questionnaires only. See details in the 'Data  
14 collection protocols' section below.  
15  
16  
17  
18  
19  
20  
21  
22  
23  
24

25 The structure of the data collection both retained and built on the 10 original recruitment sites. At each  
26 of these 10 main sites, a data collector and mobile phlebotomist were hired and trained to administer the study  
27 protocol. The study visits occurred primarily in the homes of the participants. However, based on the locations  
28 of participants, at times, a central location for data collection was established (e.g., in a rented professional  
29 office space) and the participants would travel to the data collection team. After each study visit, all associated  
30 research materials were returned to the UW research team in Seattle WA who managed and oversaw the data  
31 collection efforts at all locations throughout the study period. At the study visit, a standard paper form was used  
32 to record the collected data in real-time (e.g., blood pressure readings) and to document compliance with each  
33 step of the data collection protocol. The information on this form was entered into the online data capture tool,  
34 REDCap, while the visit was still on-going, making it immediately available to the UW research team to review  
35 and intervene (if needed) before the visit ended. Limited paperwork, including the form referenced above, and  
36 the hair samples were shipped by regular mail and the processed blood samples were immediately placed on  
37 dry ice and shipped overnight by FedEx. The UW research team also conducted all of the post-visit research  
38 activities as well as the three study protocols that did not have an in-person component.  
39  
40  
41  
42  
43  
44  
45  
46  
47  
48  
49

50 All data collectors and mobile phlebotomists received intensive training led by MEB and the UW  
51 research team. The data collector training included human subjects research training (online), formal orientation  
52 to the study procedures (online), and a 2-day in-person training session at UW. The first day focused on training  
53 for each protocol segment and the second day required the successful execution of the full study protocol on a  
54  
55  
56  
57

1  
2  
3 practice participant to receive certification. The data collectors generally had college degrees with at least 3  
4 years of experience working in a research setting. All data collectors worked concurrently in relevant areas of  
5 social or health sciences (e.g., nursing, social work, psychology, public health). The mobile phlebotomist training  
6 included human subjects research training (online), formal training on the blood collection and blood processing  
7 procedures (online), and a 1-day in-person training session at UW. The in-person training required the successful  
8 execution of the blood collection and blood processing procedures on a practice participant to receive  
9 certification. The mobile phlebotomists generally had at least 2 years of experience working in mobile  
10 phlebotomy as well as experience performing blood processing. All mobile phlebotomists worked concurrently  
11 in relevant medical settings and all were required to maintain their professional credentials in their respective  
12 states. For both the data collector and mobile phlebotomist, as needed, additional training was offered in-  
13 person and online and practice supplies were provided for independent practice before beginning data  
14 collection. After data collection began, all data collection materials and samples were inspected by the UW  
15 research team, research visits were observed periodically via Zoom, and constructive feedback was provided  
16 throughout the period of data collection. Over time, 2 data collectors and 2 mobile phlebotomists left their  
17 positions and were replaced, repeating the same training process described above.  
18  
19  
20  
21  
22  
23  
24  
25  
26  
27  
28  
29

30 The 10 main data collection sites were set up over time in this order: Seattle, WA (started January 2018);  
31 Madison, WI (started May 2018); Irvine, CA (started May 2018); Pittsburgh, PA (started October 2018);  
32 Wellesley, MA (started November 2018); Little Rock, AR (started March 2019); Philadelphia, PA (started March  
33 2019); Morganton, NC (started June 2019); Lawrence, KS (started July 2019); and Charlottesville, VA (started  
34 February 2020). Once a site was set up, it generally remained open. However, intermittent disruptions were  
35 experienced based on turnover among the data collectors/mobile phlebotomists and the COVID-19 pandemic.  
36 All sites were open for at least 2 years, ranging between 2-4 years.  
37  
38  
39  
40  
41  
42  
43

44 In addition, based on the locations of participants outside of these 10 main sites, several ancillary sites  
45 were set up. A data collector and mobile phlebotomist from one of the main sites traveled to the indicated  
46 ancillary site to conduct the study protocol among a pre-identified 'cluster' of participants over a period of days.  
47 The ancillary data collection sites included the following: San Francisco Bay Area (2019); San Jose, CA (2019);  
48 Denver, CO (2020); Atlanta, GA (2020); Washington, DC (2020); New York, NY (two times in 2021); Portland, OR  
49 (2019, 2021); Kansas City, MO (2021); and Nashville, TN (2021).  
50  
51  
52  
53  
54  
55  
56  
57  
58  
59  
60

### **Data collection protocols:**

Full study protocol. The full study protocol entailed an in-person home visit (3-4 hours) and two post-visit activities occurring over a 1- to 2-week period. The in-person home visit was scheduled in the morning between 7 am and 10 am local time and included the measurement of blood pressure and anthropometrics (height, weight, and waist and hip circumferences), the collection of blood and hair samples, participation in one 24-hour diet recall interview, and the completion of self-report questionnaires in areas of health and well-being. The post-visit activities included participation in two additional 24-hour diet recall interviews (by phone) and completion of activity/sleep monitoring using an activity monitor worn 24 hours/day over a 7-day period.

Partial study protocol. The 'partial' study protocol included participation in three 24-hour diet recall interviews (by phone), completion of the self-report questionnaires (online), and completion of activity/sleep monitoring using an activity monitor worn 24 hours/day over a 7-day period. Therefore, in the 'partial' study protocol, data are missing for the assessment of blood pressure and anthropometrics as well as the collection of blood and hair samples. Among the 16 (2.3%) participants who completed this protocol, 6 (37.5%) did so because they were living outside of the US and the remainder expressed miscellaneous reasons for their preference for this protocol.

Self-administered study protocol. The 'self-administered' study protocol included the study protocol segments that could be performed by the participant remotely and independently, albeit with support and oversight by the UW research team. These segments included the measurement of blood pressure and anthropometrics (height, weight, and waist and hip circumferences), participation in three 24-hour diet recall interviews (by phone), completion of the self-report questionnaires (online), and completion of activity/sleep monitoring using an activity monitor worn 24 hours/day over a 7-day period. Participants were provided all the supplies/equipment (e.g., blood pressure monitor, flat scale, tape measure, and activity monitor) and detailed instructions necessary to complete this protocol at home. Real-time support was provided by the UW research team over phone/email at the time of the collection. Participants were also provided videos produced by the UW research team that demonstrated the correct method of taking the blood pressure and anthropometric measures. The self-administered study protocol was developed, in part, in response to the COVID-19 pandemic, allowing data collection to continue without having in-person contact with the participants. Therefore, in the 'self-administered' protocol, data are missing for the collection of blood and hair samples. Among the 99 (14.0%) participants who completed this protocol, all occurring during the pandemic, the majority (90 [90.9%]) did so because they lived in locations that were distant from one of the main or ancillary data collection sites and they

1  
2  
3 did not want to travel to the site, even though paid travel accommodations were offered. The remainder  
4 expressed miscellaneous reasons for their preference for this protocol.  
5  
6  
7

8 Questionnaires only study protocol. The 'questionnaires-only' study protocol included completion of the  
9 self-report questionnaires online with real-time support and follow-up offered by the UW research team.  
10 Therefore, in the 'questionnaires only' protocol, data are missing for all of the other study assessments (i.e.,  
11 blood pressure, anthropometrics, blood and hair samples, 24-hour diet recall interviews, and the activity  
12 monitor). Among the 39 (5.5%) participants who completed this protocol, the majority (29 [74.4%]) responded  
13 to the questionnaire link without communicating with the study team directly and the remainder expressed  
14 miscellaneous reasons for their preference for this protocol.  
15  
16  
17  
18  
19  
20  
21

22 Across the study protocols, with respect to the main data collection components, complete data are  
23 available for 647 (91.8%) participants for the blood pressure assessment, 664 (94.2%) participants for the  
24 anthropometric assessment, 527 (74.8%) participants for the blood collection, 468 (66.4%) participants for the  
25 hair collection, 700 (99.3%) for the self-report questionnaires, 664 (94.2%) participants for at least one 24-hour  
26 diet recall interview, and 581 (82.4%) participants for the valid wear of the activity monitor.  
27  
28  
29  
30  
31

### 32 **Available data:**

33  
34 Blood pressure assessment. The circumference of the participant's bare upper arm was measured first  
35 to enable selection of the correct cuff size. Next, the participant was directed to sit at a table in a relaxed  
36 position with legs uncrossed, feet flat on the floor, and no talking for a 5-minute rest period. Following the rest  
37 period, the pre-selected cuff was correctly positioned on the left arm with the arm resting on the table at heart  
38 level. A research grade, automated blood pressure monitor was used, pre-programmed to take three  
39 consecutive measurements with one minute in between readings. The cuff was then re-positioned on the right  
40 arm and the measurements were repeated.  
41  
42  
43  
44  
45  
46

47 Anthropometric assessment. The participant was directed to remove shoes, all excess clothing and  
48 accessories, and any items from pockets. First, a research grade flat scale was positioned on a hard surfaced  
49 floor to measure weight. Next, a research grade stadiometer was assembled and positioned against an open  
50 wall to measure height. The height measurement was taken with the participant's heels, hips, shoulders, and  
51 head aligned along the back of the stadiometer. Finally, a tension-controlled tape measure was positioned at the  
52 midpoint between the iliac crest and lowest rib to measure waist circumference (on the exhalation) and re-  
53  
54  
55  
56  
57

1  
2  
3 positioned at the widest point of the hips to measure hip circumference.  
4  
5

6 Blood sample collection. The participant's blood was drawn from the arm in a seated or supine position  
7  
8 by a trained phlebotomist. The blood draw occurred in the morning between 7 am and 10 am following an  
9  
10 overnight fast starting at 9 pm. Other restrictions included cessation of exercise, alcohol intake, and  
11  
12 nonessential cold/allergy and headache medications 12 hours prior, the cessation of caffeine 8 hours prior, and  
13  
14 the cessation of nicotine 1 hour prior. Following the draw, the blood was processed and aliquoted on site. The  
15  
16 samples were then placed on dry ice and packaged for shipment by FedEx overnight to the UW research team  
17  
18 who received and stored them at -80 degrees Celsius for later analysis. In batch, assays were performed in areas  
19  
20 of cardiometabolic health (e.g., total cholesterol, high-density lipoprotein [HDL], low-density lipoprotein [LDL],  
21  
22 triglycerides, glucose, insulin, hemoglobin A1c) and inflammation (e.g., c-reactive protein [CRP]).

23 Hair sample collection. The target area on the participant's head (posterior vertex) was identified and 2  
24  
25 to 3 'bundles' of hair were tied off in this region, together equaling in quantity the diameter of a standard  
26  
27 writing pen. These bundles were then cut close to the scalp and affixed to a pre-prepared foil envelope for  
28  
29 shipment by regular mail to the UW research team who inspected and stored the hair samples at room  
30  
31 temperature for later analysis. If necessary, hair outside of the target area was taken, excluding facial hair or hair  
32  
33 along the hairline. Participants also completed a self-report questionnaire regarding hair washing and use of hair  
34  
35 care products and styling tools. In batch, assays were performed to assess hair cortisol, indexing the activity of  
36  
37 the hypothalamic-pituitary-adrenal (HPA) axis as a marker of psychological stress experienced over the  
38  
39 preceding months.

40 Diet recall interviews. The participant's dietary intake over the prior 24 hours was assessed using the  
41  
42 computer-based Automated Self-Administered 24-Hour Dietary Assessment (ASA24).[38] One ASA24 interview  
43  
44 was conducted in-person and two others were conducted over the phone, all occurring over a one-week period  
45  
46 with one interview referencing a weekend day. Data collected through these interviews was scored using the  
47  
48 Healthy Eating Index-2015 (HEI-2015) scoring system developed by the US Department of Agriculture.[39] This  
49  
50 scoring system produces an overall diet quality score as well as 13 values related to key nutrients or food  
51  
52 components based on US Department of Health & Human Services 2015-2020 Dietary Guidelines.

53 Activity monitor wear. The participant was directed to wear an activity monitor on the right hip during  
54  
55 the day for the assessment of activity and on the wrist of the nondominant hand during the night for the  
56  
57

1  
2  
3 assessment of sleep. The duration of wear was 24 hours per day for seven consecutive days, including two  
4 weekend days. The participant completed a log during this period, recording wake and sleep times each day.  
5  
6 Additional instructions were provided regarding the removal of the device when exposed to water. The activity  
7 monitor was provided by mailing it to the participant along with a postage-paid box for the participant to use to  
8 return the monitor following wear. Upon return of the activity monitor, the data were then exported from the  
9 device and scored using proprietary software to derive activity variables such as moderate/vigorous activity,  
10 number of steps, and sedentary time as well as sleep variables such as sleep latency, duration, and awakenings.  
11  
12  
13  
14  
15

16  
17 **Self-report questionnaires.** The participant completed a comprehensive set of self-report questionnaires  
18 using the online data capture tool, REDCap. The participant was assisted by the UW research team (either in-  
19 person or remotely depending on the study protocol) who provided oversight, general support, and referrals to  
20 diverse support services. In summary, the questionnaires pertained to sociodemographic and neighborhood  
21 characteristics; medical, reproductive, and psychiatric history; health behaviors in areas of smoking, exercise,  
22 nutrition, and sleep; cognitive function in areas of executive functioning and decision-making; stress, adverse  
23 events, and psychological well-being, including depression and anxiety symptoms; and family composition and  
24 family, social, and romantic relationships.  
25  
26  
27  
28  
29

30 In these areas, specific questionnaires were selected based on psychometric evaluation showing high  
31 reliability and validity. As well, a subset of questionnaires was retained due to their use in the original NICHD  
32 SECCYD. Although too numerous to list, examples of these questionnaires include: health behaviors (e.g., Dietary  
33 Screening Questionnaire [DSQ],[40] Pittsburgh Sleep Quality Index [PSQI][41]); stress and adversity (e.g.,  
34 Perceived Stress Scale [PSS],[42] Stress and Adversity Inventory for Adults [STRAIN][43]), psychological well-  
35 being (e.g., Center for Epidemiologic Studies Depression [CESD],[44] Adult Self Report [ASR][45]), and social  
36 relationships (e.g., Dyadic Adjustment Scale [DAS],[46] Experiences in Close Relationships – Relationship  
37 Structures questionnaire [ECR-RS][47]).  
38  
39  
40  
41  
42  
43  
44

#### 45 **Challenges and lessons learned:**

46  
47 The study's original efforts to implement phlebotomy services in the numerous locations of the study  
48 participants included use of advertised mobile phlebotomy companies. These efforts failed, however, as such  
49 companies were not able to provide well-trained phlebotomists, were not able to provide coverage for the  
50 geographical locations of the participants, and were not positioned to properly train their employees to perform  
51 the study protocol. As a result, the study transitioned to an independent contractor model in which mobile  
52 phlebotomists were sought through indeed.com, interviewed and trained remotely, and then brought to UW to  
53  
54  
55  
56  
57

1  
2  
3 be certified in the proper implementation of the blood collection and blood processing protocols. As  
4 independent contractors, the mobile phlebotomists were provided liability insurance, a centrifuge if needed,  
5 and all indicated supplies. Otherwise, expenses such as gas mileage were covered in their contracts as a part of  
6 their per participant payment. Although the independent contractor model required more time for recruitment,  
7 training, and on-going administrative tasks related to contracts and invoicing, it was superior to other options  
8 and produced a higher quality blood sample collection.  
9  
10  
11  
12  
13  
14

15 In a related issue, the study's original efforts to freeze and ship the blood samples included attempts to  
16 find common in-field storage locations that could store and send the samples in batch as they accumulated.  
17 These efforts failed, however, as few lab entities offered such services, it was impossible to cover the  
18 geographical locations of the participants, and any available services were cost prohibitive. As a result, the study  
19 transitioned to the use of dry ice with individual blood sample shipments sent by the mobile phlebotomist after  
20 each study visit. The challenges associated with this approach included limited availability of dry ice in some  
21 geographical areas, human error in measuring the correct quantity of dry ice, and variability in the proximity of  
22 FedEx facilities that accept packages containing dry ice. Despite these challenges, this approach overall was  
23 superior to other options. In all, seven shipments arrived thawed, three due to human error (not enough dry ice)  
24 and four due to FedEx delays. However, an add-on protocol in which participants were asked to do a second  
25 blood draw if needed was used to re-draw samples for five participants, leaving only two participants with  
26 ruined samples. Additional compensatory efforts were developed to use 'extra' dry ice and to avoid shipments  
27 around holiday times and bad weather.  
28  
29  
30  
31  
32  
33  
34  
35  
36  
37

38 A final main challenge, not unique to the current study, pertained to the COVID-19 pandemic. In mid-  
39 2020, following a university mandated 3-month discontinuation of all in-person research, the current study  
40 faced the decision of whether to resume in-person research. At this crossroads, the 'self-administered' study  
41 protocol was developed to offer participants an option to complete the study assessments that were able to be  
42 completed remotely and independently. As a part of this protocol, extensive work was put into the construction  
43 of custom shipping boxes to send supplies and equipment (e.g., blood pressure monitor, flat scale) and the  
44 development of a website that housed videos and special instructions regarding the correct collection of each  
45 measure. Although this protocol, by definition, meant the blood and hair sample collections would be missing, it  
46 allowed the study to move forward with another assessment approach in its toolkit. Moreover, the 'self-  
47 administered' protocol remains broadly useful for all research conducted from a distance. Subsequently,  
48 additional add-on protocols were devised to collect the in-person data missed during this period.  
49  
50  
51  
52  
53  
54  
55  
56  
57

**Patient and public involvement:**

No patient or public involvement.

**FINDINGS TO DATE**

The sociodemographic characteristics of the sample are described in Table 1. On average, the participants were 28.6 years of age (range: 26.2-31.3 years). With respect to ethnicity, 6.4% were Hispanic and 93.6% non-Hispanic, while the examination of race showed 14.9% belonged to historically marginalized groups, including 10.2% Black, 1.1% Asian/Pacific Islander, and 0.2% American Indian/Alaska Native (Eskimo, Aleutian) as well as 3.4% who were mixed race. Most participants (71.6%) reported being in a current romantic relationship and 26.1% had at least one child. Overall, the sample was well-educated with 55.6% of participants, including 58.5% of women and 52.2% of men, having a college degree or greater. This compares to 40.0% in the population, according to 2019 US Census reports of educational attainment among individuals between 25-34 years.[48] Notably, 13.6% of participants were current students, full or part-time. Of these, 69.5% were pursuing degrees at the college level or greater. If the anticipated degrees are obtained, the number of participants with a college degree or greater will grow to 59.6% of the full sample, and 64.0% of women and 54.3% of men. In addition, 39.4% of participants reported an individual income of \$50,000 or greater and 30.1% of participants reported a household income of \$100,000 or greater. Only 2.9% of participants indicated that paying for basics such as food was 'very' or 'extremely' difficult and only 9.6% of participants were living below the poverty line. However, 38.3% of participants reported they would not be able to maintain their current standard of living for more than 2 months if they lost their income, reflecting some financial instability. In sum, inspection of the sociodemographic characteristics of the sample revealed an overall pattern of relative socioeconomic advantage among the participants on most parameters of education and income.

Table 1. Description of sociodemographic characteristics in the full sample and in women and men separately.

|                          | <b>Total<sup>†</sup></b><br><b>(n=705)</b><br><i>N (%) or mean (SD), range</i> | <b>Women<sup>†</sup></b><br><b>(n=378)</b><br><i>N (%) or mean (SD), range</i> | <b>Men<sup>†</sup></b><br><b>(n=327)</b><br><i>N (%) or mean (SD), range</i> |
|--------------------------|--------------------------------------------------------------------------------|--------------------------------------------------------------------------------|------------------------------------------------------------------------------|
| <b>Age (in years)</b>    | 28.6 (1.2), 26.2-31.3                                                          | 28.7 (1.2), 26.2-31.2                                                          | 28.6 (1.2), 26.4-31.3                                                        |
| <b>Race/ethnicity:</b>   |                                                                                |                                                                                |                                                                              |
| Hispanic                 | 45 (6.4%)                                                                      | 19 (5.0%)                                                                      | 26 (8.0%)                                                                    |
| White, non-Hispanic      | 555 (78.7%)                                                                    | 303 (80.1%)                                                                    | 252 (77.0%)                                                                  |
| Black, non-Hispanic      | 72 (10.2%)                                                                     | 40 (10.6%)                                                                     | 32 (9.8%)                                                                    |
| Asian/PI, non-Hispanic   | 8 (1.1%)                                                                       | 4 (1.1%)                                                                       | 4 (1.2%)                                                                     |
| AI/AN, non-Hispanic      | 1 (0.2%)                                                                       | 0 (0.0%)                                                                       | 1 (0.3%)                                                                     |
| Mixed race, non-Hispanic | 24 (3.4%)                                                                      | 12 (3.2%)                                                                      | 12 (3.7%)                                                                    |



|                                           |                                           |                                           |                                           |
|-------------------------------------------|-------------------------------------------|-------------------------------------------|-------------------------------------------|
| <b>Family composition:</b>                |                                           |                                           |                                           |
| People living in home                     | 2.7 (1.4), 1-10                           | 2.8 (1.4), 1-10                           | 2.5 (1.3), 1-7                            |
| Married or living as married              | 241 (34.4%)                               | 150 (39.7%)                               | 91 (28.3%)                                |
| Current romantic relationship             | 501 (71.6%)                               | 295 (78.0%)                               | 206 (64.0%)                               |
| One or more children                      | 183 (26.1%)                               | 123 (32.5%)                               | 60 (18.6%)                                |
| <b>Education:</b>                         |                                           |                                           |                                           |
| Less than HS diploma                      | 7 (1.0%)                                  | 1 (0.3%)                                  | 6 (1.9%)                                  |
| HS diploma/GED                            | 88 (12.6%)                                | 41 (10.8%)                                | 47 (14.6%)                                |
| Some college, AA, certificate, trade      | 216 (30.8%)                               | 115 (30.4%)                               | 101 (31.3%)                               |
| College degree or greater                 | 389 (55.6%)                               | 221 (58.5%)                               | 168 (52.2%)                               |
| <b>Student status:</b>                    |                                           |                                           |                                           |
| Part-time                                 | 34 (4.9%)                                 | 24 (6.4%)                                 | 10 (3.1%)                                 |
| Full-time                                 | 61 (8.7%)                                 | 43 (11.4%)                                | 18 (5.6%)                                 |
| <b>Employment:</b>                        |                                           |                                           |                                           |
| Part-time, for pay                        | 85 (12.1%)                                | 59 (15.6%)                                | 26 (8.1%)                                 |
| Full-time, for pay                        | 516 (73.7%)                               | 256 (67.7%)                               | 260 (80.7%)                               |
| <b>Individual income:</b>                 |                                           |                                           |                                           |
| <\$10,000                                 | 78 (11.1%)                                | 48 (12.7%)                                | 30 (9.3%)                                 |
| \$10,000-\$29,999                         | 167 (23.9%)                               | 104 (27.5%)                               | 63 (19.6%)                                |
| \$30,000-\$49,999                         | 179 (25.6%)                               | 89 (23.5%)                                | 90 (27.9%)                                |
| \$50,000-\$99,999                         | 213 (30.4%)                               | 111 (29.4%)                               | 102 (31.7%)                               |
| \$100,000+                                | 63 (9.0%)                                 | 26 (6.9%)                                 | 37 (11.5%)                                |
| <b>Household income:</b>                  |                                           |                                           |                                           |
| <\$20,000                                 | 75 (10.8%)                                | 43 (11.4%)                                | 32 (10.0%)                                |
| \$20,000-\$49,999                         | 163 (23.5%)                               | 90 (23.9%)                                | 63 (22.9%)                                |
| \$50,000-\$99,999                         | 248 (35.7%)                               | 127 (33.8%)                               | 121 (37.9%)                               |
| \$100,000-\$149,999                       | 126 (18.1%)                               | 74 (19.7%)                                | 52 (16.3%)                                |
| \$150,000+                                | 83 (11.9%)                                | 42 (11.2%)                                | 41 (12.9%)                                |
| <b>Financial disadvantage:</b>            |                                           |                                           |                                           |
| Very/extreme difficulty paying for basics | 20 (2.9%)                                 | 14 (3.7%)                                 | 6 (1.9%)                                  |
| <2-month safety net if lost income        | 268 (38.3%)                               | 149 (39.6%)                               | 119 (37.1%)                               |
| Adjusted household income*                | \$46,176 (\$36,509),<br>\$1,667-\$287,500 | \$43,312 (\$33,467),<br>\$1,667-\$162,500 | \$49,552 (\$39,586),<br>\$2,500-\$287,500 |
| Income-to-needs ratio*                    | 4.7 (3.5), 0.3-22.0                       | 4.6 (3.5), 0.3-17.8                       | 4.8 (3.5), 0.3-22.0                       |
| Income below the poverty line             | 67 (9.6%)                                 | 38 (10.1%)                                | 29 (9.1%)                                 |
| Income 1.0-1.9 times the poverty line     | 95 (13.7%)                                | 62 (16.5%)                                | 33 (10.3%)                                |
| Income 2.0-2.9 times the poverty line     | 86 (12.4%)                                | 42 (11.2%)                                | 44 (13.8%)                                |
| Income >=3 times the poverty line         | 447 (64.3%)                               | 234 (62.2%)                               | 213 (66.8%)                               |

Abbreviations: PI=Pacific Islander; AI=American Indian; AN=Alaska Native; HS=high school; GED=general equivalency diploma; AA=Associates degree.

†Missing data: 5 participants did not complete the questionnaire items pertaining to family composition, education, employment, and individual income. 7 participants did not complete the questionnaire items pertaining to student status. 10 participants did not complete the questionnaire items pertaining to household income.

\*Definitions: Adjusted household income is the total household income divided by the number of individuals identified as being dependent on the income. Income-to-needs ratio is the total household income divided by the US Census poverty threshold for the number of individuals identified as being dependent on the income without respect to their relation to one another.

Information pertaining to the cardiometabolic health status of the sample is described in Table 2. Each health status indicator is first presented as a continuous variable and then as a categorical variable, coded according to established clinical guidelines. On average, the participants were overweight (mean BMI=27.8) with

52.7% of women and 63.4% of men in overweight/obese categories. Within the obese category, 5.9% of women and 6.4% of men were considered class III or severely obese. Compared to national estimates in similar-age groups (20-39 years), the percent of obese participants in the current study (29.8%) was comparable to the percent obese in the National Health Interview Survey (NHIS) (i.e., 28.5%)[49] but was lower than in the National Health and Nutrition Examination Survey (NHANES) (i.e., 39.8%).[50] In addition, in line with the distribution of BMI, 53.0% were in the high/very high range for waist circumference, reflecting significant central adiposity in the sample. With respect to blood pressure, 23.6% of women and 35.9% of men were hypertensive according to the American College of Cardiology and American Heart Association guidelines (SBP  $\geq$ 130 or DBP  $\geq$ 80), exceeding national estimates reported in NHANES (i.e., 13.0% in women and 31.2% in men) among individuals 18-39 years.[51] Moreover, a substantial number of women, 6.4% and 29.0%, were in the pre-diabetic (A1c 5.7%-6.4%) and diabetic (A1c  $>$ 6.4%) ranges, respectively, for hemoglobin A1c as were 7.0% and 22.1% of the men, respectively. As with hypertension, these numbers exceed national estimates reported in NHANES (i.e., 13% diabetic) among individuals 18 years of age or older.[52] In sum, inspection of the health status indicators in the sample revealed a distinct pattern of poor cardiometabolic health with a sizable proportion of the sample displaying values in clinically meaningful risk ranges, especially in areas of obesity, hypertension, and diabetes.

Table 2. Description of health status indicators in the full sample and in women and men separately.

|                                              | <b>Total<sup>†</sup></b><br><b>(n=705)</b><br>N (%) or mean (SD), range | <b>Women<sup>†</sup></b><br><b>(n=378)</b><br>N (%) or mean (SD), range | <b>Men<sup>†</sup></b><br><b>(n=327)</b><br>N (%) or mean (SD), range |
|----------------------------------------------|-------------------------------------------------------------------------|-------------------------------------------------------------------------|-----------------------------------------------------------------------|
| <b>Body Mass Index (BMI)</b>                 |                                                                         |                                                                         |                                                                       |
| BMI (kg/m <sup>2</sup> )                     | 27.8 (7.1), 16.7-65.9                                                   | 27.5 (7.2), 16.7-59.3                                                   | 28.2 (6.9), 16.8-65.9                                                 |
| Underweight, <18.5                           | 13 (1.9%)                                                               | 9 (2.5%)                                                                | 4 (1.3%)                                                              |
| Normal, 18.5-24.9                            | 268 (40.4%)                                                             | 158 (44.8%)                                                             | 110 (35.3%)                                                           |
| Overweight, 25.0-29.9                        | 185 (27.9%)                                                             | 79 (22.4%)                                                              | 106 (34.1%)                                                           |
| Obese, $>$ 30.0                              | 198 (29.8%)                                                             | 107 (30.3%)                                                             | 91 (29.3%)                                                            |
| Class I obesity, 30.0-34.9                   | 101 (15.2%)                                                             | 56 (15.9%)                                                              | 45 (14.5%)                                                            |
| Class II obesity, 35.0-39.9                  | 56 (8.4%)                                                               | 30 (8.5%)                                                               | 26 (8.4%)                                                             |
| Class III obesity, 40.0+                     | 41 (6.2%)                                                               | 21 (5.9%)                                                               | 20 (6.4%)                                                             |
| <b>Waist Circumference (WC)</b>              |                                                                         |                                                                         |                                                                       |
| WC (cm)                                      | 92.2 (17.8), 62.2-180.0                                                 | 87.9 (16.4), 62.2-149.4                                                 | 97.1 (18.2), 64.6-180.0                                               |
| High: 80-88 cm, women; 94-102 cm, men        | 115 (17.7%)                                                             | 60 (17.3%)                                                              | 55 (18.2%)                                                            |
| Very high: $>$ 88 cm, women; $>$ 102 cm, men | 229 (35.3%)                                                             | 146 (42.2%)                                                             | 83 (27.4%)                                                            |
| <b>Blood Pressure (BP)</b>                   |                                                                         |                                                                         |                                                                       |
| Systolic BP (SBP) (mmHg)                     | 115.2 (12.9), 83.7-167.3                                                | 109.5 (11.0), 83.7-153.3                                                | 121.6 (11.8), 84.7-167.3                                              |
| Diastolic BP (DBP) (mmHg)                    | 73.1 (10.2), 45.7-104.0                                                 | 72.4 (10.1), 48.7-99.3                                                  | 73.9 (10.2), 45.7-104.0                                               |
| SBP $\geq$ 130 mmHg or DBP $\geq$ 80 mmHg    | 190 (29.4%)                                                             | 81 (23.6%)                                                              | 109 (35.9%)                                                           |
| <b>Total Cholesterol</b>                     |                                                                         |                                                                         |                                                                       |
| Total cholesterol (mg/dL)                    | 169.1 (33.7), 83-296                                                    | 167.4 (31.7), 85-289                                                    | 171.1 (35.8), 83-296                                                  |

|                                            |                      |                      |                      |
|--------------------------------------------|----------------------|----------------------|----------------------|
| Total cholesterol, $\geq 200$ mg/dL        | 94 (17.8%)           | 44 (15.5%)           | 50 (20.5%)           |
| <b>High-Density Lipoprotein (HDL)</b>      |                      |                      |                      |
| HDL (mg/dL)                                | 53.9 (13.3), 24-106  | 57.2 (12.6), 29-96   | 50.1 (13.1), 24-106  |
| HDL $< 50$ mg/dL, women; $< 40$ mg/dL, men | 131 (24.9%)          | 78 (27.6%)           | 53 (21.7%)           |
| <b>Low-Density Lipoprotein (LDL)</b>       |                      |                      |                      |
| LDL (mg/dL)                                | 97.5 (29.5), 23-223  | 93.6 (27.4), 23-192  | 102.1 (31.2), 26-224 |
| LDL $\geq 130$ mg/dL                       | 70 (13.3%)           | 26 (9.2%)            | 44 (18.0%)           |
| <b>Fasting Triglycerides</b>               |                      |                      |                      |
| Triglycerides (mg/dL)                      | 88.7 (55.8), 27-538  | 83.4 (47.4), 27-393  | 94.8 (63.6), 29-538  |
| Triglycerides, $\geq 150$ mg/dL            | 48 (9.1%)            | 21 (7.4%)            | 27 (11.1%)           |
| <b>Fasting Glucose</b>                     |                      |                      |                      |
| Glucose (mg/dL)                            | 91.5 (18.9), 63-293  | 89.5 (18.1), 63-293  | 93.7 (19.5), 66-273  |
| Glucose $\geq 100$ mg/dL                   | 41 (7.8%)            | 12 (4.2%)            | 29 (11.9%)           |
| <b>Fasting Insulin</b>                     |                      |                      |                      |
| Insulin ( $\mu$ U/mL)                      | 10.0 (8.3), 0.1-70.2 | 10.2 (8.0), 0.6-67.6 | 9.8 (8.6), 0.1-70.2  |
| Insulin $\geq 20$ $\mu$ U/mL               | 43 (8.2%)            | 24 (8.5%)            | 19 (7.8%)            |
| <b>Hemoglobin A1c</b>                      |                      |                      |                      |
| HbA1c (%)                                  | 5.3 (2.3), 0.6-23.3  | 5.3 (2.2), 0.6-17.1  | 5.2 (2.4), 1.3-23.3  |
| HbA1c normal, $< 5.7\%$                    | 355 (67.4%)          | 182 (64.3%)          | 173 (70.9%)          |
| HbA1c prediabetes, 5.7% - 6.4%             | 36 (6.8%)            | 19 (6.7%)            | 17 (7.0%)            |
| HbA1c diabetes, $> 6.4\%$                  | 136 (25.8%)          | 82 (29.0%)           | 54 (22.1%)           |
| <b>C-reactive Protein (CRP)</b>            |                      |                      |                      |
| CRP (mg/L)                                 | 4.5 (4.4), 0.01-21.2 | 5.0 (4.6), 0.01-21.2 | 4.0 (4.0), 0.01-17.8 |
| CRP $\geq 10$ mg/L                         | 65 (12.3%)           | 39 (13.8%)           | 26 (10.7%)           |

†Missing data: 41 participants do not have anthropometric data, 95.1% because they participated in a protocol that did not collect these data and 4.9% for a miscellaneous reason. 58 participants do not have blood pressure data, 94.8% because they participated in a protocol that did not collect these data and 5.2% for a miscellaneous reason. 178 participants do not have blood samples, 86.0% because they participated in a protocol that did not collect these data and 14.0% for a miscellaneous reason (e.g., refused the blood draw, sample thawed in transit). Sources of data: For BMI, 2.3% of values were derived from self-reported height and weight in the 'partial' study protocol and 14.9% of values were derived from measurements taken in the 'self-administered' study protocol. For WC and BP, 15.3% of values were derived from measurements taken in the 'self-administered' protocol. Clinical guidelines: Clinical guidelines were used to code the health status indicators according to the Centers for Disease Control and Prevention (CDC) for BMI, fasting glucose, fasting insulin, and HbA1c; British Heart Foundation (BHF) for WC; American College of Cardiology (ACC) and American Heart Association (AHA) for BP; AHA for total cholesterol, HDL, LDL, and fasting triglycerides; and CDC/AHA for CRP.

Information pertaining to relevant health behaviors that may account for the health status of the sample is described in Table 3. With respect to cigarette smoking, 27.5% of participants identified as current or past smokers. The number of current smokers (14.9%) was comparable to national estimates (i.e., 14.1%) among similar-age individuals (25-44 years) as was the pattern of smoking between women and men (13.0% vs. 17.1%, respectively) with men more likely to smoke.[53] Based on 24-hour diet recalls, the Healthy Eating Index-2015 (HEI-2015)[39], a marker of diet quality reflecting the degree of alignment with dietary guidelines, was low (mean HEI-2015=50.2) as compared to an ideal score of 100, indicating complete alignment with dietary guidelines. This value was also lower than national estimates (i.e., 53 between 19-30 years and 58 between 31-59 years), but in line with the poor diets of Americans in general.[39] In parallel, intake of fruits and vegetables was low with only 6.9% and 17.9%, respectively, meeting the daily recommendation for intake in these food

groups. This is also in line with the low intake of fruits (i.e., 12.3%) and vegetables (i.e., 10.0%) in the US population.[54] Finally, using actigraphy, patterns of activity and sleep were examined. On average, the time engaged in moderate, vigorous, or very vigorous activity was 1.3 hours/day while sedentary time was 4.5 hours/day with only 15.9% of participants walking 10,000+ steps per day. On average, the participants slept 7.3 hours/night, 38.6% slept less than the recommended 7-9 hours of sleep/night, and 41.0% had sleep efficiency scores <85%, indicating disrupted sleep. Moreover, the global PSQI[41] showed 45.6% had a score of six or greater, reflecting significant sleep problems. In sum, inspection of the health behavior indicators in the sample revealed a general pattern of behaviors related to poor dietary habits, low levels of activity, and disrupted sleep which tracks and may explain the poor health status of the sample on parameters of cardiometabolic risk.

Table 3. Description of health behavior indicators in the full sample and in women and men separately.

|                                     | <b>Total<sup>†</sup></b><br><b>(n=705)</b><br><i>N (%) or mean (SD), range</i> | <b>Women<sup>†</sup></b><br><b>(n=378)</b><br><i>N (%) or mean (SD), range</i> | <b>Men<sup>†</sup></b><br><b>(n=327)</b><br><i>N (%) or mean (SD), range</i> |
|-------------------------------------|--------------------------------------------------------------------------------|--------------------------------------------------------------------------------|------------------------------------------------------------------------------|
| <b>Smoking:</b>                     |                                                                                |                                                                                |                                                                              |
| Current                             | 104 (14.9%)                                                                    | 49 (13.0%)                                                                     | 55 (17.1%)                                                                   |
| Current cigarettes/day              | 7.5 (6.3), <1-20                                                               | 7.1 (5.5), <1-20                                                               | 7.9 (7.0), <1-20                                                             |
| Past                                | 88 (12.6%)                                                                     | 25 (6.6%)                                                                      | 63 (19.5%)                                                                   |
| Past cigarettes/day                 | 7.9 (8.3), <1-45                                                               | 5.8 (4.9), <1-15                                                               | 8.7 (9.2), <1-45                                                             |
| Age last quit (in years)            | 24.6 (3.2), 12-29                                                              | 25.0 (3.2), 19-29                                                              | 24.5 (3.2), 12-29                                                            |
| Current/past                        | 192 (27.5%)                                                                    | 74 (19.6%)                                                                     | 118 (36.6%)                                                                  |
| Never                               | 507 (72.5%)                                                                    | 303 (80.4%)                                                                    | 204 (63.4%)                                                                  |
| <b>24-Hour Diet Recall:</b>         |                                                                                |                                                                                |                                                                              |
| Health Eating Index-2015 (HEI-2015) | 50.2 (11.0), 22.4-86.7                                                         | 51.3 (10.9), 22.7-86.7                                                         | 49.0 (11.0), 22.4-84.3                                                       |
| Vegetable, cup equivalents          | 1.8 (1.1), 0.0-6.8                                                             | 1.8 (1.0), 0.0-6.8                                                             | 1.9 (1.1), 0.2-5.7                                                           |
| Fruit, cup equivalents              | 0.7 (0.8), 0.0-10.5                                                            | 0.7 (0.7), 0.0-4.3                                                             | 0.7 (1.0), 0.0-10.5                                                          |
| Vegetable, meets daily guideline*   | 119 (17.9%)                                                                    | 74 (21.0%)                                                                     | 45 (14.5%)                                                                   |
| Fruit, meets daily guideline*       | 46 (6.9%)                                                                      | 24 (6.8%)                                                                      | 22 (7.1%)                                                                    |
| <b>Actigraphy, Activity Level:*</b> |                                                                                |                                                                                |                                                                              |
| Very vigorous activity (min/day)    | 2.1 (4.7), 0.0-35.9                                                            | 2.0 (4.2), 0.0-33.0                                                            | 2.2 (5.2), 0.0-35.9                                                          |
| Vigorous activity (min/day)         | 8.9 (16.7), 0.0-177.5                                                          | 8.7 (15.9), 0.0-117.0                                                          | 9.1 (17.7), 0.0-177.5                                                        |
| Moderate activity (min/day)         | 65.0 (44.0), 1.8-333.2                                                         | 61.5 (42.0), 8.7-308.3                                                         | 69.3 (46.0), 1.8-333.2                                                       |
| Number of steps per day             | 7,368.9 (2,782.8),<br>1,233.9-16,330.6                                         | 7,189.7 (2,546.6),<br>1,692.4-16,330.6                                         | 7,579.8 (3,028.7),<br>1,233.9-15,656.7                                       |
| Number of steps 10,000+             | 92 (15.9%)                                                                     | 38 (12.1%)                                                                     | 54 (20.3%)                                                                   |
| Sedentary time (min/day)            | 271.2 (108.6), 23.7-609.3                                                      | 252.8 (98.5), 31.3-609.3                                                       | 292.8 (115.9), 23.7-604.5                                                    |
| <b>Actigraphy, Sleep:*</b>          |                                                                                |                                                                                |                                                                              |
| Sleep efficiency*                   | 85.0 (6.1), 52.8-97.3                                                          | 85.2 (5.6), 61.1-97.3                                                          | 84.7 (6.7), 52.8-97.1                                                        |
| Sleep efficiency <85%               | 238 (41.0%)                                                                    | 123 (38.8%)                                                                    | 115 (43.6%)                                                                  |
| Total sleep time (hours)            | 7.3 (1.0), 4.0-11.7                                                            | 7.5 (1.0), 4.5-11.7                                                            | 7.0 (1.0), 4.0-10.2                                                          |
| Sleep <7 hours                      | 224 (38.6%)                                                                    | 94 (29.7%)                                                                     | 130 (49.2%)                                                                  |
| Number of awakenings                | 19.8 (7.4), 2.2-48.3                                                           | 19.7 (7.2), 2.2-47.0                                                           | 19.8 (7.7), 3.0-48.3                                                         |

|                                          |                      |                      |                       |
|------------------------------------------|----------------------|----------------------|-----------------------|
| Average awakening length (min)           | 3.7 (1.4), 1.3-13.4  | 3.7 (1.2), 1.3-8.5   | 3.7 (1.6), 1.6-13.4   |
| Sleep fragmentation*                     | 30.1 (8.9), 7.0-69.8 | 29.1 (7.7), 9.8-59.1 | 31.3 (10.1), 7.0-69.8 |
| <b>Self-report, Sleep</b>                |                      |                      |                       |
| PSQI Global Sleep Quality Index          | 5.8 (3.3), 0-18      | 5.9 (3.5), 0-18      | 5.7 (3.1), 0-16       |
| PSQI Global Sleep Quality Index $\geq 6$ | 319 (45.6%)          | 180 (47.6%)          | 139 (43.2%)           |

Abbreviations: PSQI=Pittsburgh Sleep Quality Index.[41]

<sup>†</sup>Missing data: 6 participants did not complete the questionnaire items pertaining to smoking or sleep. 41 participants do not have diet data, 95.1% because they participated in a protocol that did not collect these data and 4.9% for a miscellaneous reason. 124 participants do not have actigraphy data, 31.5% because they participated in a protocol that did not collect these data and 68.5% for a miscellaneous reason (e.g., did not wear monitor for sufficient length of time).

\*Definitions: For vegetables, the daily guideline of 2.5 cups was used for women based on a 2000 calorie diet and the daily guideline of 3.0 cups was used for men based on a 2400 calorie diet. For fruit, the daily guideline of 2.0 cups of fruit was used for both women and men as the recommendation for fruit does not differ between 2000 and 2400 calorie diets. For actigraphy for both activity and sleep indicators, a minimum wear time of 2 days and nights was required. Sleep efficiency is the number of minutes asleep divided by the number of minutes in bed. Sleep fragmentation is an index of restlessness during sleep derived from movement.

In summary, in descriptive analyses, findings to date revealed that the sample was well-educated and growing in their educational attainment as 13.6% were current students. Despite this, the sample showed considerable risk on health status indicators, especially related to obesity, hypertension, and diabetes. Of particular concern, the prevalence of hypertension and pre-diabetes and diabetes exceeded national estimates in similar-age individuals. The examination of health behavior indicators generally tracked with the parameters of poor health status, showing a pattern of poor diet, low activity, and disrupted sleep. The juxtaposition of the sample's relatively young age (26-31 years) and high educational status (55.6% college educated or greater) with its poor health status may suggest a dissociation between health and factors that are typically health protective. This is consistent with observed population health trends, which show a worsening of cardiometabolic health status in younger generations of Americans, especially among Millennials,[55] the generation to which the current sample (born in 1991) belongs.

## STRENGTHS AND LIMITATIONS

A primary strength of the current study, SHINE, was its leveraging of the original NICHD SECCYD to extend and maximize the value of this longitudinal birth cohort. The addition of adulthood measures of health allows innumerable opportunities for the pursuit of life course research relating early life environments to adulthood health and disease risk. Additional strengths include the gold standard methods that were used for the measurement of each health status and health behavior indicator. Extensive recruitment methods were also used to engage participants living in different locations throughout the US and adaptations to the study procedures were developed (e.g., 'self-administered' study protocol) to allow flexibility with participation. Taken together, these approaches balanced the standards of high-quality research with the imperative to reach

1  
2  
3 participants in distant locations and to reduce barriers to participation, including during the challenging times of  
4 the COVID-19 pandemic.  
5

6 There were also several limitations in the current study. Of the 1364 families that participated in the  
7 original NICHD SECCYD, only 927 (68.0%) adult children were available for inclusion in the current study based  
8 on their prior consent to be re-contacted, as well as five having died. Of this number, 705 (76.1%) participated in  
9 the current SHINE study. Analyses showed retention in SHINE was predicted by higher maternal education at  
10 birth ( $b=.152, p<.001$ ), but not income-to-needs ratio at birth ( $b=-.007, p=.779$ ), with a 16% increase in the odds  
11 of retention among participants with more highly educated mothers. This pattern of greater educational  
12 attainment was also observed among the now adult children and will need to be considered when interpreting  
13 future study findings. Another pattern observed in the current study was that more women than men  
14 participated despite efforts to target men specifically. In addition, the nature of the study required that data  
15 collection teams work in the field to implement the study protocols. In this context, the numerous staff persons,  
16 distance from the participants, and varied data collection environments made oversight by the UW team an on-  
17 going challenge. A related issue concerns the remote protocols that by definition were administered with less  
18 oversight by the UW team. However, as described above, numerous training and quality assurance measures  
19 were implemented to ensure fidelity across all the study protocols. Finally, the data collection for the study  
20 occurred between 2018 and 2022, overlapping with the height of the COVID-19 pandemic. In addition to the  
21 challenges of conducting in-person research during the pandemic, the pandemic itself may have had differential  
22 impacts on participants who participated during this period and should also be considered when interpreting  
23 future study findings.  
24  
25  
26  
27  
28  
29  
30  
31  
32  
33  
34  
35  
36  
37

### 38 **FUTURE PLANS**

39  
40 The current study lays the groundwork for future analyses relating early life environments to adulthood  
41 health and disease risk. Within this broad framework, two specific areas of inquiry will be pursued initially. First,  
42 building on a large literature describing the graded relationship between socioeconomic status and health,[56-  
43 59] an in-depth examination is planned to delineate the specific features of educational attainment that are  
44 health protective. This objective stems from a National Institutes of Health (NIH) initiative to support research  
45 that 'further elucidates the pathways involved in the relationship between education and health outcomes and  
46 to identify the specific aspects and qualities of education that are responsible for this relationship'.[60] The  
47 current study is well positioned to contribute to this area by testing links between key aspects of education in  
48 early life, such as childhood academic skills and classroom experiences, and childhood health concurrently as  
49 well as adulthood health prospectively. In addition, this work will consider the potential moderating role of  
50  
51  
52  
53  
54  
55  
56  
57

1  
2  
3 education in offsetting early childhood adversity experiences as well as other contributing factors such as high-  
4 quality childcare, parental education, and child intelligence and temperament.  
5  
6  
7

8           Second, building on a large literature examining early life adversity exposures and poor health,[9-14] an  
9 in-depth examination is planned that focuses on the potential mediating role of growth and pubertal  
10 development trajectories in accounting for early life adversity effects on adulthood cardiometabolic health.[61-  
11 63] This objective also stems from an NIH initiative to support research that identifies specific vulnerability  
12 factors and mechanisms by which early life adversity exposures transmit risk for poor health.[64] The current  
13 study is well positioned to contribute to this area by testing empirically the mechanistic role of pubertal  
14 development in a single longitudinal data set, thereby integrating previously separate literatures 1) relating early  
15 life adversity to earlier and faster rates of pubertal maturation[65-69] and 2) relating earlier pubertal maturation  
16 to poor cardiometabolic outcomes.[70-75] This work will also consider concurrent trajectories of prepubertal  
17 weight gain, relevant health behaviors, and resilience factors. For both main areas of inquiry, the many strengths  
18 of the original NICHD SECCYD and recent SHINE data collection will allow testing of these life course models with  
19 adequate accounting of covariates and alternative explanatory factors and will overcome common challenges  
20 present in these literatures, including long latency periods between the exposures and outcomes of interest as  
21 well as poor integration of relevant developmental and epidemiologic approaches.  
22  
23  
24  
25  
26  
27  
28  
29  
30  
31  
32

### 33 **CONTEXT**

34  
35           The original NICHD SECCYD and recent SHINE data collection may be placed in the larger landscape of  
36 cohort studies around the globe. Great Britain initiated the first National Birth Cohort studies (1946, 1958, and  
37 1970) followed more recently by the Avon Longitudinal Study of Parents and Children (ALSPAC, 1991) and the  
38 United Kingdom Millennium Cohort Study (MCS, 2000).[76] In the US, the National Longitudinal Surveys (NLSY,  
39 1979, 1986, 1997) and the Early Childhood Longitudinal Study (ECLS, 1998) were launched later as were efforts  
40 such as the Minnesota Twin Family Study (MTFS, 1989) and the Adolescent Brain and Cognitive Development  
41 study (ABCD, 2015). Other notable cohort studies include the Dunedin Multidisciplinary Health and  
42 Development Study (Dunedin Study, 1979) in New Zealand and the Mater-University of Queensland Study of  
43 Pregnancy in Australia (MUSP, 1981).  
44  
45  
46  
47  
48  
49

50           Each of these studies, unique in time, place, and scope, reflects the value of the longitudinal cohort  
51 design in which causal inferences may be drawn between exposures and their impacts in areas of child health  
52 and development. On the other hand, common challenges emerge, including problems with selective attrition  
53 and sample representativeness, the maintenance of long-term funding, and the accommodation of new lines of  
54  
55  
56  
57  
58  
59  
60

1  
2  
3 research into the existing study.[76] In context, the NICHD SECCYD/SHINE follow-up is generally smaller in size  
4 compared to other cohorts and even at its inception was not population-based. Rather, recruitment parameters  
5 ensured participants represented the geographies of their respective locations including across urban and rural  
6 settings. Additionally, problems with attrition have been experienced. In contrast, relative strengths of the  
7 NICHD SECCYD/SHINE follow-up include its depth of measurement, which is unique compared to other cohorts,  
8 including, for example, multi-method assessments of attachment, Tanner staging of pubertal development, and  
9 the current gold standard measures of health status and health behaviors.  
10  
11  
12  
13  
14  
15

## 16 **COLLABORATION**

17  
18 Data and materials from the NICHD SECCYD are available online[77]:  
19 [icpsr.umich.edu/web/ICPSR/series/233](http://icpsr.umich.edu/web/ICPSR/series/233). Researchers interested in working with the team of investigators who  
20 led the SHINE follow-up data collection are invited to contact MEB and GIR. Potential collaborative efforts will be  
21 considered under specific conditions, including, but not limited to, the proposed scope of work and assurances  
22 related to data security and integrity.  
23  
24  
25  
26  
27

## 28 **CONCLUSIONS**

29  
30 The landmark NICHD SECCYD, as described above, is a unique resource that has supported research in  
31 diverse areas of child health and well-being since its inception in 1991. With the addition of the follow-up data  
32 collection—SHINE, through which the health status of the now adult participants has been characterized, new  
33 opportunities to test life course models linking early life environments to adulthood health and disease risk have  
34 emerged. These opportunities are timely given the wealth of evidence suggesting the origins of adulthood  
35 health begin in childhood as well as the growing imperative to move toward prevention focused efforts to  
36 reverse worsening US population health trends. The initial examination of these newly available data reveals a  
37 distinct pattern of poor health, especially relating to obesity, hypertension, and diabetes. This pattern was  
38 observed despite the relatively young age and high educational status of the sample but is consistent with  
39 findings suggesting the health of younger generations of Americans is worsening, as evidenced by comparisons  
40 to the health of their same-age counterparts from older generations. With the adulthood health measures now  
41 in place, the next steps for this work will entail leveraging the uniquely robust measures collected as a part of  
42 the original NICHD SECCYD to pinpoint specific early life risk and resilience factors as well as the correlates and  
43 potential mechanisms accounting for variability in trajectories of health and disease risk in the period of young  
44 adulthood. In addition, the work of the current study is discussed with an emphasis on lessons that were learned  
45  
46  
47  
48  
49  
50  
51  
52  
53  
54  
55  
56  
57  
58  
59  
60



1  
2  
3 conducting in-person, health focused research among participants living in distant locations throughout the US  
4 and in a period overlapping with the COVID-19 pandemic.  
5  
6  
7  
8  
9  
10  
11  
12  
13  
14  
15  
16  
17  
18  
19  
20  
21  
22  
23  
24  
25  
26  
27  
28  
29  
30  
31  
32  
33  
34  
35  
36  
37  
38  
39  
40  
41  
42  
43  
44  
45  
46  
47  
48  
49  
50  
51  
52  
53  
54  
55  
56  
57  
58  
59  
60

For peer review only

1  
2  
3 **Contributors:** MEB led the conceptualization and writing of this manuscript with assistance with data cleaning  
4 and analysis from AST and WSY. MEB, GIR, SEG, BMA, RAH, RCP, ALM, GMS, AST, WSY, CBL participated in the  
5 execution of the SHINE data collection and all authors collaborated on the conceptualization, writing, and critical  
6 review of this manuscript.  
7  
8

9  
10 **Funding:** This work was supported by the *Eunice Kennedy Shriver* National Institute of Child Health and Human  
11 Development (U10HD025447, R01HD091132) and the National Heart, Lung, and Blood Institute (R01HL130103)  
12 at the National Institutes of Health.  
13

14 **Competing Interests:** None declared.  
15  
16  
17  
18  
19  
20  
21  
22  
23  
24  
25  
26  
27  
28  
29  
30  
31  
32  
33  
34  
35  
36  
37  
38  
39  
40  
41  
42  
43  
44  
45  
46  
47  
48  
49  
50  
51  
52  
53  
54  
55  
56  
57  
58  
59  
60

For peer review only

**Acknowledgements:**

We would like to recognize the important contributions of the large investigative team dedicated to the high-quality data collection of the SECCYD follow-up, SHINE. In addition to the lead investigators and co-investigators identified as co-authors, the internal UW research team included Rebecca Christopf, Madalyn Osbourne, Hailey Hagins, and Linda Nzabamwita. The in-field data collectors and phlebotomists included Damara Acosta, Taylor Haase, Connie Showalter, Mary Koller, Khamia Powell, Rochelle Eskridge, Megan Buss, Kay Harrington, Amanda O'Brien, Angie Mondestin, Leah Welker, Karen Nowden, Emily Goodrum, Tracey Pinkney, Libby Shook, Kelsey Smith, Danielle Heusted, and Kristen Roynesdal. The laboratory work was conducted by the UW Research Testing Services; the UW School of Nursing Biobehavioral Lab Testing and Education Core (Ernie Tolentino); the UVA Center for Research in Reproduction Ligand Assay and Analysis Core, supported by NIH/NICHD R24 HD102061; and the UW Center for Studies in Demography & Ecology (Eleanor Brindle, Melanie Martin, Carmen Hove, and Maia Kent), supported by NIH/NICHD P2C HD042828. Questionnaire administration was conducted using REDCap, supported by the UW Institute of Translational Health Sciences, NIH/NCATS UL1 TR002319. Additional support was provided to George Slavich (#OPR21101) from the California Governor's Office of Planning and Research/California Initiative to Advance Precision Medicine.

**Patient and public involvement:** None.

**Patient consent for publication:** Not required.

**Ethics approval:** Informed consent for the NICHD SECCYD follow-up study, SHINE, was obtained from the target participants. The research was approved by the Human Subjects Division of the University of Washington (STUDY00001821).

**Provenance and peer review:** Not commissioned; externally peer reviewed.

**Data availability statement:** Data and materials from the NICHD SECCYD are available online: [icpsr.umich.edu/web/ICPSR/series/233](http://icpsr.umich.edu/web/ICPSR/series/233). Researchers interested in working with the team of investigators who led the SHINE follow-up data collection are invited to contact MEB and GIR. Potential collaborative efforts will be considered under specific conditions, including, but not limited to, the proposed scope of work and assurances related to data security and integrity.

**Open access:** This is an open access article distributed in accordance with the Creative Commons Attribution Non Commercial (CC BY-NC 4.0) license, which permits others to distribute, remix, adapt, build upon this work non-commercially, and license their derivative works on different terms, provided the original work is properly cited, appropriate credit is given, any changes made indicated, and the use is non-commercial. See: <http://creativecommons.org/licenses/by-nc/4.0/>.

## REFERENCES

1. NICHD Early Child Care Research Network. *Child care and child development: Results from The NICHD Study of Early Child Care and Youth Development*. 2005: Guilford Press.
2. NICHD Early Child Care Research Network. *The effects of infant child care on infant-mother attachment security: Results of the NICHD Study of Early Child Care*. *Child Dev*, 1997. **68**(5): p. 860-879.
3. NICHD Early Child Care Research Network. *Early child care and children's development prior to school entry: Results from the NICHD Study of Early Child Care*. *Am Educ Res J*, 2002. **39**(1): p. 133-164.
4. NICHD Early Child Care Research Network. *Early child care and children's development in the primary grades: Results from the NICHD Study of Early Child Care*. *Am Educ Res J*, 2005. **43**: p. 537-570.
5. Belsky, J., et al., *Are there long-term effects of early child care?* *Child Dev*, 2007. **78**(2): p. 681-701.
6. Vandell, D.L., et al., *Do effects of early child care extend to age 15 years? Results from The NICHD Study of Early Child Care and Youth Development*. *Child Dev*, 2010. **81**(3): p. 737-56.
7. Dagan, O., et al., *Does secure base script knowledge mediate associations between observed parental caregiving during childhood and adult romantic relationship quality and health?* *Attach Hum Dev*, 2021. **23**(5): p. 643-664.
8. Kunkel, J.J., et al., *Early maternal sensitivity and markers of physical health: Enduring or transient associations from childhood to adulthood?* *Dev Psychol*, 2022. **58**(12): p. 2252-2263.
9. Suglia, S.F., et al., *Childhood and adolescent adversity and cardiometabolic outcomes: A Scientific Statement from the American Heart Association*. *Circulation*, 2018. **137**(5): p. e15-e28.
10. Suglia, S.F., et al., *Social determinants of cardiovascular health: Early life adversity as a contributor to disparities in cardiovascular diseases*. *The Journal of Pediatrics*, 2020.
11. Suglia, S.F., et al., *Timing, duration, and differential susceptibility to early life adversities and cardiovascular disease risk across the lifespan: Implications for future research*. *Prev Med*, 2021. **153**: p. 106736.
12. Berens, A.E., S.K.G. Jensen, and C.A. Nelson, *Biological embedding of childhood adversity: From physiological mechanisms to clinical implications*. *BMC Med*, 2017. **15**(1): p. 135.
13. Shonkoff, J.P. and A.S. Garner, *The lifelong effects of early childhood adversity and toxic stress*. *Pediatrics*, 2012. **129**(1): p. e232-46.
14. Su, S., et al., *The role of adverse childhood experiences in cardiovascular disease risk: A review with emphasis on plausible mechanisms*. *Curr Cardiol Rep*, 2015. **17**(10): p. 88.
15. Galobardes, B., J.W. Lynch, and G.D. Smith, *Childhood socioeconomic circumstances and cause-specific mortality in adulthood: Systematic review and interpretation*. *Epidemiologic Reviews*, 2004. **26**: p. 7-21.

16. Galobardes, B., J.W. Lynch, and G.D. Smith, *Is the association between childhood socioeconomic circumstances and cause-specific mortality established? Update of a systematic review*. Journal of Epidemiology and Community Health, 2008. **62**(5): p. 387-390.
17. Galobardes, B., G.D. Smith, and J.W. Lynch, *Systematic review of the influence of childhood socioeconomic circumstances on risk for cardiovascular disease in adulthood*. Annals of Epidemiology, 2006. **16**(2): p. 91-104.
18. Midei, A.J. and K.A. Matthews, *Interpersonal violence in childhood as a risk factor for obesity: a systematic review of the literature and proposed pathways*. Obesity Reviews, 2011. **12**(501): p. e159-e172.
19. Midei, A.J., et al., *Childhood physical abuse is associated with incident metabolic syndrome in mid-life women*. Health Psychology, 2013. **32**(2): p. 121-127.
20. Wegman, H.L. and C. Stetler, *A meta-analytic review of the effects of childhood abuse on medical outcomes in adulthood*. Psychosomatic Medicine, 2009. **71**(8): p. 805-812.
21. Johnson, W.F., et al., *Childhood abuse and neglect and physical health at midlife: Prospective, longitudinal evidence*. Dev Psychopathol, 2017. **29**(5): p. 1935-1946.
22. Farrell, A.K., et al., *Early maternal sensitivity, attachment security in young adulthood, and cardiometabolic risk at midlife*. Attach Hum Dev, 2019. **21**(1): p. 70-86.
23. Young, E.S., et al., *The dual impact of early and concurrent life stress on adults' diurnal cortisol patterns: A prospective study*. Psychological Science, 2019. **30**(5): p. 739-747.
24. Young, E.S., et al., *Life stress and cortisol reactivity: An exploratory analysis of the effects of stress exposure across life on HPA-axis functioning*. Dev Psychopathol, 2021. **33**(1): p. 301-312.
25. Anderson, G.F., et al., *Health spending and outcomes: Trends in OECD countries, 1960-1998*. Health Affairs, 2000. **19**(3): p. 150-157.
26. Anderson, G.F., et al., *It's the prices, stupid: Why the United States is so different from other countries*. Health Affairs, 2003. **22**(3): p. 89-105.
27. Papanicolas, I., L.R. Woskie, and A.K. Jha, *Health care spending in the United States and other high-income countries*. Jama-Journal of the American Medical Association, 2018. **319**(10): p. 1024-1039.
28. Carey, V.J., et al., *Body fat distribution and risk of non-insulin-dependent diabetes mellitus in women - The Nurses' Health Study*. American Journal of Epidemiology, 1997. **145**(7): p. 614-619.
29. Janssen, I., P.T. Katzmarzyk, and R. Ross, *Body mass index, waist circumference, and health risk*. Archives of Internal Medicine, 2002. **162**(18): p. 2074-2079.

- 1  
2  
3 30. Lapidus, L., et al., *Distribution of adipose tissue and risk of cardiovascular disease and death: A 12-year*  
4 *follow-up of participants in the Population Study of Women in Gothenburg, Sweden*. British Medical  
5 Journal, 1984. **289**(6454): p. 1257-1261.  
6  
7  
8 31. Dieleman, J.L., et al., *US spending on personal health care and public health, 1996-2013*. Jama-Journal of  
9 the American Medical Association, 2016. **316**(24): p. 2627-2646.  
10  
11 32. Martin, A.B., et al., *National health spending: Faster growth In 2015 as coverage expands and utilization*  
12 *increases*. Health Affairs, 2017. **36**(1): p. 166-176.  
13  
14 33. Booth-LaForce, C., et al., *Caregiving and contextual sources of continuity and change in attachment*  
15 *security from infancy to late adolescence*. Monogr Soc Res Child Dev, 2014. **79**(3): p. 67-84.  
16  
17 34. Ansari, A., T.L. Hofkens, and R.C. Pianta, *Absenteeism in the first decade of education forecasts civic*  
18 *engagement and educational and socioeconomic prospects in young adulthood*. J Youth Adolesc, 2020.  
19 **49**(9): p. 1835-1848.  
20  
21 35. Nivison, M.D., et al., *Convergent and discriminant validity of retrospective assessments of the quality of*  
22 *childhood parenting: prospective evidence From infancy to Age 26 years*. Psychol Sci, 2021. **32**(5): p. 721-  
23 734.  
24  
25 36. Bustamante, A.S., et al., *Adult outcomes of sustained high-quality early child care and education: Do they*  
26 *vary by family income?* Child Dev, 2022. **93**(2): p. 502-523.  
27  
28 37. *University of Washington Policies, Procedures, and Guidance. Guidance on Human Subjects Regulations.*  
29 <https://www.washington.edu/research/policies/guidance-human-subjects-regulations-2/>. [cited 2022].  
30  
31 38. *National Cancer Institute, Division of Cancer Control & Population Sciences, Automated Self-Administered*  
32 *24-Hour (ASA24) Dietary Assessment Tool*. Available: <https://epi.grants.cancer.gov/asa24> [Accessed July  
33 2022].  
34  
35 39. *US Department of Agriculture, Food and Nutrition Service, Healthy Eating Index*. Available:  
36 <https://www.fns.usda.gov/healthy-eating-index-hei> [Accessed July 2022].  
37  
38 40. *The Dietary Screener Questionnaire (DSQ) in the NHANES 2009-10: Data Processing and Scoring Procedure*  
39 *for Earlier methods*. Epidemiology and Genomics Research Program. National Cancer Institute.  
40 <https://epi.grants.cancer.gov/diet/screeners/files>. Updated April 2, 2019. .  
41  
42 41. Buysse, D.J., et al., *The Pittsburgh Sleep Quality Index: a new instrument for psychiatric practice and*  
43 *research*. Psychiatry Res, 1989. **28**(2): p. 193-213.  
44  
45 42. Cohen, S., T. Kamarck, and R. Mermelstein, *A global measure of perceived stress*. J Health Soc Behav, 1983.  
46 **24**(4): p. 385-96.  
47  
48  
49  
50  
51  
52  
53  
54  
55  
56  
57  
58  
59  
60

- 1  
2  
3 43. Slavich, G.M. and G.S. Shields, *Assessing Lifetime Stress Exposure Using the Stress and Adversity Inventory for Adults (Adult STRAIN): An Overview and Initial Validation*. *Psychosom Med*, 2018. **80**(1): p. 17-27.
- 4  
5  
6 44. Radloff, L.S., *The CES-D Scale: A self-report depression scale for research in the general population*. *Applied Psychological Measurement Vol 1*(3) Sum 1977, 385-401, 1977.
- 7  
8  
9  
10 45. Achenbach, T.M. and L.A. Rescorla, *Manual for the ASEBA Adult Forms & Profiles*. Research Center for Children, Youth, & Families. 2003, Burlington, VT, USA: University of Vermont.
- 11  
12  
13 46. Spanier, G.B., *Measuring dyadic adjustment: New scales for assessing the quality of marriage and similar dyads*. *Journal of Marriage and the Family*, 1976. **38**(1): p. 15-28.
- 14  
15  
16 47. Fraley, R.C., et al., *The Experiences in Close Relationships-Relationship Structures questionnaire: a method for assessing attachment orientations across relationships*. *Psychol Assess*, 2011. **23**(3): p. 615-25.
- 17  
18  
19 48. U.S. Census Bureau. *Educational Attainment in the United States: 2019. Table 3. Detailed Years of School Completed by People 25 Years and Over by Sex, Age Groups, Race and Hispanic Origin: 2019*. Available: <https://www.census.gov/content/census/en/data/tables/2019/demo/educational-attainment/cps-detailed-tables.html> [Accessed July 2022].
- 20  
21  
22  
23  
24  
25  
26 49. National Center for Health Statistics, *National Health Interview Survey, Prevalence of obesity among adults aged 20 and over, by age group and sex: United States, 2018*. Available: [https://public.tableau.com/app/profile/nhis/viz/FIGURE6\\_2/Dashboard6\\_2](https://public.tableau.com/app/profile/nhis/viz/FIGURE6_2/Dashboard6_2) [Accessed July 2022].
- 27  
28  
29  
30  
31 50. National Health and Nutrition Examination Survey 2017–March 2020 Prepandemic Data Files Development of Files and Prevalence Estimates for Selected Health Outcomes, S. National Center for Health, Editor. 2021, <http://dx.doi.org/10.15620/cdc:106273>: Hyattsville, MD.
- 32  
33  
34  
35  
36 51. National Center for Health Statistics, *National Health and Nutrition Examination Survey, 2017-2018*, Available: [https://www.cdc.gov/nchs/about/factsheets/factsheet\\_nhanes.htm](https://www.cdc.gov/nchs/about/factsheets/factsheet_nhanes.htm) [Accessed July 2022].
- 37  
38  
39  
40 52. Centers for Disease Control and Prevention. *National Diabetes Statistics Report, 2020*. Atlanta, GA, Available: <https://www.cdc.gov/diabetes/pdfs/data/statistics/national-diabetes-statistics-report.pdf> [Accessed July 2022].
- 41  
42  
43  
44  
45 53. Cornelius, M.E., et al., *Tobacco product use among adults - United States, 2020*. *MMWR Morb Mortal Wkly Rep*, 2022. **71**(11): p. 397-405.
- 46  
47  
48 54. Lee, S.H., et al., *Adults meeting fruit and vegetable intake recommendations - United States, 2019*. *MMWR Morb Mortal Wkly Rep*, 2022. **71**(1): p. 1-9.
- 49  
50  
51  
52 55. BlueCross BlueShield *The Health Of America, The Health of Millennials, April 24, 2019, A Focus on Millennial Health Trends*. Available: [https://www.bcbs.com/sites/default/files/file-attachments/health-of-america-report/HOA-Millennial\\_Health\\_0.pdf](https://www.bcbs.com/sites/default/files/file-attachments/health-of-america-report/HOA-Millennial_Health_0.pdf) [Accessed July 2022].
- 53  
54  
55  
56  
57

- 1  
2  
3 56. Adler, N.E., et al., *Socioeconomic status and health. The challenge of the gradient*. Am Psychol, 1994. **49**(1):  
4 p. 15-24.  
5  
6 57. Adler, N.E. and A.C. Snibbe, *The role of psychosocial processes in explaining the gradient between*  
7 *socioeconomic status and health*. Current Directions in Psychological Science, 2003. **12**(4): p. 119-123.  
8  
9 58. Marmot, M., *Social determinants of health inequalities*. Lancet, 2005. **365**(9464): p. 1099-104.  
10  
11 59. Marmot, M.G., et al., *Health inequalities among British civil servants: the Whitehall II study*. Lancet, 1991.  
12 **337**(8754): p. 1387-93.  
13  
14 60. *National Institutes of Health (NIH), Pathways Linking Education to Health*. Available:  
15 <https://grants.nih.gov/grants/guide/rfa-files/RFA-OB-03-001.html> [Accessed July 2022].  
16  
17 61. Bleil, M.E., et al., *Childhood adversity and pubertal timing: Understanding the origins of adulthood*  
18 *cardiovascular risk*. Biol Psychol, 2013. **93**(1): p. 213-9.  
19  
20 62. Bleil, M.E., et al., *Patterns of early life weight gain and female onset of puberty*. J Endocr Soc, 2021. **5**(12):  
21 p. bvab165.  
22  
23 63. Bleil, M.E., et al., *Early life adversity and pubertal timing: Implications for cardiometabolic health*. J Pediatr  
24 Psychol, 2021. **46**(1): p. 36-48.  
25  
26 64. *National Institutes of Health (NIH), Pathways and Mechanisms Linking Early Life Adversities (ELAs) and*  
27 *Adulthood Health Outcomes*. Available: [https://www.nia.nih.gov/research/dbsr/pathways-and-](https://www.nia.nih.gov/research/dbsr/pathways-and-mechanisms-linking-early-life-adversities-elas-and-adult-health-outcomes)  
28 [mechanisms-linking-early-life-adversities-elas-and-adult-health-outcomes](https://www.nia.nih.gov/research/dbsr/pathways-and-mechanisms-linking-early-life-adversities-elas-and-adult-health-outcomes) [Accessed July 2022].  
29  
30 65. Hamlat, E.J., et al., *Effects of early life adversity on pubertal timing and tempo in black and white girls: The*  
31 *National Growth and Health Study*. Psychosom Med, 2022. **84**(3): p. 297-305.  
32  
33 66. Belsky, J., R.M. Houts, and R.M.P. Fearon, *Infant attachment security and the timing of puberty: Testing*  
34 *an evolutionary hypothesis*. Psychological Science, 2010. **21**(9): p. 1195-1201.  
35  
36 67. Belsky, J., et al., *Family rearing antecedents of pubertal timing*. Child Development, 2007. **78**(4): p. 1302-  
37 1321.  
38  
39 68. Deardorff, J., et al., *Socioeconomic status and age at menarche: an examination of multiple indicators in*  
40 *an ethnically diverse cohort*. Annals of Epidemiology, 2014. **24**(10): p. 727-733.  
41  
42 69. Hiatt, R.A., et al., *Childhood socioeconomic position and pubertal onset in a cohort of multiethnic girls:*  
43 *Implications for breast cancer*. Cancer Epidemiology Biomarkers & Prevention, 2017. **26**(12): p. 1714-1721.  
44  
45 70. Frontini, M.G., S.R. Srinivasan, and G.S. Berenson, *Longitudinal changes in risk variables underlying*  
46 *metabolic syndrome X from childhood to young adulthood in female subjects with a history of early*  
47 *menarche: The Bogalusa Heart Study*. International Journal of Obesity, 2003. **27**(11): p. 1398-1404.  
48  
49  
50  
51  
52  
53  
54  
55  
56  
57  
58  
59  
60



- 1  
2  
3 71. He, C.Y., et al., *Age at menarche and risk of type 2 diabetes: Results from 2 large prospective cohort studies*.  
4 American Journal of Epidemiology, 2010. **171**(3): p. 334-344.  
5  
6 72. Jacobsen, B.K., I. Heuch, and G. Kvale, *Association of low age at menarche with increased all-cause*  
7 *mortality: A 37-year follow-up of 61,319 Norwegian women*. American Journal of Epidemiology, 2007.  
8 **166**(12): p. 1431-1437.  
9  
10 73. Jacobsen, B.K., et al., *Age at menarche, total mortality and mortality from ischaemic heart disease and*  
11 *stroke: The Adventist Health Study, 1976-88*. International Journal of Epidemiology, 2009. **38**(1): p. 245-  
12 252.  
13  
14 74. Remsberg, K.E., et al., *Early menarche and the development of cardiovascular disease risk factors in*  
15 *adolescent girls: The Fels Longitudinal Study*. Journal of Clinical Endocrinology & Metabolism, 2005. **90**(5):  
16 p. 2718-2724.  
17  
18 75. Widen, E., et al., *Pubertal timing and growth influences cardiometabolic risk factors in adult males and*  
19 *females*. Diabetes Care, 2012. **35**(4): p. 850-856.  
20  
21 76. Pirus, C. and H. Leridon, *Large child cohort studies across the world*. Population, 2010. **65**(4): p. 575-629.  
22  
23 [dataset] 77. *The Inter-University Consortium for Political and Social Research (ICPSR). NICHD Study of Early*  
24 *Child Care and Youth Development (SECCYD) Series*. <https://www.icpsr.umich.edu/web/ICPSR/series/233>.  
25 [cited 2022].  
26  
27  
28  
29  
30  
31  
32  
33  
34  
35  
36  
37  
38  
39  
40  
41  
42  
43  
44  
45  
46  
47  
48  
49  
50  
51  
52  
53  
54  
55  
56  
57  
58  
59  
60

1  
2  
3  
4  
5  
6  
7  
8  
9  
10  
11  
12  
13  
14  
15  
16  
17  
18  
19  
20  
21  
22  
23  
24  
25  
26  
27  
28  
29  
30  
31  
32  
33  
34  
35  
36  
37  
38  
39  
40  
41  
42  
43  
44  
45  
46  
47  
48  
49  
50  
51  
52  
53  
54  
55  
56  
57  
58  
59  
60

**Figure caption:**

Figure 1. Description of the data collections in the SECCYD (repeated assessments between birth and age 15.5) and SHINE (single assessment in young adulthood), as well as single follow-up assessments at ages 17-18, 22, and 26-27 years.

For peer review only

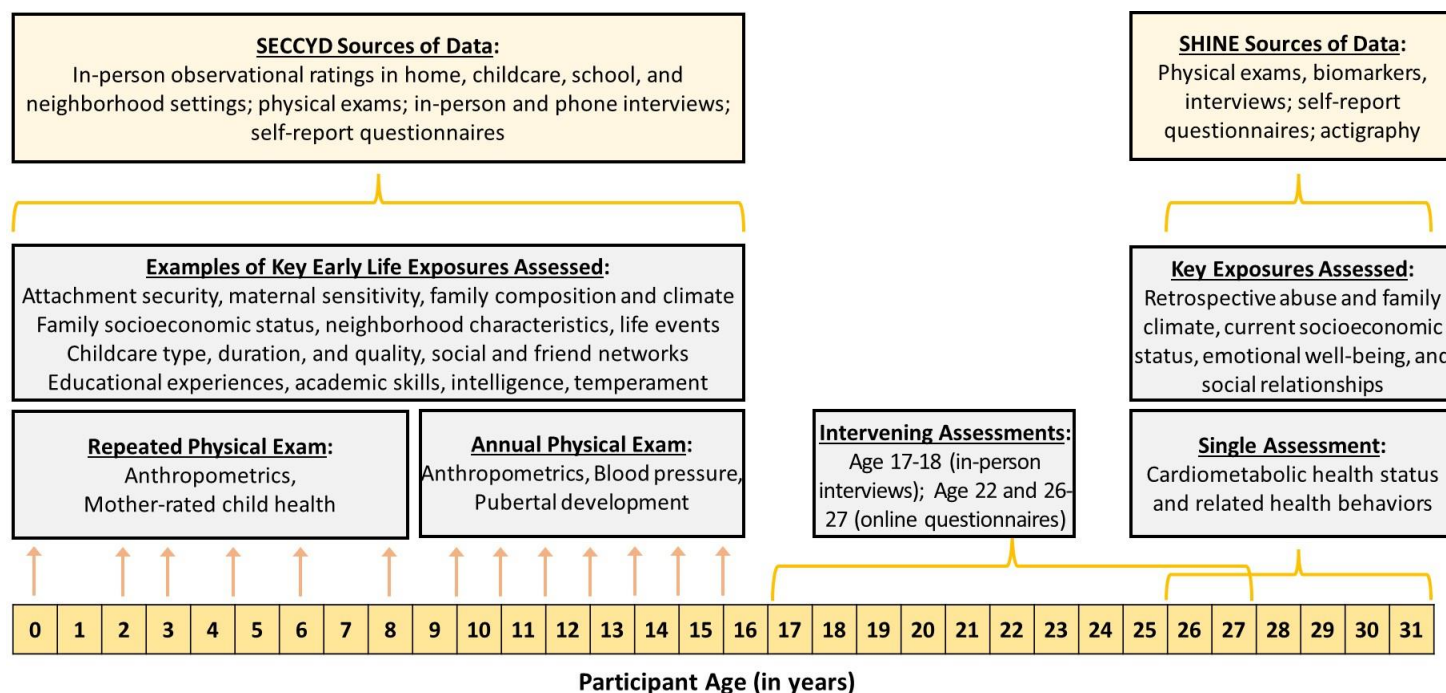

Figure 1. Description of the data collections in the SECCYD (repeated assessments between birth and age 15.5) and SHINE (single assessment in young adulthood), as well as single follow-up assessments at ages 17-18, 22, and 26-27 years.

STROBE Statement—Checklist of items that should be included in reports of *cohort studies*

|                           | Item No | Recommendation                                                                                                                                                                       |                                        |
|---------------------------|---------|--------------------------------------------------------------------------------------------------------------------------------------------------------------------------------------|----------------------------------------|
| <b>Title and abstract</b> | 1       | (a) Indicate the study's design with a commonly used term in the title or the abstract                                                                                               | Page 1                                 |
|                           |         | (b) Provide in the abstract an informative and balanced summary of what was done and what was found                                                                                  | Page 3                                 |
| <b>Introduction</b>       |         |                                                                                                                                                                                      |                                        |
| Background/rationale      | 2       | Explain the scientific background and rationale for the investigation being reported                                                                                                 | Pages 5-6                              |
| Objectives                | 3       | State specific objectives, including any prespecified hypotheses                                                                                                                     | Page 6                                 |
| <b>Methods</b>            |         |                                                                                                                                                                                      |                                        |
| Study design              | 4       | Present key elements of study design early in the paper                                                                                                                              | Pages 6-7                              |
| Setting                   | 5       | Describe the setting, locations, and relevant dates, including periods of recruitment, exposure, follow-up, and data collection                                                      | Pages 6-7                              |
| Participants              | 6       | (a) Give the eligibility criteria, and the sources and methods of selection of participants. Describe methods of follow-up                                                           | Pages 6-7, Pages 8-9                   |
|                           |         | (b) For matched studies, give matching criteria and number of exposed and unexposed                                                                                                  | n/a                                    |
| Variables                 | 7       | Clearly define all outcomes, exposures, predictors, potential confounders, and effect modifiers. Give diagnostic criteria, if applicable                                             | Pages 12-14                            |
| Data sources/ measurement | 8*      | For each variable of interest, give sources of data and details of methods of assessment (measurement). Describe comparability of assessment methods if there is more than one group | Pages 12-14                            |
| Bias                      | 9       | Describe any efforts to address potential sources of bias                                                                                                                            | Pages 9-10                             |
| Study size                | 10      | Explain how the study size was arrived at                                                                                                                                            | Page 6                                 |
| Quantitative variables    | 11      | Explain how quantitative variables were handled in the analyses. If applicable, describe which groupings were chosen and why                                                         | Pages 16-21                            |
| Statistical methods       | 12      | (a) Describe all statistical methods, including those used to control for confounding                                                                                                | n/a, current paper is a Cohort Profile |
|                           |         | (b) Describe any methods used to examine subgroups and interactions                                                                                                                  | n/a                                    |
|                           |         | (c) Explain how missing data were addressed                                                                                                                                          | This is noted in Tables.               |
|                           |         | (d) If applicable, explain how loss to follow-up was addressed                                                                                                                       | Attrition, page 8                      |
|                           |         | (e) Describe any sensitivity analyses                                                                                                                                                | n/a, current paper is a Cohort Profile |
| <b>Results</b>            |         |                                                                                                                                                                                      |                                        |
| Participants              | 13*     | (a) Report numbers of individuals at each stage of study—eg numbers potentially eligible, examined for eligibility,                                                                  | n/a, current paper is a                |

|                          |     |                                                                                                                                                                                                              |                                                                 |
|--------------------------|-----|--------------------------------------------------------------------------------------------------------------------------------------------------------------------------------------------------------------|-----------------------------------------------------------------|
|                          |     | confirmed eligible, included in the study, completing follow-up, and analysed                                                                                                                                | Cohort Profile,<br>Participation rates, pg 8                    |
|                          |     | (b) Give reasons for non-participation at each stage                                                                                                                                                         | n/a                                                             |
|                          |     | (c) Consider use of a flow diagram                                                                                                                                                                           | n/a                                                             |
| Descriptive data         | 14* | (a) Give characteristics of study participants (eg demographic, clinical, social) and information on exposures and potential confounders                                                                     | Page 8                                                          |
|                          |     | (b) Indicate number of participants with missing data for each variable of interest                                                                                                                          | This is noted in Tables.                                        |
|                          |     | (c) Summarise follow-up time (eg, average and total amount)                                                                                                                                                  | Figure 1                                                        |
| Outcome data             | 15* | Report numbers of outcome events or summary measures over time                                                                                                                                               | Pages 16-21                                                     |
| Main results             | 16  | (a) Give unadjusted estimates and, if applicable, confounder-adjusted estimates and their precision (eg, 95% confidence interval). Make clear which confounders were adjusted for and why they were included | Descriptive results only because is a Cohort Profile, pgs 16-21 |
|                          |     | (b) Report category boundaries when continuous variables were categorized                                                                                                                                    | Page 18 and Tables                                              |
|                          |     | (c) If relevant, consider translating estimates of relative risk into absolute risk for a meaningful time period                                                                                             | n/a                                                             |
| Other analyses           | 17  | Report other analyses done—eg analyses of subgroups and interactions, and sensitivity analyses                                                                                                               | n/a                                                             |
| <b>Discussion</b>        |     |                                                                                                                                                                                                              |                                                                 |
| Key results              | 18  | Summarise key results with reference to study objectives                                                                                                                                                     | Pages 21-24                                                     |
| Limitations              | 19  | Discuss limitations of the study, taking into account sources of potential bias or imprecision. Discuss both direction and magnitude of any potential bias                                                   | Pages 21-22                                                     |
| Interpretation           | 20  | Give a cautious overall interpretation of results considering objectives, limitations, multiplicity of analyses, results from similar studies, and other relevant evidence                                   | Page 24                                                         |
| Generalisability         | 21  | Discuss the generalisability (external validity) of the study results                                                                                                                                        | Pages 21-24                                                     |
| <b>Other information</b> |     |                                                                                                                                                                                                              |                                                                 |
| Funding                  | 22  | Give the source of funding and the role of the funders for the present study and, if applicable, for the original study on which the present article is based                                                | Page 25                                                         |

\*Give information separately for exposed and unexposed groups.

**Note:** An Explanation and Elaboration article discusses each checklist item and gives methodological background and published examples of transparent reporting. The STROBE checklist is best used in conjunction with this article (freely available on the Web sites of PLoS Medicine at <http://www.plosmedicine.org/>, Annals of Internal Medicine at <http://www.annals.org/>, and Epidemiology at <http://www.epidem.com/>). Information on the STROBE Initiative is available at <http://www.strobe-statement.org>.
